# Supplementary material for: The role of hypervalent iodine(iii) reagents in promoting alkoxylation of unactivated C(sp3)–H bonds catalyzed by palladium(ii) complexes
Source: PubMed Central journal article supplement (PMC8153247; doi:10.1039/d1sc01230d), 2021-04-14
Supplement: SC-012-D1SC01230D-s001.pdf [file SC-012-D1SC01230D-s001.pdf]

*“Supporting Information for”*

**The role of hypervalent iodine(III) reagents in promoting alkoxylation of unactivated C(sp<sup>3</sup>)–H bonds catalyzed by palladium(II) complexes**

Payam Abdolalian,<sup>‡</sup> Samaneh K. Tizhoush,<sup>‡</sup> Kaveh Farshadfar,<sup>‡</sup> Alireza Ariafard<sup>†\*</sup>

<sup>‡</sup>*Department of Chemistry, Islamic Azad University, Central Tehran Branch, Poonak, Tehran, 1469669191, Iran*

<sup>†</sup>*School of Natural Sciences - Chemistry, University of Tasmania, Private Bag 75, Hobart, TAS 7001, Australia*

**Content:**

**Fig. S1** Comparing the calculated mechanisms of oxidative addition from **18** via two different pathways. (page S2)

**Fig S2.** Wave function analysis carried out along the IRC of **TS**<sub>17-18</sub> and **TS**<sub>18-19</sub>. (page S3)

**Fig. S3** Comparing the calculated mechanisms of cyclopalladation via removal of  $\alpha$ -,  $\beta$ - and  $\gamma$ -C-H protons by the OAc ligand. (page S4)

**Table S1.** Total potential (E), enthalpy (H) and Gibbs free energies (G) of all structures optimized at the SMD/M06/BS1 level of theory along with the total potential energies calculated by SMD/M06/BS2//SMD/M06/BS1 and Cartesian coordinates for all of the calculated structures. (page S5)

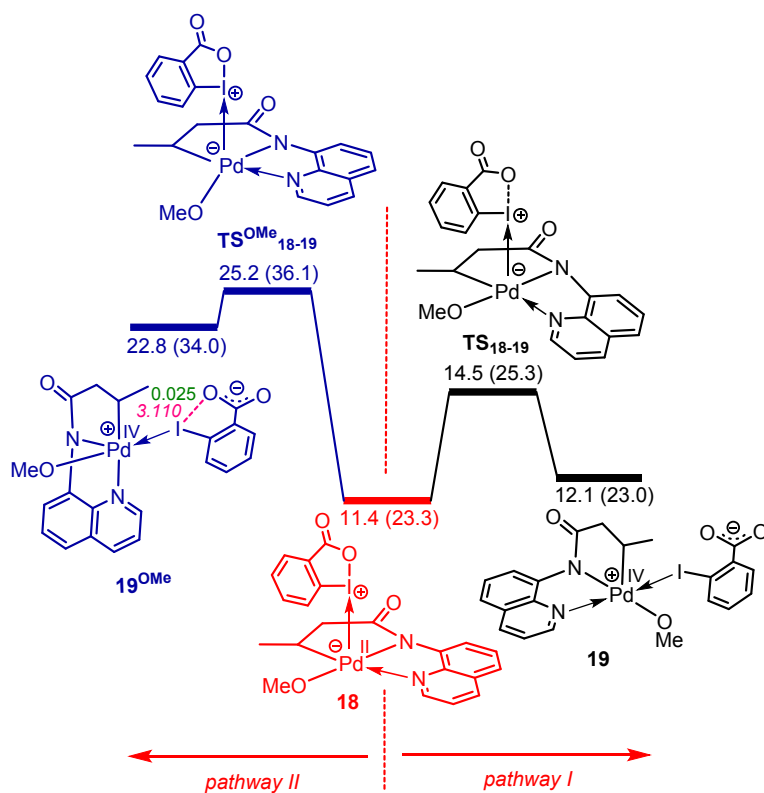

**Fig. S1** Comparing the calculated mechanisms of oxidative addition from **18** via pathways I and II. Free energies (potential energies) are given in kcal/mol. The I-O distance (Å) and the WBI value between I and O are annotated in pink and green, respectively. Pathway I involves the migration of the quinoline to the apical position while in pathway II, the isomerization occurs via the movement of the OMe ligand. Although both pathways lead to oxidation of the Pd(II) center, pathway I is computed to be much more favorable than pathway II. This result supports the importance of the isomerization through moving the ligand trans to the strong  $\sigma$ -donor alkyl ligand, as discussed in the oxidative addition section.

(a)

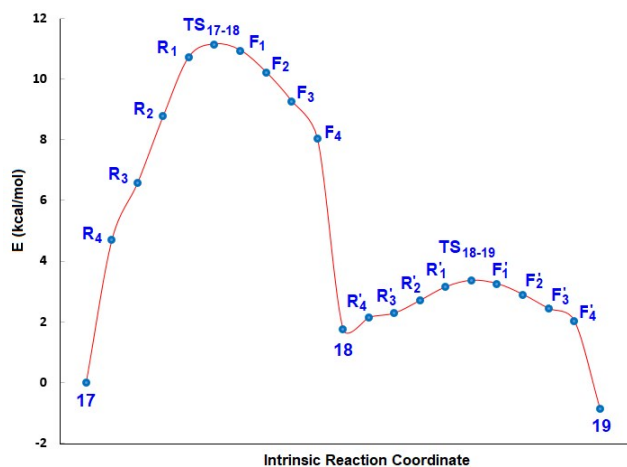

(b)

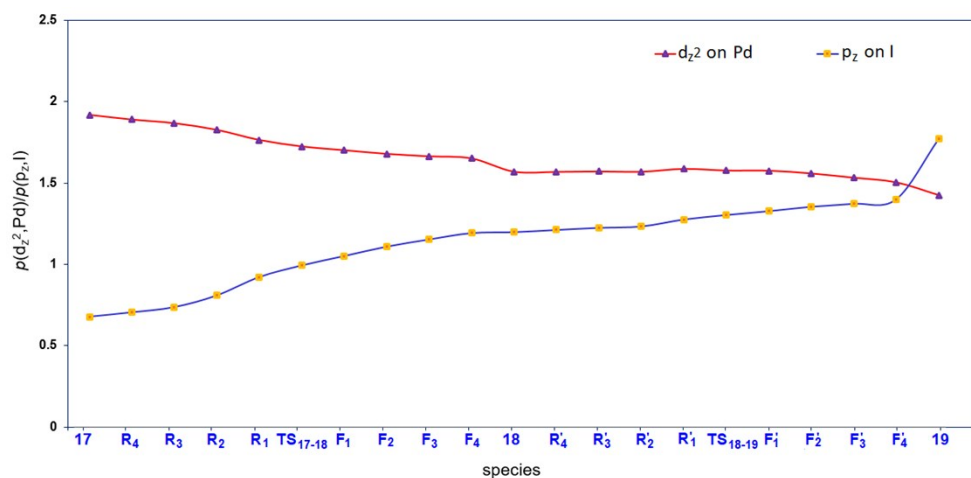

(c)

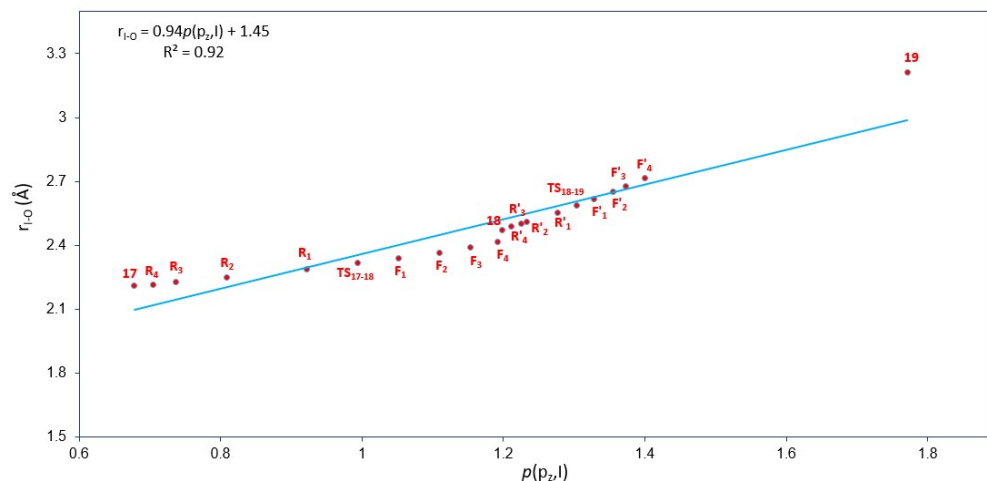

**Fig. S2** (a) IRC path for oxidation of Pd(II) to Pd(IV) by BI-OMe (transformation  $17 \rightarrow TS_{17-18} \rightarrow 18 \rightarrow TS_{18-19} \rightarrow 19$ ) calculated at the SDD/MO6/BS1 level of theory. (b) Change in population of the palladium  $d_z^2$  and iodine  $p_z$  orbitals upon moving from **17** to **19** obtained by NBO calculations. (d) Correlation between the population of iodine  $p_z$  orbital,  $p(p_z, I)$ , and the I-O<sup>a</sup> distance.

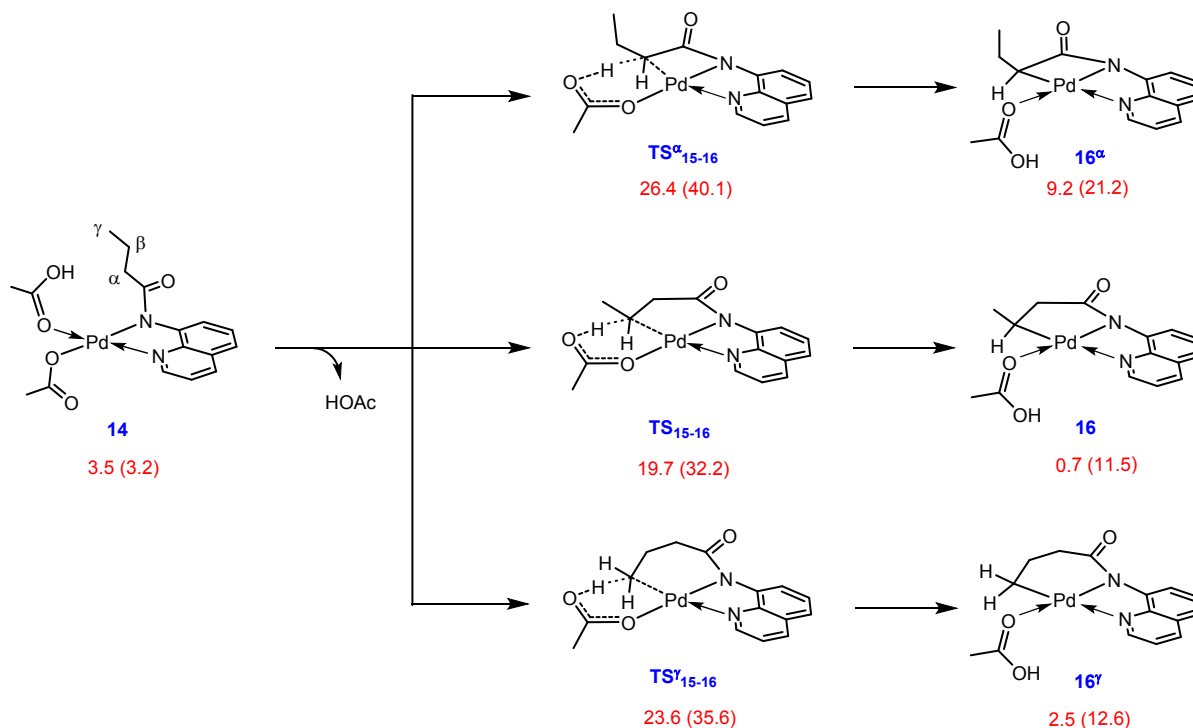

**Fig. S3** Comparing the calculated mechanisms of cyclopalladation via removal of  $\alpha$ -,  $\beta$ - and  $\gamma$ -C-H protons by the OAc ligand. Free energies (potential energies) are given in kcal/mol. It follows that  $\text{TS}_{15-16}$  is significantly lower in energy than  $\text{TS}^{\alpha}_{15-16}$  and  $\text{TS}^{\gamma}_{15-16}$ , implying that the C-H activation at the  $\beta$  position is kinetically favoured over other positions. Since  $\text{TS}_{15-16}$  lies below  $\text{TS}_{17-18}$ ,  $\text{TS}_{18-19}$  and  $\text{TS}_{21-22}$  (Figs 3a and 4), the C-H activation in this case is unlikely to be reversible and thus the regioselectivity of the alkoxylation reaction should be controlled by a kinetic preference for deprotonation of the  $\beta$ -C-H bond.

**Table S1.** Total potential (E), enthalpy (H) and Gibbs free energies (G) of all structures optimized at the SMD/M06/BS1 level of theory along with the total potential energies calculated by SMD/M06/BS2//SMD/M06/BS1 and Cartesian coordinates for all of the calculated structures.

**1**

E (M06-SMD/BS1) = -688.0848934 au

H (M06-SMD/BS1) = -687.822439 au

G (M06-SMD/BS1) = -687.879235 au

E (M06-SMD/BS2//M06-SMD/BS1) = -688.3457287 au

|   |             |             |             |
|---|-------------|-------------|-------------|
| C | 0.10878900  | 1.51496100  | -0.28906900 |
| C | -0.22434700 | 0.17848100  | -0.19636500 |
| C | -1.60661100 | -0.17953900 | -0.03689900 |
| C | -2.59018800 | 0.84088200  | 0.05016300  |
| C | -2.20599500 | 2.20016900  | -0.02329200 |
| C | -0.88295100 | 2.51490600  | -0.19348000 |
| H | 1.13442500  | 1.82780600  | -0.44880100 |
| C | -3.93475900 | 0.43124800  | 0.20647000  |
| H | -2.97006900 | 2.97338800  | 0.04964300  |
| H | -0.57306100 | 3.55619000  | -0.26441200 |
| C | -4.23679700 | -0.90487800 | 0.26198100  |
| C | -3.18421300 | -1.83715700 | 0.15911300  |
| H | -4.71294900 | 1.19134500  | 0.27823000  |
| H | -5.26028600 | -1.25310900 | 0.38013900  |
| H | -3.40446400 | -2.90582700 | 0.19652200  |
| N | -1.91996100 | -1.49990800 | 0.01755800  |
| N | 0.64616000  | -0.91117700 | -0.27376800 |
| H | 0.14346100  | -1.80049100 | -0.29910900 |
| C | 2.00447200  | -1.07760500 | -0.18804400 |
| C | 2.89417300  | 0.12123100  | -0.02131900 |
| H | 2.81654100  | 0.74169500  | -0.92900600 |
| H | 2.50720300  | 0.74270000  | 0.80218900  |
| C | 4.34789100  | -0.24274300 | 0.22957500  |
| H | 4.72043300  | -0.85272900 | -0.60577500 |
| H | 4.41616700  | -0.87727600 | 1.12543900  |
| C | 5.20745600  | 0.99698400  | 0.39779400  |
| H | 4.86590900  | 1.60687400  | 1.24648100  |
| H | 6.25830400  | 0.73614700  | 0.57755900  |
| H | 5.17073400  | 1.63157300  | -0.49939200 |
| O | 2.45284400  | -2.22279200 | -0.24450200 |

**2 (BI-OMe)**

E (M06-SMD/BS1) = -545.7135263 au

H (M06-SMD/BS1) = -545.566294 au

G (M06-SMD/BS1) = -545.617131 au

E (M06-SMD/BS2//M06-SMD/BS1) = -832.3361573 au

|   |             |             |             |
|---|-------------|-------------|-------------|
| C | -2.93306700 | 0.60943400  | 0.11731200  |
| C | -1.73941000 | -0.11061000 | 0.06520900  |
| C | -0.56254800 | 0.59754800  | -0.10691500 |
| C | -0.50256400 | 1.96962600  | -0.24512500 |
| C | -1.70894800 | 2.66807500  | -0.18972800 |
| C | -2.91472000 | 1.99300100  | -0.00627000 |
| H | -3.86643700 | 0.06542700  | 0.25283400  |
| H | 0.44669500  | 2.47874300  | -0.39778500 |
| H | -1.70053400 | 3.75159700  | -0.29393300 |
| H | -3.84692500 | 2.55281500  | 0.03515000  |
| I | 1.18775700  | -0.62872300 | -0.15655800 |
| C | -1.70146400 | -1.59996200 | 0.17117900  |
| O | -2.73049200 | -2.25551500 | 0.33617200  |
| O | -0.51921500 | -2.11991000 | 0.06964700  |
| O | 2.36312200  | 1.03535900  | -0.32982500 |
| C | 2.78933800  | 1.55094300  | 0.92062900  |
| H | 3.39550400  | 2.43940400  | 0.70094200  |
| H | 1.94299400  | 1.85393700  | 1.55770800  |
| H | 3.41054600  | 0.83260400  | 1.47695500  |

### 3

E (M06-SMD/BS1) = -802.5368415 au

H (M06-SMD/BS1) = -802.239691 au

G (M06-SMD/BS1) = -802.303405 au

E (M06-SMD/BS2//M06-SMD/BS1) = -802.8443413 au

|   |             |             |             |
|---|-------------|-------------|-------------|
| C | -1.63872400 | 2.26884500  | 0.03603400  |
| C | -1.10504500 | 1.09505600  | 0.51861700  |
| C | -1.78492300 | -0.14074100 | 0.30394600  |
| C | -2.99627800 | -0.12244700 | -0.44557300 |
| C | -3.51253100 | 1.10109100  | -0.93223000 |
| C | -2.84862100 | 2.27672000  | -0.68716200 |
| H | -1.10697200 | 3.20111000  | 0.22201400  |
| C | -3.65127300 | -1.35758800 | -0.66050000 |
| H | -4.44428400 | 1.08861600  | -1.49760000 |
| H | -3.24427900 | 3.22128300  | -1.05540100 |
| C | -3.11366300 | -2.50547900 | -0.14119500 |
| C | -1.91624300 | -2.40989400 | 0.60016500  |
| H | -4.57712700 | -1.37219200 | -1.23575100 |
| H | -3.58823500 | -3.47363000 | -0.28363600 |
| H | -1.48211700 | -3.31518200 | 1.03056000  |

|   |             |             |             |
|---|-------------|-------------|-------------|
| N | -1.26706100 | -1.28683600 | 0.82192000  |
| N | 0.08430300  | 1.13692300  | 1.29008900  |
| C | 1.29187400  | 0.56317700  | 1.02362000  |
| C | 1.45739700  | -0.09115700 | -0.32605100 |
| H | 1.11989800  | -1.13326000 | -0.22782200 |
| H | 0.78911400  | 0.38278500  | -1.05779000 |
| C | 2.87191300  | -0.08662900 | -0.88703600 |
| H | 2.79980900  | -0.48566400 | -1.91787800 |
| C | 3.48726000  | 1.30047200  | -0.95454700 |
| H | 2.79467600  | 1.99457600  | -1.44955300 |
| H | 3.70072700  | 1.68212500  | 0.05186600  |
| H | 4.42085900  | 1.30170200  | -1.53061700 |
| O | 2.19015100  | 0.61183900  | 1.86501000  |
| O | 3.64683300  | -0.99766100 | -0.12129500 |
| C | 4.89851200  | -1.29068200 | -0.69175400 |
| H | 5.60842200  | -0.45239000 | -0.60849900 |
| H | 5.31334200  | -2.14779200 | -0.14912300 |
| H | 4.80229700  | -1.56055100 | -1.75799100 |
| H | 0.03937400  | 1.59997600  | 2.19543500  |

### **Pd<sub>3</sub>(OAc)<sub>6</sub>**

E (M06-SMD/BS1) = -1754.105696 au

H (M06-SMD/BS1) = -1753.756817 au

G (M06-SMD/BS1) = -1753.864489 au

E (M06-SMD/BS2//M06-SMD/BS1) = -1754.737721 au

|    |             |             |             |
|----|-------------|-------------|-------------|
| Pd | -1.79376100 | 0.05833100  | -0.00038000 |
| O  | -1.93306900 | 1.20231200  | -1.68086200 |
| O  | -2.05882800 | 1.66595200  | 1.25226600  |
| C  | -1.17749700 | 2.31228700  | 1.88706000  |
| O  | 0.07208900  | 2.27780800  | 1.67841800  |
| Pd | 0.94613200  | 1.52227700  | -0.00058100 |
| C  | -1.26857400 | 2.26109700  | -1.88971600 |
| O  | -0.24075300 | 2.63496600  | -1.25624700 |
| O  | -2.00982800 | -1.07482600 | 1.67950600  |
| O  | -2.16675200 | -1.52717500 | -1.25155100 |
| C  | -1.32996900 | -2.23455800 | -1.88138400 |
| O  | -0.08070100 | -2.28080400 | -1.67342400 |
| Pd | 0.84791700  | -1.58229500 | 0.00151400  |
| C  | -1.41006400 | -2.17055000 | 1.89461700  |
| O  | -0.40580700 | -2.60901900 | 1.26516900  |
| O  | 1.94875500  | -1.19978900 | 1.67516800  |

|   |             |             |             |
|---|-------------|-------------|-------------|
| O | 2.39957700  | -1.11208700 | -1.26160400 |
| C | 2.59860000  | -0.13199100 | 1.88469000  |
| C | 2.58737000  | -0.03459900 | -1.89519400 |
| O | 2.47216200  | 0.95563100  | 1.25342200  |
| O | 2.00626300  | 1.07112100  | -1.68144200 |
| C | -1.77126700 | 3.16832100  | -2.96880000 |
| H | -2.46582700 | 3.88838400  | -2.51602800 |
| H | -0.94711300 | 3.72443800  | -3.42508700 |
| H | -2.31673400 | 2.60004400  | -3.72824900 |
| C | -1.86505100 | -3.13038300 | -2.95455600 |
| H | -2.10643100 | -4.10127900 | -2.50169100 |
| H | -2.77805500 | -2.71521200 | -3.39099400 |
| H | -1.11075200 | -3.29589500 | -3.72988500 |
| C | -1.97015800 | -3.03994400 | 2.97673000  |
| H | -1.19300400 | -3.67873100 | 3.40610000  |
| H | -2.43828200 | -2.43040200 | 3.75578500  |
| H | -2.74459800 | -3.68172000 | 2.53609000  |
| C | 3.63885300  | -0.17638800 | 2.95997500  |
| H | 3.75144100  | 0.80429700  | 3.43164200  |
| H | 3.39087900  | -0.93520800 | 3.70809400  |
| H | 4.59744300  | -0.44930000 | 2.49888400  |
| C | 3.61826000  | -0.05336900 | -2.98027400 |
| H | 4.59072000  | 0.19398700  | -2.53410000 |
| H | 3.68902700  | -1.04659600 | -3.43319100 |
| H | 3.39165400  | 0.69942100  | -3.74133700 |
| C | -1.65464400 | 3.23444900  | 2.96522800  |
| H | -2.57510200 | 2.85729200  | 3.42043200  |
| H | -0.88026600 | 3.37361900  | 3.72558400  |
| H | -1.86827500 | 4.21152300  | 2.51170400  |

**Pd(OAc)<sub>2</sub>**

E (M06-SMD/BS1) = -584.6589628 au

H (M06-SMD/BS1) = -584.544567 au

G (M06-SMD/BS1) = -584.59454 au

E (M06-SMD/BS2//M06-SMD/BS1) = -584.8738101 au

|    |             |             |             |
|----|-------------|-------------|-------------|
| Pd | 0.00003200  | 0.00004500  | -0.01574500 |
| O  | -1.76187800 | -1.08333600 | -0.01316900 |
| C  | -2.43934000 | -0.00002100 | -0.00199700 |
| O  | -1.76190300 | 1.08341200  | -0.01314400 |
| O  | 1.76191200  | 1.08328100  | -0.01359600 |
| C  | 2.43933000  | -0.00013200 | -0.00221700 |



|   |             |             |             |
|---|-------------|-------------|-------------|
| O | 1.76174200  | -1.08338900 | -0.01358200 |
| C | -3.91522900 | -0.00003400 | 0.05424200  |
| H | -4.22654500 | -0.00374200 | 1.10739000  |
| H | -4.31555800 | 0.90161300  | -0.42004900 |
| H | -4.31560600 | -0.89852800 | -0.42602300 |
| C | 3.91518800  | -0.00008600 | 0.05463900  |
| H | 4.31572300  | -0.90214400 | -0.41870200 |
| H | 4.31568100  | 0.89799600  | -0.42631200 |
| H | 4.22613000  | 0.00463800  | 1.10788900  |

### 13

E (M06-SMD/BS1) = -1272.796451 au

H (M06-SMD/BS1) = -1272.417225 au

G (M06-SMD/BS1) = -1272.503352 au

E (M06-SMD/BS2//M06-SMD/BS1) = -1273.266857 au

|   |             |             |             |
|---|-------------|-------------|-------------|
| C | 2.86726400  | -1.07327200 | 1.63780900  |
| C | 1.82154700  | -0.46804400 | 0.98610300  |
| C | 1.99305500  | 0.78683800  | 0.37041500  |
| C | 3.25141200  | 1.43143600  | 0.42380600  |
| C | 4.31387400  | 0.79031100  | 1.10249000  |
| C | 4.12368400  | -0.43435700 | 1.69554200  |
| H | 2.71896800  | -2.04512300 | 2.10795300  |
| C | 3.36893200  | 2.68921100  | -0.21026300 |
| H | 5.28124300  | 1.28854600  | 1.14436500  |
| H | 4.94294900  | -0.92405200 | 2.21669800  |
| C | 2.28405000  | 3.23613300  | -0.84923700 |
| C | 1.06633600  | 2.53472000  | -0.86172300 |
| H | 4.32547400  | 3.20917500  | -0.18312400 |
| H | 2.34197600  | 4.20007900  | -1.34673400 |
| H | 0.18545400  | 2.93554800  | -1.36113400 |
| N | 0.92765200  | 1.35749200  | -0.27582200 |
| N | 0.50858200  | -1.08171600 | 0.90218000  |
| H | 0.04423700  | -1.17053800 | 1.81728600  |
| C | 0.38144500  | -2.33426100 | 0.19260000  |
| C | 1.21110800  | -2.49284700 | -1.04342600 |
| H | 2.12354900  | -3.04450500 | -0.76040100 |
| H | 1.54468500  | -1.51205000 | -1.41068200 |
| C | 0.45396300  | -3.24816600 | -2.12913100 |
| H | 0.15945300  | -4.23523200 | -1.74722400 |
| H | -0.48012100 | -2.70704300 | -2.35131400 |
| C | 1.28970900  | -3.39444700 | -3.38655400 |

|    |             |             |             |
|----|-------------|-------------|-------------|
| H  | 1.56869800  | -2.41295100 | -3.79544800 |
| H  | 0.74364500  | -3.93816400 | -4.16766600 |
| H  | 2.21909100  | -3.94486700 | -3.18241000 |
| O  | -0.41348800 | -3.15062100 | 0.60241100  |
| Pd | -0.77680000 | 0.25520600  | -0.13174400 |
| O  | -1.90028900 | 1.60206900  | -1.16410800 |
| C  | -2.50164700 | 2.46437300  | -0.40002500 |
| O  | -2.40659200 | 2.49016600  | 0.83132700  |
| O  | -2.44288800 | -0.90362000 | 0.04783700  |
| C  | -2.75347700 | -1.23723000 | 1.26332200  |
| O  | -2.13672200 | -0.86918300 | 2.27097200  |
| C  | -3.31840500 | 3.47556700  | -1.15835400 |
| H  | -2.64395900 | 4.13792400  | -1.71703300 |
| H  | -3.92236100 | 4.07708800  | -0.47261000 |
| H  | -3.96734600 | 2.97908600  | -1.88893100 |
| C  | -3.93042800 | -2.16892000 | 1.35737400  |
| H  | -4.33400100 | -2.17924300 | 2.37450300  |
| H  | -3.59281300 | -3.18341200 | 1.10386200  |
| H  | -4.71433200 | -1.89292800 | 0.64373900  |

### TS<sub>13-14</sub>

E (M06-SMD/BS1) = -1272.784221 au  
H (M06-SMD/BS1) = -1272.410737 au  
G (M06-SMD/BS1) = -1272.49522 au  
E (M06-SMD/BS2//M06-SMD/BS1) = -1273.255069 au

|   |             |             |             |
|---|-------------|-------------|-------------|
| C | 2.50651100  | 0.24680700  | 1.98384200  |
| C | 1.49527600  | 0.28057800  | 1.05266500  |
| C | 1.13974500  | 1.51292700  | 0.46101000  |
| C | 1.84895300  | 2.69627800  | 0.77206900  |
| C | 2.89411800  | 2.62551500  | 1.72281200  |
| C | 3.20271400  | 1.42772800  | 2.32115300  |
| H | 2.77631100  | -0.70251200 | 2.44557400  |
| C | 1.45305500  | 3.88544100  | 0.11819600  |
| H | 3.43596000  | 3.53601800  | 1.97447600  |
| H | 3.99928800  | 1.37706400  | 3.06055000  |
| C | 0.41096700  | 3.86209300  | -0.77574900 |
| C | -0.26844300 | 2.65443700  | -1.01164400 |
| H | 1.98289800  | 4.81183800  | 0.33662500  |
| H | 0.08563900  | 4.75939800  | -1.29476700 |
| H | -1.11971900 | 2.60372600  | -1.68880500 |
| N | 0.08363900  | 1.52819900  | -0.41577700 |

|    |             |             |             |
|----|-------------|-------------|-------------|
| N  | 0.78266700  | -0.88578800 | 0.62090400  |
| H  | 0.04891500  | -1.54482200 | 1.41455500  |
| C  | 1.43384300  | -1.79424600 | -0.25364800 |
| C  | 2.73941400  | -1.37915000 | -0.87193900 |
| H  | 3.48704000  | -1.26192700 | -0.07139100 |
| H  | 2.61461300  | -0.36949100 | -1.29925800 |
| C  | 3.24207200  | -2.35290300 | -1.92327000 |
| H  | 3.35873800  | -3.34826300 | -1.47106400 |
| H  | 2.48403100  | -2.46097200 | -2.71315900 |
| C  | 4.55908100  | -1.89054400 | -2.51997800 |
| H  | 4.45544200  | -0.90639600 | -2.99901900 |
| H  | 4.92456100  | -2.59334400 | -3.27949400 |
| H  | 5.33599000  | -1.80092100 | -1.74718400 |
| O  | 0.90537000  | -2.86997100 | -0.48742000 |
| Pd | -0.95164300 | -0.21283300 | -0.32919100 |
| O  | -2.59378200 | 0.52404000  | -1.29158700 |
| C  | -3.41743300 | 1.17452800  | -0.52784100 |
| O  | -3.26144000 | 1.34140300  | 0.68710000  |
| O  | -2.02594300 | -1.92858800 | 0.11507300  |
| C  | -1.77102800 | -2.53987000 | 1.19651400  |
| O  | -0.78442800 | -2.28122600 | 1.95839900  |
| C  | -4.59478700 | 1.75631200  | -1.26344600 |
| H  | -4.24847900 | 2.58465600  | -1.89597300 |
| H  | -5.34267100 | 2.13478100  | -0.56027200 |
| H  | -5.04828800 | 1.00866500  | -1.92419000 |
| C  | -2.67326100 | -3.65967200 | 1.59634000  |
| H  | -2.15389000 | -4.60853300 | 1.40839600  |
| H  | -3.60563000 | -3.64325700 | 1.02605900  |
| H  | -2.88231400 | -3.60508200 | 2.67022900  |

#### 14

E (M06-SMD/BS1) = -1272.790432 au

H (M06-SMD/BS1) = -1272.412662 au

G (M06-SMD/BS1) = -1272.496878 au

E (M06-SMD/BS2//M06-SMD/BS1) = -1273.262157 au

|   |             |            |             |
|---|-------------|------------|-------------|
| C | -2.49010400 | 1.25001500 | -1.51615500 |
| C | -1.43152200 | 0.91162500 | -0.69617800 |
| C | -0.59698500 | 1.95533400 | -0.22447100 |
| C | -0.88569900 | 3.31448700 | -0.48785300 |
| C | -2.00723000 | 3.62162000 | -1.29241700 |
| C | -2.77402800 | 2.60263700 | -1.80324000 |

|    |             |             |             |
|----|-------------|-------------|-------------|
| H  | -3.11490200 | 0.47106800  | -1.94742000 |
| C  | -0.01397500 | 4.28375700  | 0.05854400  |
| H  | -2.23135200 | 4.66462100  | -1.51031900 |
| H  | -3.62265400 | 2.83135300  | -2.44531200 |
| C  | 1.07209300  | 3.89131500  | 0.80179400  |
| C  | 1.32137500  | 2.52122000  | 0.98674200  |
| H  | -0.21529200 | 5.33885000  | -0.12361900 |
| H  | 1.75763200  | 4.61465600  | 1.23461500  |
| H  | 2.19173700  | 2.16849900  | 1.53731200  |
| N  | 0.51706200  | 1.59637100  | 0.48966800  |
| N  | -1.05886500 | -0.39070100 | -0.29704400 |
| H  | -0.26447400 | -1.63963900 | -1.54606300 |
| C  | -1.92406100 | -1.27431100 | 0.30474000  |
| C  | -3.39855400 | -0.94954000 | 0.40918200  |
| H  | -3.86012000 | -1.10776800 | -0.57852700 |
| H  | -3.53421100 | 0.11932500  | 0.63176000  |
| C  | -4.12286300 | -1.79749500 | 1.44353100  |
| H  | -4.01613100 | -2.86061800 | 1.18682400  |
| H  | -3.64234500 | -1.66865900 | 2.42511500  |
| C  | -5.59259300 | -1.42597400 | 1.52839600  |
| H  | -5.72263000 | -0.37202200 | 1.81336700  |
| H  | -6.12030700 | -2.03851600 | 2.27085600  |
| H  | -6.09498200 | -1.56937600 | 0.56078900  |
| O  | -1.49560600 | -2.34263100 | 0.75550900  |
| Pd | 0.89273700  | -0.38149300 | 0.35438000  |
| O  | 2.79348700  | -0.20672900 | 1.10791500  |
| C  | 3.70369400  | 0.07491600  | 0.22955600  |
| O  | 3.48871900  | 0.22079500  | -0.98037300 |
| O  | 1.39759600  | -2.38770700 | -0.05493900 |
| C  | 0.97564300  | -2.99835700 | -1.04921600 |
| O  | 0.08700500  | -2.51061800 | -1.87797600 |
| C  | 5.08074500  | 0.24906800  | 0.81327200  |
| H  | 5.10197200  | 1.16637400  | 1.41683300  |
| H  | 5.83266900  | 0.32590100  | 0.02215500  |
| H  | 5.32649300  | -0.58509200 | 1.48065300  |
| C  | 1.44400800  | -4.36447700 | -1.38344900 |
| H  | 0.62350200  | -5.07053800 | -1.20153300 |
| H  | 2.30375000  | -4.63716100 | -0.76766500 |
| H  | 1.69908400  | -4.42220500 | -2.44738800 |

E (M06-SMD/BS1) = -1043.797608 au  
 H (M06-SMD/BS1) = -1043.488065 au  
 G (M06-SMD/BS1) = -1043.559153 au  
 E (M06-SMD/BS2//M06-SMD/BS1) = -1044.179531 au

|    |             |             |             |
|----|-------------|-------------|-------------|
| C  | -3.07704800 | 1.66597900  | 0.22314200  |
| C  | -1.90648900 | 0.93814400  | 0.06276100  |
| C  | -2.01879500 | -0.47723800 | 0.00100700  |
| C  | -3.26673600 | -1.13709400 | 0.09773700  |
| C  | -4.43361100 | -0.35733700 | 0.26106900  |
| C  | -4.32191100 | 1.01017800  | 0.32031700  |
| H  | -3.03403700 | 2.74669000  | 0.27499100  |
| C  | -3.26982900 | -2.54853200 | 0.02734100  |
| H  | -5.39824900 | -0.85618000 | 0.33859100  |
| H  | -5.21461000 | 1.62052500  | 0.44735200  |
| C  | -2.09208000 | -3.23735500 | -0.12916900 |
| C  | -0.88730500 | -2.52245300 | -0.21711800 |
| H  | -4.21981700 | -3.07686100 | 0.10023500  |
| H  | -2.06776500 | -4.32210100 | -0.18534700 |
| H  | 0.07203600  | -3.02117800 | -0.34125800 |
| N  | -0.86351900 | -1.20192100 | -0.15383200 |
| N  | -0.59389700 | 1.41886600  | -0.04138800 |
| C  | -0.24969500 | 2.73669500  | -0.05450800 |
| C  | 1.22528100  | 3.04772700  | -0.19343300 |
| H  | 1.42926400  | 3.91216500  | 0.45418400  |
| H  | 1.38073500  | 3.40319100  | -1.22484500 |
| C  | 2.21260000  | 1.93966800  | 0.12272500  |
| H  | 2.03360500  | 1.53218700  | 1.12885900  |
| H  | 2.16744800  | 1.13692700  | -0.68639400 |
| C  | 3.66639000  | 2.37916900  | 0.02875700  |
| H  | 3.90039500  | 2.76494700  | -0.97191900 |
| H  | 4.34477100  | 1.54547000  | 0.24706800  |
| H  | 3.85837000  | 3.17736800  | 0.75827600  |
| O  | -1.05992900 | 3.66816700  | 0.01093800  |
| Pd | 0.77184700  | -0.03761200 | -0.23698800 |
| O  | 2.04011600  | -1.62256100 | -0.55304700 |
| C  | 2.96516200  | -1.80407400 | 0.33718000  |
| O  | 3.11352200  | -1.10275100 | 1.34494600  |
| C  | 3.86362800  | -2.97694800 | 0.04735900  |
| H  | 3.27437400  | -3.90269900 | 0.05690600  |
| H  | 4.66243000  | -3.04947400 | 0.79145200  |
| H  | 4.30097600  | -2.88144500 | -0.95387100 |

**TS<sub>15-16</sub>**

E (M06-SMD/BS1) = -1043.767238 au

H (M06-SMD/BS1) = -1043.463434 au

G (M06-SMD/BS1) = -1043.531714 au

E (M06-SMD/BS2//M06-SMD/BS1) = -1044.149361 au

|    |             |             |             |
|----|-------------|-------------|-------------|
| C  | -3.00387500 | 1.80766400  | 0.17628700  |
| C  | -1.89143700 | 0.98615800  | 0.06675700  |
| C  | -2.10885300 | -0.42061300 | -0.01143600 |
| C  | -3.41290900 | -0.97063800 | 0.02858800  |
| C  | -4.51904900 | -0.09815200 | 0.14391700  |
| C  | -4.30114500 | 1.25630600  | 0.21389700  |
| H  | -2.87170700 | 2.88186600  | 0.23458100  |
| C  | -3.53193100 | -2.37699000 | -0.05296900 |
| H  | -5.52400100 | -0.51656600 | 0.17316000  |
| H  | -5.14725700 | 1.93644200  | 0.30012000  |
| C  | -2.40997700 | -3.15975500 | -0.16659300 |
| C  | -1.14819200 | -2.54223000 | -0.20053400 |
| H  | -4.52545700 | -2.82360700 | -0.02463800 |
| H  | -2.47419900 | -4.24260800 | -0.23137300 |
| H  | -0.23432600 | -3.12775800 | -0.28930900 |
| N  | -1.00760500 | -1.23044500 | -0.12668600 |
| N  | -0.55053100 | 1.37225900  | 0.01491100  |
| C  | -0.06899700 | 2.62428700  | 0.23223200  |
| C  | 1.43898900  | 2.70302200  | 0.19093900  |
| C  | 2.12089100  | 1.56916100  | -0.56203100 |
| H  | 1.71642600  | 1.50404200  | -1.58548200 |
| O  | -0.76061100 | 3.62192900  | 0.47199400  |
| Pd | 0.74451800  | -0.13176000 | -0.21048400 |
| O  | 2.05511300  | -1.77394100 | -0.29166800 |
| C  | 3.09578300  | -1.55027800 | 0.39475500  |
| O  | 3.35482900  | -0.40338000 | 0.88056700  |
| C  | 4.05509900  | -2.66235200 | 0.65528700  |
| H  | 5.06185200  | -2.35774400 | 0.34694000  |
| H  | 4.08946700  | -2.85925900 | 1.73399900  |
| H  | 3.76172000  | -3.57385900 | 0.12822500  |
| H  | 2.53094000  | 0.43054000  | 0.28506200  |
| C  | 3.61648500  | 1.84457800  | -0.73191900 |
| H  | 4.12690800  | 1.98665400  | 0.23022500  |
| H  | 4.12530400  | 1.03620700  | -1.27200800 |
| H  | 3.73926300  | 2.76972100  | -1.31579600 |

|   |            |            |             |
|---|------------|------------|-------------|
| H | 1.78910100 | 2.72576000 | 1.23723000  |
| H | 1.71518600 | 3.68055700 | -0.23648000 |

## 16

E (M06-SMD/BS1) = -1043.800633 au

H (M06-SMD/BS1) = -1043.491717 au

G (M06-SMD/BS1) = -1043.562273 au

E (M06-SMD/BS2//M06-SMD/BS1) = -1044.18242 au

|    |             |             |             |
|----|-------------|-------------|-------------|
| C  | -3.22079500 | 1.40189200  | 0.17861800  |
| C  | -1.98198500 | 0.78656400  | 0.05055900  |
| C  | -1.95503100 | -0.64699600 | -0.02312700 |
| C  | -3.15662300 | -1.39903900 | 0.04379400  |
| C  | -4.39344300 | -0.72786900 | 0.17640600  |
| C  | -4.40695500 | 0.64357500  | 0.24031600  |
| H  | -3.27066400 | 2.48329000  | 0.23469700  |
| C  | -3.05418900 | -2.80800300 | -0.02719700 |
| H  | -5.31180000 | -1.31172900 | 0.22384600  |
| H  | -5.35368400 | 1.17282000  | 0.34124500  |
| C  | -1.82617400 | -3.40572000 | -0.15621800 |
| C  | -0.68351100 | -2.58796900 | -0.21811700 |
| H  | -3.96573000 | -3.40358300 | 0.02262400  |
| H  | -1.71977200 | -4.48613600 | -0.21235800 |
| H  | 0.31122900  | -3.02409900 | -0.32400000 |
| N  | -0.74301100 | -1.27123800 | -0.15610100 |
| N  | -0.74005600 | 1.41885000  | 0.00315500  |
| C  | -0.50693600 | 2.75412800  | 0.13740300  |
| C  | 0.97247500  | 3.05430500  | 0.21450100  |
| H  | 1.16054200  | 4.07195500  | -0.16505300 |
| H  | 1.21381500  | 3.08551900  | 1.29237100  |
| C  | 1.84656600  | 2.00501000  | -0.46506200 |
| H  | 1.84160100  | 2.16558100  | -1.55724300 |
| C  | 3.26295700  | 1.99156100  | 0.06064200  |
| H  | 3.29664100  | 1.73175800  | 1.13015900  |
| H  | 3.90250300  | 1.28240300  | -0.48156300 |
| H  | 3.72682500  | 2.98949900  | -0.03926100 |
| O  | -1.36976300 | 3.63563000  | 0.24206300  |
| Pd | 0.84154800  | 0.23337300  | -0.30104600 |
| O  | 2.70525100  | -1.44229800 | 1.53367800  |
| C  | 3.08751100  | -1.61672100 | 0.28342000  |
| O  | 2.54139800  | -1.04468500 | -0.66460900 |
| C  | 4.23207100  | -2.54474000 | 0.12259400  |

|   |            |             |             |
|---|------------|-------------|-------------|
| H | 4.01867400 | -3.49179600 | 0.63147200  |
| H | 4.43535900 | -2.71962700 | -0.93606600 |
| H | 5.11698100 | -2.10717000 | 0.60186000  |
| H | 1.95701400 | -0.79614800 | 1.55574300  |

**17**

E (M06-SMD/BS1) = -1360.549985 au  
H (M06-SMD/BS1) = -1360.160991 au  
G (M06-SMD/BS1) = -1360.250657 au  
E (M06-SMD/BS2//M06-SMD/BS1) = -1647.452167 au

|    |             |             |             |
|----|-------------|-------------|-------------|
| C  | 5.29265000  | 0.32695600  | 0.61249300  |
| C  | 3.94359600  | 0.22216500  | 0.29508700  |
| C  | 3.44997500  | -1.06620100 | -0.10402800 |
| C  | 4.32071100  | -2.18735900 | -0.15255300 |
| C  | 5.68525500  | -2.03073300 | 0.17992200  |
| C  | 6.14560800  | -0.79197100 | 0.55130100  |
| H  | 5.68892700  | 1.28887200  | 0.91624600  |
| C  | 3.77104200  | -3.43263900 | -0.53582300 |
| H  | 6.34479200  | -2.89652100 | 0.13498600  |
| H  | 7.19523300  | -0.65704300 | 0.80958800  |
| C  | 2.43818500  | -3.53108900 | -0.84227500 |
| C  | 1.64623100  | -2.37104200 | -0.77451400 |
| H  | 4.42405000  | -4.30438500 | -0.57791900 |
| H  | 1.98624700  | -4.47558600 | -1.13471800 |
| H  | 0.58162600  | -2.41674800 | -1.01090400 |
| N  | 2.12339900  | -1.18964400 | -0.42845300 |
| N  | 2.99954900  | 1.24544000  | 0.34854700  |
| C  | 3.23141800  | 2.53356500  | 0.72822800  |
| C  | 1.94938400  | 3.32579600  | 0.82881100  |
| H  | 2.16306800  | 4.39078900  | 0.64373100  |
| H  | 1.64967400  | 3.26051800  | 1.89040700  |
| C  | 0.81470800  | 2.79548400  | -0.04347000 |
| H  | 0.90559900  | 3.19510900  | -1.06846000 |
| C  | -0.54721800 | 3.11067400  | 0.53259200  |
| H  | -0.68883300 | 2.63045600  | 1.51369600  |
| H  | -1.36707800 | 2.78855600  | -0.12326400 |
| H  | -0.66409300 | 4.19824800  | 0.69028900  |
| O  | 4.33148900  | 3.01934300  | 1.02272100  |
| Pd | 1.15962300  | 0.80080700  | -0.30328400 |
| C  | -6.00513800 | 0.16022300  | 0.18855200  |
| C  | -4.74262300 | -0.38423100 | 0.42135500  |



|   |             |             |             |
|---|-------------|-------------|-------------|
| C | -3.66287700 | 0.15323100  | -0.25922600 |
| C | -3.76224900 | 1.20395700  | -1.14903100 |
| C | -5.03562700 | 1.73248900  | -1.36588200 |
| C | -6.14769300 | 1.21436900  | -0.70448100 |
| H | -6.86073800 | -0.25441700 | 0.71906100  |
| H | -2.88906200 | 1.60755800  | -1.65696600 |
| H | -5.15204300 | 2.56121200  | -2.06184300 |
| H | -7.13203400 | 1.64075000  | -0.88633400 |
| I | -1.81778000 | -0.80339300 | 0.24394800  |
| C | -4.52563500 | -1.50230000 | 1.37899400  |
| O | -5.44592400 | -2.02542200 | 1.99730800  |
| O | -3.27908400 | -1.87386300 | 1.50748600  |
| O | -0.82285400 | 0.45457200  | -1.12030200 |
| C | -0.76923600 | -0.04014300 | -2.45802000 |
| H | -0.34595900 | 0.76216100  | -3.07629600 |
| H | -1.77910000 | -0.27953400 | -2.82212600 |
| H | -0.13302600 | -0.93211900 | -2.54387700 |

## 7

E (M06-SMD/BS1) = -814.7975368 au

H (M06-SMD/BS1) = -814.558288 au

G (M06-SMD/BS1) = -814.616601 au

E (M06-SMD/BS2//M06-SMD/BS1) = -815.0853943 au

|   |             |             |             |
|---|-------------|-------------|-------------|
| C | -1.46560300 | 2.37471600  | -0.06201600 |
| C | -0.82135600 | 1.14448600  | -0.02562500 |
| C | -1.63567600 | -0.03835200 | 0.01939900  |
| C | -3.05153400 | 0.06769000  | 0.03638000  |
| C | -3.66193800 | 1.34209100  | 0.00319700  |
| C | -2.87111900 | 2.46277800  | -0.04597000 |
| H | -0.87089200 | 3.27995000  | -0.10017900 |
| C | -3.80199900 | -1.13009300 | 0.08421600  |
| H | -4.74913100 | 1.40902900  | 0.01477400  |
| H | -3.32823400 | 3.45101100  | -0.07523800 |
| C | -3.16258500 | -2.34237300 | 0.11254900  |
| C | -1.75638800 | -2.36070000 | 0.09144100  |
| H | -4.89008700 | -1.06713300 | 0.09795100  |
| H | -3.71326900 | -3.27889100 | 0.14974000  |
| H | -1.21508700 | -3.30652800 | 0.11262500  |
| N | -1.02159000 | -1.26475600 | 0.04646300  |
| N | 0.55810100  | 0.94197100  | -0.01955400 |
| C | 1.52468700  | 1.90240200  | 0.06235900  |

|    |            |             |             |
|----|------------|-------------|-------------|
| C  | 2.90398200 | 1.29842300  | 0.20488500  |
| H  | 3.64730600 | 1.97380800  | -0.24726500 |
| H  | 3.11841600 | 1.29177100  | 1.28815100  |
| C  | 2.98634900 | -0.12082400 | -0.33664200 |
| H  | 3.11308200 | -0.11154200 | -1.43270800 |
| C  | 4.00814600 | -1.00307700 | 0.33085700  |
| H  | 3.86113400 | -1.03590700 | 1.42082500  |
| H  | 3.96974200 | -2.03394400 | -0.05234100 |
| H  | 5.03520000 | -0.63615100 | 0.15306300  |
| O  | 1.32803800 | 3.12272600  | 0.07931700  |
| Pd | 1.16243800 | -0.96175600 | -0.10875000 |

## 8

E (M06-SMD/BS1) = -1360.558684 au

H (M06-SMD/BS1) = -1360.169958 au

G (M06-SMD/BS1) = -1360.260445 au

E (M06-SMD/BS2//M06-SMD/BS1) = -1647.42891 au

|   |            |             |             |
|---|------------|-------------|-------------|
| C | 3.75898000 | 0.16628600  | 1.99510400  |
| C | 2.74913500 | 0.05052200  | 1.05412000  |
| C | 2.27230300 | -1.25517600 | 0.71462000  |
| C | 2.80599500 | -2.39439200 | 1.37178200  |
| C | 3.80676000 | -2.23166300 | 2.35591800  |
| C | 4.26883400 | -0.97278200 | 2.64805000  |
| H | 4.14766100 | 1.14805400  | 2.24341800  |
| C | 2.31080800 | -3.66168300 | 0.98528900  |
| H | 4.20383800 | -3.11348900 | 2.85684600  |
| H | 5.04941000 | -0.83614500 | 3.39446200  |
| C | 1.36001200 | -3.75896500 | 0.00166500  |
| C | 0.89967000 | -2.57707800 | -0.60878300 |
| H | 2.70413200 | -4.55108900 | 1.47712700  |
| H | 0.96597000 | -4.71995100 | -0.31875900 |
| H | 0.15939100 | -2.61767900 | -1.40927000 |
| N | 1.33236900 | -1.38098400 | -0.26699500 |
| N | 2.18060500 | 1.14804400  | 0.39950500  |
| C | 2.03671800 | 2.42261700  | 0.88218700  |
| C | 1.23334500 | 3.31079600  | -0.03437000 |
| H | 1.66616500 | 4.32278900  | -0.02339200 |
| H | 0.22079800 | 3.39569800  | 0.39141400  |
| C | 1.18656600 | 2.77352800  | -1.44158600 |
| H | 2.16171700 | 2.82865500  | -1.93982300 |
| C | 0.05407200 | 3.19715600  | -2.31430100 |

|    |             |             |             |
|----|-------------|-------------|-------------|
| H  | -0.91783000 | 3.10448700  | -1.81529400 |
| H  | 0.03494100  | 2.63578500  | -3.25875700 |
| H  | 0.19697300  | 4.25955800  | -2.57766200 |
| O  | 2.49048200  | 2.78775500  | 1.96215400  |
| Pd | 1.06075400  | 0.71285000  | -1.16575500 |
| C  | -3.08494400 | 1.76067700  | 2.06942800  |
| C  | -2.62290300 | 0.81423700  | 1.14841800  |
| C  | -3.55629000 | -0.01217200 | 0.52097600  |
| C  | -4.91617300 | 0.10689000  | 0.79271900  |
| C  | -5.35737700 | 1.07625200  | 1.68873900  |
| C  | -4.44088100 | 1.90383700  | 2.33024300  |
| H  | -2.35456700 | 2.39294700  | 2.57400100  |
| H  | -5.63188200 | -0.55597700 | 0.30991200  |
| H  | -6.42301700 | 1.17326300  | 1.88975000  |
| H  | -4.78142400 | 2.65580200  | 3.03955900  |
| I  | -2.96269400 | -1.59275600 | -0.80066300 |
| C  | -1.13605800 | 0.76457900  | 0.92176400  |
| O  | -0.37997200 | 0.62730300  | 1.88269500  |
| O  | -0.80251900 | 0.93885900  | -0.31284000 |
| O  | 2.65014300  | 0.62251700  | -2.34280400 |
| C  | 3.14499800  | -0.65930400 | -2.60164500 |
| H  | 3.65268000  | -1.11034700 | -1.73081500 |
| H  | 3.90127300  | -0.55390800 | -3.39816700 |
| H  | 2.37458100  | -1.35932800 | -2.96793900 |

### TS<sub>1</sub>

E (M06-SMD/BS1) = -1360.520576 au

H (M06-SMD/BS1) = -1360.134626 au

G (M06-SMD/BS1) = -1360.222711 au

E (M06-SMD/BS2//M06-SMD/BS1) = -1647.391502 au

|   |            |             |             |
|---|------------|-------------|-------------|
| C | 3.86588600 | 0.73956700  | -1.65876000 |
| C | 2.69300300 | 0.59685000  | -0.92710000 |
| C | 2.05357100 | 1.78790400  | -0.43714100 |
| C | 2.59761400 | 3.06004700  | -0.78341400 |
| C | 3.75913000 | 3.15272600  | -1.58030500 |
| C | 4.38218000 | 2.00264200  | -1.99449500 |
| H | 4.38680400 | -0.14839400 | -2.00141900 |
| C | 1.94484100 | 4.21307300  | -0.28779000 |
| H | 4.14728900 | 4.13750000  | -1.83869300 |
| H | 5.29208900 | 2.05306200  | -2.59048900 |
| C | 0.84269000 | 4.08377900  | 0.51456500  |

|    |             |             |             |
|----|-------------|-------------|-------------|
| C  | 0.39752000  | 2.78304100  | 0.82462200  |
| H  | 2.34289000  | 5.19348900  | -0.55025700 |
| H  | 0.32088600  | 4.94909200  | 0.91661200  |
| H  | -0.46887000 | 2.64833200  | 1.47676000  |
| N  | 0.96573200  | 1.68530000  | 0.37299800  |
| N  | 2.18084500  | -0.66436800 | -0.60324900 |
| C  | 2.43797400  | -1.79870400 | -1.30575600 |
| C  | 1.98342300  | -3.06425300 | -0.59278400 |
| H  | 2.50801000  | -3.91557700 | -1.06512300 |
| H  | 0.90388400  | -3.21696500 | -0.73720900 |
| C  | 2.36226300  | -3.14484200 | 0.84145800  |
| H  | 3.42939100  | -3.05275700 | 1.04177300  |
| C  | 1.57043500  | -3.94907000 | 1.77211400  |
| H  | 0.49046200  | -3.83173900 | 1.62214700  |
| H  | 1.85018900  | -3.78607900 | 2.81659300  |
| H  | 1.82224600  | -4.99936700 | 1.52638500  |
| O  | 2.95581800  | -1.85256100 | -2.42161400 |
| Pd | 0.95886600  | -0.91739300 | 0.97505200  |
| C  | -3.18022300 | -1.36015000 | -2.48575400 |
| C  | -2.74848200 | -0.69076300 | -1.33464000 |
| C  | -3.71748500 | -0.14268200 | -0.49079000 |
| C  | -5.07409100 | -0.26784800 | -0.77816400 |
| C  | -5.47934400 | -0.96657700 | -1.91137000 |
| C  | -4.53014700 | -1.51291000 | -2.76937000 |
| H  | -2.42580600 | -1.77030100 | -3.15621000 |
| H  | -5.81682200 | 0.18037100  | -0.12063700 |
| H  | -6.54204600 | -1.07185100 | -2.12372200 |
| H  | -4.84050900 | -2.05148200 | -3.66288800 |
| I  | -3.21417400 | 1.03402700  | 1.23131600  |
| C  | -1.25922600 | -0.62437600 | -1.11575000 |
| O  | -0.52912200 | -0.30760900 | -2.05842900 |
| O  | -0.88934600 | -0.96705100 | 0.06620100  |
| O  | 2.54065500  | -1.30438600 | 2.11486100  |
| C  | 3.74961500  | -0.61771100 | 1.93691100  |
| H  | 4.30879300  | -0.95610300 | 1.04725000  |
| H  | 4.37762800  | -0.80804400 | 2.82150500  |
| H  | 3.59994800  | 0.47133200  | 1.85137300  |

## TS<sub>2</sub>

E (M06-SMD/BS1) = -1360.522974 au

H (M06-SMD/BS1) = -1360.138011 au

G (M06-SMD/BS1) = -1360.228243 au

E (M06-SMD/BS2//M06-SMD/BS1) = -1647.395626 au

|    |             |             |             |
|----|-------------|-------------|-------------|
| C  | 4.33070800  | 1.29631000  | -1.06890500 |
| C  | 3.30140500  | 0.78378700  | -0.30073500 |
| C  | 3.62111300  | -0.03419200 | 0.82851600  |
| C  | 4.99202700  | -0.27084400 | 1.13894800  |
| C  | 6.01267900  | 0.29751700  | 0.34322700  |
| C  | 5.68072400  | 1.06686100  | -0.74423800 |
| H  | 4.08253000  | 1.90184000  | -1.93954400 |
| C  | 5.28075300  | -1.08549700 | 2.25853100  |
| H  | 7.05306300  | 0.10753500  | 0.60662300  |
| H  | 6.45860100  | 1.50127200  | -1.36996400 |
| C  | 4.25463200  | -1.61682600 | 2.99427600  |
| C  | 2.93124000  | -1.32952200 | 2.59879600  |
| H  | 6.32264000  | -1.27770900 | 2.51588900  |
| H  | 4.43871000  | -2.24721700 | 3.86126300  |
| H  | 2.09890200  | -1.74721100 | 3.16947400  |
| N  | 2.61414100  | -0.57560800 | 1.56731700  |
| N  | 1.95783700  | 1.02251200  | -0.65591400 |
| C  | 1.53682200  | 2.29312700  | -0.79398200 |
| C  | 0.14573200  | 2.51999900  | -1.37169800 |
| H  | 0.25618900  | 3.33859200  | -2.11746700 |
| H  | -0.53231400 | 2.93596900  | -0.61193100 |
| C  | -0.48603400 | 1.48538400  | -2.17091400 |
| H  | 0.16148700  | 0.84289600  | -2.77746100 |
| C  | -1.89437100 | 1.49278800  | -2.51016000 |
| H  | -2.52310800 | 2.02400800  | -1.78909900 |
| H  | -2.26537900 | 0.48422500  | -2.72811800 |
| H  | -1.92758500 | 2.02974200  | -3.48058700 |
| O  | 2.17982300  | 3.30074500  | -0.47180700 |
| Pd | 0.79396600  | -0.65537400 | -0.84651200 |
| C  | -2.93984200 | 2.33213300  | 1.66458000  |
| C  | -2.70345300 | 1.08165000  | 1.07935200  |
| C  | -3.80860700 | 0.30954600  | 0.70420800  |
| C  | -5.10486700 | 0.77512300  | 0.90624100  |
| C  | -5.31313300 | 2.03310100  | 1.46454200  |
| C  | -4.22811300 | 2.81493900  | 1.84577200  |
| H  | -2.07990400 | 2.92837200  | 1.96713300  |
| H  | -5.95723200 | 0.15775300  | 0.62877800  |
| H  | -6.33087600 | 2.39317500  | 1.60562300  |
| H  | -4.38377000 | 3.79665600  | 2.28896500  |

|   |             |             |             |
|---|-------------|-------------|-------------|
| I | -3.64200200 | -1.67429800 | -0.09858000 |
| C | -1.26101400 | 0.71066500  | 0.87985100  |
| O | -0.42768300 | 0.99752800  | 1.73996800  |
| O | -1.01736300 | 0.14838800  | -0.25774900 |
| O | 2.19320800  | -1.83005300 | -1.63632600 |
| C | 1.24500000  | -2.80948100 | -1.72764800 |
| H | 1.45546700  | -3.70108800 | -1.11395200 |
| H | 0.96680700  | -3.08340400 | -2.75877700 |
| H | 0.22127900  | -2.44103800 | -1.27640700 |

### 9a

E (M06-SMD/BS1) = -1044.858926 au

H (M06-SMD/BS1) = -1044.52923 au

G (M06-SMD/BS1) = -1044.601712 au

E (M06-SMD/BS2//M06-SMD/BS1) = -1045.237777 au

|   |             |             |             |
|---|-------------|-------------|-------------|
| C | -1.65432200 | 2.41914100  | -0.57714700 |
| C | -1.00355400 | 1.24886200  | -0.21921100 |
| C | -1.79322400 | 0.09887600  | 0.10631800  |
| C | -3.21008600 | 0.18388600  | 0.08368800  |
| C | -3.83484500 | 1.40302500  | -0.26204500 |
| C | -3.06092600 | 2.48890600  | -0.58647200 |
| H | -1.07090400 | 3.29425100  | -0.84093400 |
| C | -3.93914100 | -0.98517100 | 0.40478200  |
| H | -4.92268500 | 1.45614300  | -0.27246700 |
| H | -3.53035300 | 3.43130700  | -0.86370100 |
| C | -3.27821400 | -2.14345500 | 0.72401900  |
| C | -1.87048400 | -2.13954800 | 0.71239700  |
| H | -5.02815500 | -0.94441100 | 0.39073100  |
| H | -3.81341400 | -3.05541300 | 0.97614400  |
| H | -1.31113500 | -3.04610800 | 0.94725400  |
| N | -1.16154400 | -1.07123500 | 0.41336800  |
| N | 0.38846200  | 1.11419500  | -0.16996500 |
| C | 1.32820300  | 2.10496300  | -0.05462300 |
| C | 2.73557300  | 1.56625300  | 0.02333500  |
| H | 3.41557500  | 2.26631200  | -0.48503400 |
| H | 3.02770200  | 1.55491100  | 1.08516800  |
| C | 2.84011100  | 0.18784200  | -0.57795300 |
| H | 2.71498600  | 0.20509300  | -1.66763900 |
| C | 3.96649900  | -0.68466200 | -0.13342000 |
| H | 4.05166100  | -0.73379800 | 0.95888600  |
| H | 3.87516300  | -1.70305400 | -0.53665900 |

|    |             |             |             |
|----|-------------|-------------|-------------|
| H  | 4.91152800  | -0.27000600 | -0.52508100 |
| O  | 1.05060900  | 3.29946100  | 0.02192300  |
| Pd | 1.06463500  | -0.73447800 | -0.04707700 |
| O  | 1.54667900  | -0.61398200 | 1.89832800  |
| O  | 0.83360900  | -1.08502700 | -2.01591900 |
| C  | -0.22439200 | -1.93063900 | -2.35645900 |
| H  | -1.21505000 | -1.44512700 | -2.27446400 |
| H  | -0.09887100 | -2.22776800 | -3.41247100 |
| H  | -0.24935200 | -2.86207800 | -1.76097300 |
| C  | 0.76245000  | 0.13549300  | 2.77284800  |
| H  | 0.82538200  | 1.22549600  | 2.59138800  |
| H  | -0.30513100 | -0.15013600 | 2.75823100  |
| H  | 1.13235600  | -0.03659500 | 3.79834800  |

### TS<sub>3</sub>

E (M06-SMD/BS1) = -1044.824066 au  
H (M06-SMD/BS1) = -1044.496194 au  
G (M06-SMD/BS1) = -1044.568681 au  
E (M06-SMD/BS2//M06-SMD/BS1) = -1045.204914 au

|   |             |             |             |
|---|-------------|-------------|-------------|
| C | -1.51857100 | 2.21461900  | 0.16493900  |
| C | -1.05318700 | 0.98325800  | -0.25891600 |
| C | -1.98506700 | -0.07651200 | -0.48911700 |
| C | -3.37349800 | 0.18033600  | -0.29017100 |
| C | -3.80841400 | 1.45955800  | 0.12484500  |
| C | -2.89161100 | 2.45825800  | 0.34797700  |
| H | -0.79646200 | 3.00788700  | 0.35491100  |
| C | -4.27733300 | -0.88432600 | -0.51325000 |
| H | -4.87522700 | 1.63078700  | 0.26839300  |
| H | -3.21930100 | 3.44366800  | 0.67446500  |
| C | -3.79958500 | -2.10781200 | -0.90274300 |
| C | -2.40662600 | -2.25926200 | -1.06797200 |
| H | -5.34376900 | -0.71076900 | -0.36749900 |
| H | -4.46334100 | -2.95037000 | -1.08243400 |
| H | -2.00704800 | -3.22741400 | -1.37841200 |
| N | -1.52717800 | -1.29861100 | -0.87458100 |
| N | 0.32538500  | 0.75575300  | -0.41783600 |
| C | 1.05210000  | 1.51887800  | -1.26308100 |
| C | 2.55342800  | 1.29363000  | -1.27481800 |
| H | 3.02623900  | 2.29131700  | -1.34930000 |
| H | 2.83057700  | 0.77041300  | -2.20113100 |
| C | 3.17372400  | 0.67853700  | -0.09487600 |

|    |             |             |             |
|----|-------------|-------------|-------------|
| H  | 2.89992500  | 1.11087800  | 0.87394000  |
| C  | 4.50869200  | 0.08226900  | -0.15348300 |
| H  | 4.72537800  | -0.40333700 | -1.10996200 |
| H  | 4.68825500  | -0.60064200 | 0.68443300  |
| H  | 5.20947800  | 0.92776800  | -0.01577200 |
| O  | 0.56654400  | 2.32683000  | -2.06336700 |
| Pd | 1.18337000  | -0.53692900 | 0.86664200  |
| O  | 2.34138300  | -1.47141800 | -0.49311900 |
| O  | 0.33133900  | 0.30765600  | 2.46357700  |
| C  | -0.85435100 | -0.32225500 | 2.83886800  |
| H  | -1.70669400 | -0.06713700 | 2.17885700  |
| H  | -1.13386500 | 0.00578500  | 3.85600400  |
| H  | -0.76843200 | -1.42638500 | 2.87083900  |
| C  | 1.93448500  | -1.73975100 | -1.79982400 |
| H  | 1.30836400  | -0.94657900 | -2.24170000 |
| H  | 1.34541900  | -2.67345800 | -1.85118300 |
| H  | 2.81881300  | -1.86474100 | -2.45002300 |

### TS<sub>17-18</sub>

E (M06-SMD/BS1) = -1360.532226 au

H (M06-SMD/BS1) = -1360.144803 au

G (M06-SMD/BS1) = -1360.232178 au

E (M06-SMD/BS2//M06-SMD/BS1) = -1647.424154 au

|   |            |             |             |
|---|------------|-------------|-------------|
| C | 4.66813400 | 0.64764000  | 1.18624300  |
| C | 3.47754900 | 0.40483300  | 0.51260700  |
| C | 3.30612800 | -0.87719300 | -0.10527300 |
| C | 4.32233700 | -1.86463100 | -0.00086200 |
| C | 5.51670800 | -1.57255500 | 0.69530200  |
| C | 5.67265000 | -0.33575300 | 1.26900800  |
| H | 4.82077400 | 1.61173600  | 1.65678400  |
| C | 4.08638400 | -3.12046000 | -0.60494200 |
| H | 6.28986800 | -2.33685400 | 0.76347300  |
| H | 6.58906100 | -0.09631200 | 1.80669900  |
| C | 2.90585200 | -3.35452100 | -1.26143200 |
| C | 1.95695000 | -2.31928400 | -1.32773900 |
| H | 4.85412900 | -3.89090700 | -0.53342200 |
| H | 2.69060200 | -4.31134100 | -1.73035600 |
| H | 1.01156500 | -2.47812700 | -1.84534100 |
| N | 2.14421900 | -1.12960500 | -0.78611600 |
| N | 2.41387000 | 1.29571400  | 0.37797500  |
| C | 2.29996400 | 2.50065400  | 1.00279200  |



|    |             |             |             |
|----|-------------|-------------|-------------|
| C  | 0.95316200  | 3.13417200  | 0.74956800  |
| H  | 1.04502500  | 4.23099000  | 0.81383100  |
| H  | 0.29504600  | 2.83503300  | 1.58511600  |
| C  | 0.33251700  | 2.70977100  | -0.56502500 |
| H  | 0.93527200  | 3.07081300  | -1.41696100 |
| C  | -1.10673400 | 3.11916600  | -0.70978100 |
| H  | -1.73944400 | 2.69767600  | 0.08500700  |
| H  | -1.52948100 | 2.83583900  | -1.68049800 |
| H  | -1.17875000 | 4.21771500  | -0.62767500 |
| O  | 3.14936700  | 3.03230100  | 1.72770800  |
| Pd | 0.85049200  | 0.72315300  | -0.77029900 |
| C  | -5.59917500 | -0.54951500 | 0.39852900  |
| C  | -4.25067900 | -0.67257000 | 0.73397700  |
| C  | -3.30778900 | -0.15209400 | -0.14449300 |
| C  | -3.64597700 | 0.48207100  | -1.32398700 |
| C  | -5.00262200 | 0.59322000  | -1.63267000 |
| C  | -5.97540200 | 0.08200800  | -0.77849300 |
| H  | -6.33805800 | -0.96173600 | 1.08428300  |
| H  | -2.88125300 | 0.87502400  | -1.98636200 |
| H  | -5.29171400 | 1.08961200  | -2.55750200 |
| H  | -7.02912400 | 0.17654400  | -1.03274700 |
| I  | -1.27245700 | -0.40988000 | 0.57125700  |
| C  | -3.84606100 | -1.35322100 | 1.99591500  |
| O  | -4.67457300 | -1.82227100 | 2.77405000  |
| O  | -2.56562100 | -1.41526400 | 2.20806000  |
| O  | -0.82798800 | 0.31271100  | -1.89326500 |
| C  | -0.81272400 | -0.80135500 | -2.74199900 |
| H  | -1.59737300 | -0.66331900 | -3.50591100 |
| H  | -1.04306200 | -1.74638400 | -2.21696900 |
| H  | 0.15134100  | -0.92224000 | -3.26321700 |

## 18

E (M06-SMD/BS1) = -1360.547193 au

H (M06-SMD/BS1) = -1360.159447 au

G (M06-SMD/BS1) = -1360.248961 au

E (M06-SMD/BS2//M06-SMD/BS1) = -1647.433157 au

|   |            |             |             |
|---|------------|-------------|-------------|
| C | 3.65786800 | -1.63387700 | 1.24921200  |
| C | 2.84587200 | -0.67281500 | 0.66330700  |
| C | 2.99362300 | -0.43279900 | -0.74044900 |
| C | 3.96719400 | -1.13716500 | -1.49383400 |
| C | 4.78469800 | -2.09540300 | -0.85211900 |

|    |             |             |             |
|----|-------------|-------------|-------------|
| C  | 4.61804400  | -2.33183300 | 0.48990400  |
| H  | 3.55880700  | -1.83879600 | 2.30918100  |
| C  | 4.06453600  | -0.84582800 | -2.87371500 |
| H  | 5.52825800  | -2.63429400 | -1.43775700 |
| H  | 5.23664200  | -3.07319100 | 0.99296600  |
| C  | 3.23228100  | 0.08499600  | -3.44437700 |
| C  | 2.28738000  | 0.73167800  | -2.62912000 |
| H  | 4.80748200  | -1.37426500 | -3.47078300 |
| H  | 3.28578500  | 0.32566600  | -4.50293100 |
| H  | 1.60052100  | 1.47128000  | -3.04342800 |
| N  | 2.17410200  | 0.48343800  | -1.33840000 |
| N  | 1.87611300  | 0.09095000  | 1.32221100  |
| C  | 1.66825200  | 0.14264900  | 2.67008900  |
| C  | 0.42438800  | 0.92291400  | 3.03484900  |
| H  | 0.60433000  | 1.44673700  | 3.98765900  |
| H  | -0.37267400 | 0.18955900  | 3.24065800  |
| C  | -0.02692200 | 1.91296700  | 1.99246100  |
| H  | 0.67596800  | 2.76351400  | 1.89906700  |
| C  | -1.45188900 | 2.35279800  | 2.08363000  |
| H  | -2.14954600 | 1.50530300  | 2.05222600  |
| H  | -1.72077700 | 3.07037200  | 1.29950200  |
| H  | -1.59685400 | 2.85722900  | 3.05534100  |
| O  | 2.37872700  | -0.38597800 | 3.52761700  |
| Pd | 0.67938800  | 1.22375900  | 0.14920100  |
| C  | -5.17591100 | -0.65349700 | -0.90278300 |
| C  | -3.91693200 | -1.08529100 | -0.48285600 |
| C  | -2.89017600 | -0.14771300 | -0.46258900 |
| C  | -3.05720300 | 1.17201300  | -0.84490700 |
| C  | -4.32833400 | 1.57002700  | -1.26083600 |
| C  | -5.38460100 | 0.66421500  | -1.28661100 |
| H  | -5.98420400 | -1.38306500 | -0.92254200 |
| H  | -2.22347000 | 1.87314400  | -0.84059700 |
| H  | -4.48342200 | 2.60286400  | -1.56878000 |
| H  | -6.37200300 | 0.98581600  | -1.61233100 |
| I  | -0.98081300 | -0.87979500 | 0.22093600  |
| C  | -3.70303700 | -2.51748200 | -0.09018100 |
| O  | -4.64988500 | -3.31405700 | -0.11018100 |
| O  | -2.50390400 | -2.82592300 | 0.24519200  |
| O  | -0.28260000 | 2.47571600  | -1.09988100 |
| C  | 0.45835600  | 3.65410900  | -1.03551800 |
| H  | 0.18780500  | 4.28909400  | -0.17001000 |

|   |            |            |             |
|---|------------|------------|-------------|
| H | 0.30024800 | 4.24782600 | -1.95337600 |
| H | 1.55321000 | 3.46469600 | -0.97688400 |

**TS<sub>18-19</sub>**

E (M06-SMD/BS1) = -1360.544627 au  
H (M06-SMD/BS1) = -1360.157707 au  
G (M06-SMD/BS1) = -1360.244617 au  
E (M06-SMD/BS2//M06-SMD/BS1) = -1647.430003 au

|    |             |             |             |
|----|-------------|-------------|-------------|
| C  | -3.68269800 | -2.29724900 | -0.05417200 |
| C  | -2.95512600 | -1.12357600 | -0.16275600 |
| C  | -3.41737700 | 0.02440600  | 0.54382100  |
| C  | -4.61290300 | -0.02290700 | 1.30353800  |
| C  | -5.33710000 | -1.23532200 | 1.37348900  |
| C  | -4.86766800 | -2.34150700 | 0.70922400  |
| H  | -3.33987800 | -3.18977200 | -0.56633600 |
| C  | -5.00783200 | 1.15685000  | 1.97309800  |
| H  | -6.24929400 | -1.27247000 | 1.96726400  |
| H  | -5.41163300 | -3.28265100 | 0.76839300  |
| C  | -4.24005100 | 2.29221800  | 1.88279600  |
| C  | -3.06424100 | 2.25513600  | 1.11484800  |
| H  | -5.92444100 | 1.14657500  | 2.56224100  |
| H  | -4.51760500 | 3.21082200  | 2.39294500  |
| H  | -2.42333200 | 3.13277600  | 1.02834300  |
| N  | -2.67378700 | 1.16947500  | 0.47295300  |
| N  | -1.78958500 | -0.94064200 | -0.91823200 |
| C  | -1.50242000 | -1.64374800 | -2.04689200 |
| C  | -0.27339500 | -1.11809400 | -2.75142600 |
| H  | -0.42281300 | -1.22940100 | -3.83877900 |
| H  | 0.59063800  | -1.75026300 | -2.49659400 |
| C  | 0.00516700  | 0.32307700  | -2.47224100 |
| H  | -0.80743900 | 0.99878900  | -2.78624600 |
| O  | -2.14912500 | -2.59570900 | -2.48849600 |
| Pd | -0.72034100 | 0.73499800  | -0.45332100 |
| C  | 5.45882100  | 0.31439700  | 0.70825600  |
| C  | 4.25458300  | -0.39098400 | 0.77036700  |
| C  | 3.09696400  | 0.29554300  | 0.41608700  |
| C  | 3.09212800  | 1.62874200  | 0.03884300  |
| C  | 4.31146400  | 2.30349000  | -0.00628200 |
| C  | 5.49380300  | 1.64662200  | 0.31987000  |
| H  | 6.36935200  | -0.21593900 | 0.98254700  |
| H  | 2.15767400  | 2.14073400  | -0.18783600 |

|   |             |             |             |
|---|-------------|-------------|-------------|
| H | 4.32610300  | 3.35282300  | -0.29666600 |
| H | 6.44323800  | 2.17748300  | 0.28140900  |
| I | 1.24855900  | -0.81896600 | 0.46300600  |
| C | 4.25561600  | -1.82388700 | 1.24143600  |
| O | 5.34237400  | -2.37936100 | 1.47133000  |
| O | 3.10962800  | -2.36202600 | 1.38080800  |
| O | 0.08323600  | 2.48444900  | 0.09610400  |
| C | -0.29819300 | 3.48266900  | -0.80103700 |
| H | 0.26936200  | 3.44763400  | -1.75156600 |
| H | -0.11409900 | 4.47002900  | -0.34313400 |
| H | -1.37617500 | 3.44674200  | -1.05942600 |
| C | 1.36155700  | 0.83129200  | -2.79033700 |
| H | 1.43034400  | 0.85050500  | -3.89426400 |
| H | 2.16197600  | 0.17785000  | -2.42389200 |
| H | 1.52820600  | 1.85937100  | -2.44916000 |

## 19

E (M06-SMD/BS1) = -1360.55137 au

H (M06-SMD/BS1) = -1360.163366 au

G (M06-SMD/BS1) = -1360.251601 au

E (M06-SMD/BS2//M06-SMD/BS1) = -1647.433692 au

|   |             |             |             |
|---|-------------|-------------|-------------|
| C | -4.25458000 | -1.17578700 | 1.25862600  |
| C | -3.19585300 | -0.62299200 | 0.56810800  |
| C | -3.32439200 | 0.69864500  | 0.06658900  |
| C | -4.52448600 | 1.43022300  | 0.22435500  |
| C | -5.59156200 | 0.83070600  | 0.93477800  |
| C | -5.44550300 | -0.43801900 | 1.44026300  |
| H | -4.17220200 | -2.18214700 | 1.65878500  |
| C | -4.57694500 | 2.72206800  | -0.34541500 |
| H | -6.51372700 | 1.39288800  | 1.07329500  |
| H | -6.26279200 | -0.89808000 | 1.99269800  |
| C | -3.48989300 | 3.22324100  | -1.01987700 |
| C | -2.32137100 | 2.44884500  | -1.11308100 |
| H | -5.48889000 | 3.30909300  | -0.24184300 |
| H | -3.50454600 | 4.21174300  | -1.47057500 |
| H | -1.43207900 | 2.82925600  | -1.61208400 |
| N | -2.24955700 | 1.23751100  | -0.59121000 |
| N | -1.98757300 | -1.25361000 | 0.22547800  |
| C | -2.01320100 | -2.46452700 | -0.40267800 |
| C | -0.82852100 | -2.62316300 | -1.32682500 |
| H | -1.09878700 | -3.31880500 | -2.13972600 |

|    |             |             |             |
|----|-------------|-------------|-------------|
| H  | 0.03785900  | -3.06272400 | -0.81262000 |
| C  | -0.49248900 | -1.31923300 | -1.96035300 |
| H  | -1.33694700 | -0.79683200 | -2.42255700 |
| O  | -2.90590200 | -3.30273900 | -0.29929400 |
| Pd | -0.52464000 | 0.14097100  | -0.17820300 |
| C  | 4.77596000  | 1.46621800  | -0.11517300 |
| C  | 3.87959800  | 0.39192800  | -0.07223200 |
| C  | 3.02835400  | 0.33441500  | 1.02984000  |
| C  | 3.05335800  | 1.27730400  | 2.05364300  |
| C  | 3.98242600  | 2.31136800  | 1.99627100  |
| C  | 4.84289600  | 2.40509300  | 0.90613900  |
| H  | 5.43260300  | 1.54732600  | -0.98048600 |
| H  | 2.34788400  | 1.21530800  | 2.88042600  |
| H  | 4.01850900  | 3.04723000  | 2.79765500  |
| H  | 5.56321100  | 3.21936600  | 0.84673000  |
| I  | 1.47347600  | -1.13437100 | 1.17422600  |
| C  | 3.89826200  | -0.59761000 | -1.22930000 |
| O  | 4.03100800  | -0.09845600 | -2.37198600 |
| O  | 3.79322400  | -1.81487700 | -0.94323200 |
| O  | 0.65424100  | 1.74600300  | -0.29661700 |
| C  | 1.15833200  | 2.12091900  | -1.53740300 |
| H  | 1.99793700  | 1.48277600  | -1.87384500 |
| H  | 1.54827100  | 3.15184900  | -1.46030500 |
| H  | 0.39477900  | 2.12809300  | -2.34207200 |
| C  | 0.80903600  | -1.14635300 | -2.61509500 |
| H  | 1.64039700  | -1.60208500 | -2.06532200 |
| H  | 1.02745800  | -0.10902300 | -2.88897300 |
| H  | 0.70304400  | -1.69473000 | -3.57378200 |

## 20

E (M06-SMD/BS1) = -1360.560484 au

H (M06-SMD/BS1) = -1360.171973 au

G (M06-SMD/BS1) = -1360.25975 au

E (M06-SMD/BS2//M06-SMD/BS1) = -1647.436952 au

|   |             |            |             |
|---|-------------|------------|-------------|
| C | -3.28335600 | 0.86911600 | 2.17368300  |
| C | -2.51834000 | 0.36922400 | 1.14245300  |
| C | -2.83124500 | 0.75843700 | -0.18424600 |
| C | -3.92617300 | 1.60468000 | -0.47092300 |
| C | -4.69430000 | 2.09456500 | 0.61240200  |
| C | -4.36663800 | 1.73490000 | 1.89687400  |
| H | -3.05600500 | 0.59178500 | 3.19950100  |

|    |             |             |             |
|----|-------------|-------------|-------------|
| C  | -4.17788800 | 1.90105400  | -1.82947900 |
| H  | -5.53354300 | 2.75698000  | 0.40614900  |
| H  | -4.95261800 | 2.11680900  | 2.73092200  |
| C  | -3.37245700 | 1.37900900  | -2.81333300 |
| C  | -2.28171000 | 0.56958800  | -2.45307900 |
| H  | -5.01696000 | 2.54804200  | -2.08294900 |
| H  | -3.54635000 | 1.59060400  | -3.86479500 |
| H  | -1.59243800 | 0.17099100  | -3.19544400 |
| N  | -2.03804800 | 0.27801000  | -1.18935300 |
| N  | -1.48235500 | -0.58173200 | 1.23990800  |
| C  | -1.79666000 | -1.81241600 | 1.75400400  |
| C  | -1.08237900 | -2.91264700 | 1.01449900  |
| H  | -1.65075800 | -3.84968500 | 1.12742700  |
| H  | -0.08824600 | -3.10151400 | 1.44872100  |
| C  | -0.99530800 | -2.57340200 | -0.45241300 |
| H  | -1.97896900 | -2.37301600 | -0.89498500 |
| O  | -2.61432600 | -2.01113900 | 2.64958600  |
| Pd | -0.29118500 | -0.51753700 | -0.44401500 |
| C  | 3.28406700  | 3.06096800  | 0.30441300  |
| C  | 2.51300200  | 1.90778400  | 0.48419300  |
| C  | 3.12314600  | 0.68627000  | 0.21334000  |
| C  | 4.43365000  | 0.58546600  | -0.24048800 |
| C  | 5.16764300  | 1.75236400  | -0.43501200 |
| C  | 4.59174600  | 2.98881600  | -0.15931500 |
| H  | 2.83021100  | 4.02636200  | 0.52848400  |
| H  | 4.88165300  | -0.38731700 | -0.43521200 |
| H  | 6.19202500  | 1.68659300  | -0.79687300 |
| H  | 5.16567900  | 3.90271400  | -0.30192200 |
| I  | 2.12545700  | -1.16577500 | 0.63730800  |
| C  | 1.07716700  | 2.08863000  | 0.92412400  |
| O  | 0.87680200  | 2.60337100  | 2.03624500  |
| O  | 0.18742100  | 1.75524700  | 0.07829000  |
| O  | 0.71064600  | -0.09157200 | -2.15201600 |
| C  | 0.87742600  | -1.03609300 | -3.15334900 |
| H  | 1.54346200  | -1.87182600 | -2.86595500 |
| H  | 1.34569800  | -0.53631700 | -4.02045300 |
| H  | -0.07716200 | -1.46749700 | -3.51777900 |
| C  | -0.15395200 | -3.48821000 | -1.27099400 |
| H  | 0.87576800  | -3.57109900 | -0.90120700 |
| H  | -0.14934200 | -3.24052100 | -2.33504000 |
| H  | -0.61300200 | -4.48913800 | -1.17609800 |

**TS<sub>4</sub>**

E (M06-SMD/BS1) = -1360.515903 au  
H (M06-SMD/BS1) = -1360.129131 au  
G (M06-SMD/BS1) = -1360.217926 au  
E (M06-SMD/BS2//M06-SMD/BS1) = -1647.398345 au

|    |             |             |             |
|----|-------------|-------------|-------------|
| C  | -3.98047400 | -1.03590900 | 1.90568900  |
| C  | -3.03337000 | -0.57797000 | 1.02086700  |
| C  | -3.22304400 | 0.67827700  | 0.39598300  |
| C  | -4.38003600 | 1.45178900  | 0.64100900  |
| C  | -5.33364600 | 0.95509700  | 1.56264200  |
| C  | -5.12815000 | -0.25627600 | 2.17839400  |
| H  | -3.84550300 | -2.00424300 | 2.38456000  |
| C  | -4.49615700 | 2.67952700  | -0.05019200 |
| H  | -6.21950900 | 1.55154800  | 1.77603000  |
| H  | -5.86225800 | -0.63433900 | 2.88741600  |
| C  | -3.51088600 | 3.07232800  | -0.92423800 |
| C  | -2.38220800 | 2.25254100  | -1.10657200 |
| H  | -5.37357100 | 3.30291000  | 0.11888700  |
| H  | -3.57779000 | 4.00790800  | -1.47283300 |
| H  | -1.57593800 | 2.53581300  | -1.78219300 |
| N  | -2.24300600 | 1.10937900  | -0.46021100 |
| N  | -1.87970100 | -1.28703400 | 0.59802000  |
| C  | -2.11163000 | -2.24583200 | -0.36351400 |
| C  | -0.94454500 | -2.53731900 | -1.31213100 |
| H  | -1.22454300 | -3.42695500 | -1.91367300 |
| H  | -0.03115900 | -2.81869700 | -0.77651300 |
| C  | -0.66813100 | -1.52878700 | -2.38671400 |
| O  | -3.18244800 | -2.83160800 | -0.51042500 |
| Pd | -0.50969100 | -0.02450500 | -0.24554500 |
| C  | 4.72853500  | 1.97396300  | 0.08210200  |
| C  | 4.11681700  | 0.74162400  | 0.33920500  |
| C  | 2.77977900  | 0.77353600  | 0.72483500  |
| C  | 2.06725300  | 1.95852600  | 0.87779000  |
| C  | 2.71276600  | 3.16858800  | 0.63720100  |
| C  | 4.04577700  | 3.17379300  | 0.23576000  |
| H  | 5.76847700  | 1.96717900  | -0.24088600 |
| H  | 1.01615100  | 1.93867600  | 1.16708100  |
| H  | 2.16710800  | 4.10239700  | 0.76238900  |
| H  | 4.55417400  | 4.11643300  | 0.04000700  |
| I  | 1.67092400  | -1.04906700 | 0.98115100  |

|   |             |             |             |
|---|-------------|-------------|-------------|
| C | 4.93910100  | -0.52973500 | 0.18944700  |
| O | 5.83435500  | -0.51564500 | -0.68472300 |
| O | 4.65588300  | -1.47279900 | 0.97155200  |
| O | 0.33146400  | 0.47072100  | -2.06767900 |
| C | -1.78137500 | -0.97841600 | -3.16940600 |
| H | -2.64156700 | -0.67648600 | -2.56031500 |
| H | -2.11831700 | -1.81739000 | -3.80719300 |
| H | -1.46803400 | -0.16714000 | -3.83090100 |
| H | 0.27781900  | -1.68446600 | -2.90600000 |
| C | 1.68152500  | 0.37616700  | -2.41321500 |
| H | 2.18528600  | -0.51142400 | -1.98902700 |
| H | 2.23906900  | 1.26694800  | -2.07459200 |
| H | 1.77443600  | 0.32425200  | -3.51226800 |

### TS<sub>5</sub>

E (M06-SMD/BS1) = -1360.523083 au  
H (M06-SMD/BS1) = -1360.136401 au  
G (M06-SMD/BS1) = -1360.223392 au  
E (M06-SMD/BS2//M06-SMD/BS1) = -1647.39785 au

|   |             |             |             |
|---|-------------|-------------|-------------|
| C | -3.75023400 | -0.25514200 | 2.06764100  |
| C | -2.80501700 | -0.20599000 | 1.07182500  |
| C | -2.91693800 | 0.77922600  | 0.06126500  |
| C | -3.99596300 | 1.68976500  | 0.03947600  |
| C | -4.95008800 | 1.61795300  | 1.08376700  |
| C | -4.81987300 | 0.67066100  | 2.07050800  |
| H | -3.67662600 | -1.01624500 | 2.84281200  |
| C | -4.03710600 | 2.61978200  | -1.02410100 |
| H | -5.77556400 | 2.32835400  | 1.09168400  |
| H | -5.55468700 | 0.61971500  | 2.87184800  |
| C | -3.05643300 | 2.60685500  | -1.98672800 |
| C | -2.00517900 | 1.67714700  | -1.89058900 |
| H | -4.85319800 | 3.34032500  | -1.06807400 |
| H | -3.06613600 | 3.30734800  | -2.81744700 |
| H | -1.20136800 | 1.64829900  | -2.62484300 |
| N | -1.93900500 | 0.80729600  | -0.89900400 |
| N | -1.72734800 | -1.11403100 | 0.89624300  |
| C | -2.05739600 | -2.26913700 | 0.22375000  |
| C | -0.94422500 | -2.94952100 | -0.58236100 |
| H | -1.33926300 | -3.94151800 | -0.87934200 |
| H | -0.05559500 | -3.16764300 | 0.02584700  |
| C | -0.56687500 | -2.35162500 | -1.90949000 |



|    |             |             |             |
|----|-------------|-------------|-------------|
| H  | -1.33421400 | -1.77472800 | -2.42912100 |
| O  | -3.18380200 | -2.76440300 | 0.22222800  |
| Pd | -0.28850000 | -0.29785000 | -0.29562900 |
| C  | 3.63929100  | 2.65970400  | -0.16576000 |
| C  | 2.67784700  | 1.76394100  | 0.32091200  |
| C  | 3.12339900  | 0.48364500  | 0.64693600  |
| C  | 4.45030100  | 0.09099500  | 0.49745800  |
| C  | 5.38436500  | 1.01548000  | 0.04173500  |
| C  | 4.97547200  | 2.30447300  | -0.28802200 |
| H  | 3.30900400  | 3.65806100  | -0.45031800 |
| H  | 4.75512000  | -0.92859100 | 0.72803600  |
| H  | 6.42621700  | 0.71871300  | -0.06546800 |
| H  | 5.69764900  | 3.03098900  | -0.65649100 |
| I  | 1.78208100  | -1.06745900 | 1.28889200  |
| C  | 1.24077900  | 2.25835100  | 0.40316100  |
| O  | 0.61590800  | 2.04951100  | 1.47327100  |
| O  | 0.81850300  | 2.86009100  | -0.61429800 |
| O  | 0.58240300  | -0.46979300 | -2.16588900 |
| C  | 0.38788800  | -3.11706900 | -2.71947000 |
| H  | 1.31322400  | -3.33239700 | -2.16722500 |
| H  | 0.60644000  | -2.64519700 | -3.67967600 |
| H  | -0.08972200 | -4.09356800 | -2.91299200 |
| C  | 1.95909700  | -0.57916000 | -2.37661000 |
| H  | 2.43968500  | -1.35590800 | -1.75435100 |
| H  | 2.45977300  | 0.37876800  | -2.14802000 |
| H  | 2.16169400  | -0.81646800 | -3.43417400 |

### TS<sub>6</sub>

E (M06-SMD/BS1) = -1360.551752 au

H (M06-SMD/BS1) = -1360.164386 au

G (M06-SMD/BS1) = -1360.251364 au

E (M06-SMD/BS2//M06-SMD/BS1) = -1647.432426 au

|   |             |             |             |
|---|-------------|-------------|-------------|
| C | -4.00154500 | -1.86588700 | 0.68556200  |
| C | -3.01422000 | -0.98598600 | 0.28527700  |
| C | -3.39221200 | 0.34155500  | -0.05144300 |
| C | -4.74818500 | 0.74700100  | -0.03845800 |
| C | -5.73155200 | -0.18733700 | 0.36223500  |
| C | -5.35243900 | -1.45650900 | 0.72409500  |
| H | -3.73821200 | -2.87842400 | 0.97428900  |
| C | -5.03469600 | 2.07803100  | -0.41625600 |
| H | -6.77481600 | 0.12337000  | 0.38893900  |

|    |             |             |             |
|----|-------------|-------------|-------------|
| H  | -6.10334000 | -2.17450900 | 1.04905800  |
| C  | -4.01587100 | 2.92937900  | -0.76789000 |
| C  | -2.69101400 | 2.46482200  | -0.72820600 |
| H  | -6.07072500 | 2.41499000  | -0.41824300 |
| H  | -4.20698600 | 3.95863200  | -1.05920600 |
| H  | -1.85308300 | 3.12120800  | -0.95674300 |
| N  | -2.39904400 | 1.22137000  | -0.39015200 |
| N  | -1.64237700 | -1.25727500 | 0.13065100  |
| C  | -1.25407500 | -2.41953200 | -0.44978600 |
| C  | 0.19085700  | -2.39131000 | -0.97417800 |
| H  | 0.27232400  | -3.21619300 | -1.69590900 |
| H  | 0.90027400  | -2.55583700 | -0.15596900 |
| C  | 0.43842000  | -1.12866000 | -1.68965900 |
| H  | 1.17423500  | -0.40352800 | -1.34765600 |
| O  | -1.95565100 | -3.41375200 | -0.61887600 |
| Pd | -0.53790000 | 0.48766700  | 0.15383000  |
| C  | 4.58505200  | 0.38202600  | -1.37023900 |
| C  | 3.65813500  | -0.26424500 | -0.54381600 |
| C  | 3.15476800  | 0.46328300  | 0.53562600  |
| C  | 3.56122600  | 1.76494300  | 0.81384500  |
| C  | 4.51464900  | 2.36512000  | -0.00389300 |
| C  | 5.02257800  | 1.67263600  | -1.09914000 |
| H  | 4.97022100  | -0.15890800 | -2.23455600 |
| H  | 3.13011300  | 2.31240700  | 1.64980500  |
| H  | 4.84612600  | 3.37904000  | 0.21291700  |
| H  | 5.75772700  | 2.14248000  | -1.75033200 |
| I  | 1.56865300  | -0.31282600 | 1.76566600  |
| C  | 3.28329000  | -1.69602800 | -0.88776700 |
| O  | 2.82666100  | -1.88515800 | -2.05152000 |
| O  | 3.46260800  | -2.56018000 | -0.00557700 |
| O  | 0.30354700  | 2.30111600  | 0.11686600  |
| C  | 0.79729400  | 2.58491900  | -1.15555200 |
| H  | 1.58253900  | 1.87643600  | -1.48823400 |
| H  | 1.26101800  | 3.58752100  | -1.14459600 |
| H  | 0.00955700  | 2.60479000  | -1.93614000 |
| C  | -0.20451900 | -0.86803500 | -2.97131500 |
| H  | -0.36586900 | 0.20117400  | -3.15142700 |
| H  | -1.11902000 | -1.45340700 | -3.12596100 |
| H  | 0.52968800  | -1.20012500 | -3.73137900 |

E (M06-SMD/BS1) = -1476.223768 au  
 H (M06-SMD/BS1) = -1475.777946 au  
 G (M06-SMD/BS1) = -1475.877997 au  
 E (M06-SMD/BS2//M06-SMD/BS1) = -1763.157064 au

|    |             |             |             |
|----|-------------|-------------|-------------|
| C  | 4.27737900  | 0.27197100  | 1.79321500  |
| C  | 3.20748400  | 0.10913300  | 0.93626400  |
| C  | 3.43098800  | -0.52261600 | -0.31642600 |
| C  | 4.72482400  | -0.93758600 | -0.70973900 |
| C  | 5.79845800  | -0.74822200 | 0.19188900  |
| C  | 5.56629700  | -0.16334800 | 1.41268900  |
| H  | 4.12661800  | 0.73841100  | 2.76215200  |
| C  | 4.86046300  | -1.51719000 | -1.99128300 |
| H  | 6.79490400  | -1.07746900 | -0.09866100 |
| H  | 6.38896100  | -0.02408500 | 2.11177000  |
| C  | 3.76185600  | -1.66454500 | -2.80322700 |
| C  | 2.50266300  | -1.25135200 | -2.33643900 |
| H  | 5.84628000  | -1.84246500 | -2.32203300 |
| H  | 3.83968100  | -2.10506500 | -3.79339200 |
| H  | 1.60288400  | -1.38309000 | -2.93546600 |
| N  | 2.35455200  | -0.70282100 | -1.14449300 |
| N  | 1.89149600  | 0.56607700  | 1.12728200  |
| C  | 1.67645500  | 1.86394500  | 1.49341500  |
| C  | 0.36781200  | 2.40175700  | 0.93575400  |
| H  | 0.46498900  | 3.49487700  | 0.84788800  |
| H  | -0.47288800 | 2.19269200  | 1.60896300  |
| C  | 0.13003200  | 1.85100700  | -0.42981600 |
| O  | 2.45988700  | 2.56001100  | 2.13250400  |
| Pd | 0.57612700  | -0.40625500 | -0.11538900 |
| C  | -4.75422600 | -0.70240900 | -0.98987500 |
| C  | -3.74419200 | -0.27332200 | -0.12145300 |
| C  | -3.02485900 | -1.26041200 | 0.54815400  |
| C  | -3.27565200 | -2.61850900 | 0.37768100  |
| C  | -4.30840800 | -3.01183900 | -0.46775300 |
| C  | -5.04822900 | -2.05009000 | -1.15046900 |
| H  | -5.31083900 | 0.05220600  | -1.54418500 |
| H  | -2.66741900 | -3.36233000 | 0.88919000  |
| H  | -4.52085700 | -4.07129200 | -0.59942500 |
| H  | -5.84957200 | -2.35274600 | -1.82225500 |
| I  | -1.35078700 | -0.76465900 | 1.78853300  |
| C  | -3.46221100 | 1.21171000  | -0.01630000 |
| O  | -3.40694300 | 1.82502200  | -1.12005000 |

|   |             |             |             |
|---|-------------|-------------|-------------|
| O | -3.30214500 | 1.71167600  | 1.11639300  |
| O | -0.49740000 | -1.52506500 | -1.38057600 |
| C | -1.07782200 | -0.82147100 | -2.43527800 |
| H | -1.80358600 | -0.05352200 | -2.10398100 |
| H | -1.63506200 | -1.53491500 | -3.06858900 |
| H | -0.33453500 | -0.32309100 | -3.09057600 |
| H | -0.89483200 | 1.58111400  | -0.70423000 |
| C | -1.73581700 | 4.11798100  | -2.33317100 |
| H | -1.48634500 | 3.18738000  | -2.87435900 |
| H | -0.98770900 | 4.87705000  | -2.59358100 |
| H | -2.71526300 | 4.46655400  | -2.69952500 |
| O | -1.72740900 | 3.94314500  | -0.93521500 |
| H | -2.42453900 | 3.26509900  | -0.76552600 |
| C | 1.03571700  | 2.24035400  | -1.52625600 |
| H | 0.74537600  | 3.27418400  | -1.79071800 |
| H | 0.90924500  | 1.62716200  | -2.42519700 |
| H | 2.09006100  | 2.27720800  | -1.22604600 |

### TS<sub>21-22</sub>

E (M06-SMD/BS1) = -1476.224708 au

H (M06-SMD/BS1) = -1475.779829 au

G (M06-SMD/BS1) = -1475.875779 au

E (M06-SMD/BS2//M06-SMD/BS1) = -1763.157196 au

|   |            |             |             |
|---|------------|-------------|-------------|
| C | 4.30457100 | 0.95283300  | 1.51775800  |
| C | 3.24015000 | 0.46990000  | 0.78224500  |
| C | 3.48499900 | -0.55766600 | -0.16768100 |
| C | 4.79104800 | -1.04966300 | -0.39993900 |
| C | 5.85746900 | -0.52549700 | 0.36764700  |
| C | 5.60571800 | 0.44581600  | 1.30534100  |
| H | 4.14018500 | 1.72729700  | 2.26044900  |
| C | 4.94513200 | -2.04194500 | -1.39416900 |
| H | 6.86351300 | -0.90874000 | 0.20417500  |
| H | 6.42266500 | 0.84513100  | 1.90380500  |
| C | 3.85185900 | -2.49717900 | -2.09057800 |
| C | 2.58101600 | -1.98090500 | -1.78681400 |
| H | 5.94023700 | -2.43649400 | -1.59714500 |
| H | 3.94286100 | -3.25788500 | -2.86123100 |
| H | 1.68606800 | -2.34375300 | -2.28960700 |
| N | 2.41440800 | -1.04931500 | -0.86564000 |
| N | 1.91108800 | 0.92665900  | 0.81030700  |
| C | 1.65942300 | 2.26445500  | 0.76036800  |

|    |             |             |             |
|----|-------------|-------------|-------------|
| C  | 0.31876400  | 2.57578200  | 0.11049200  |
| H  | 0.39472500  | 3.58547100  | -0.32048200 |
| C  | 0.04247800  | 1.62486000  | -0.99903700 |
| O  | 2.42895600  | 3.14982600  | 1.12466400  |
| Pd | 0.62146100  | -0.46515700 | 0.00489900  |
| C  | -4.69305300 | -1.15247000 | -0.94465700 |
| C  | -3.71749500 | -0.44336100 | -0.23510800 |
| C  | -3.01372700 | -1.14062800 | 0.74427700  |
| C  | -3.24978100 | -2.48335200 | 1.02407200  |
| C  | -4.24887200 | -3.15229000 | 0.32398600  |
| C  | -4.97103400 | -2.48307600 | -0.66053500 |
| H  | -5.23603400 | -0.63299900 | -1.73350400 |
| H  | -2.65562200 | -3.00493500 | 1.77236300  |
| H  | -4.44938900 | -4.19943800 | 0.54326800  |
| H  | -5.74655600 | -3.00466800 | -1.21874600 |
| I  | -1.39954700 | -0.22760300 | 1.81875000  |
| C  | -3.45678600 | 1.00027200  | -0.61195900 |
| O  | -3.27908700 | 1.20601400  | -1.84718200 |
| O  | -3.43495000 | 1.85568200  | 0.29615600  |
| O  | -0.37874100 | -2.00517100 | -0.78422400 |
| C  | -0.98689800 | -1.72270300 | -2.00694100 |
| H  | -1.67626200 | -0.85827200 | -1.96339900 |
| H  | -1.59323300 | -2.59647800 | -2.30769000 |
| H  | -0.26061000 | -1.53612100 | -2.82421000 |
| H  | -0.96163200 | 1.20580200  | -1.09802000 |
| C  | -2.19252800 | 4.53428700  | -1.26373900 |
| H  | -3.14063700 | 4.93153900  | -1.66168100 |
| H  | -1.44314000 | 5.33365400  | -1.31957600 |
| H  | -2.35091000 | 4.28262400  | -0.20295200 |
| O  | -1.72404300 | 3.43894500  | -2.01509900 |
| H  | -2.40400100 | 2.72091000  | -1.97735100 |
| H  | -0.49022600 | 2.58159800  | 0.85193000  |
| C  | 0.88482800  | 1.63962000  | -2.20357800 |
| H  | 0.48101400  | 2.46705200  | -2.81641100 |
| H  | 0.78851500  | 0.72711000  | -2.80241200 |
| H  | 1.93803700  | 1.86543700  | -1.99654400 |

## 22

E (M06-SMD/BS1) = -1476.287567 au

H (M06-SMD/BS1) = -1475.837983 au

G (M06-SMD/BS1) = -1475.933348 au

E (M06-SMD/BS2//M06-SMD/BS1) = -1763.214848 au

|    |             |             |             |
|----|-------------|-------------|-------------|
| C  | 4.17404900  | 0.74701800  | 1.46234000  |
| C  | 3.10400200  | 0.28695500  | 0.70997400  |
| C  | 3.35485100  | -0.78261200 | -0.19740300 |
| C  | 4.65776500  | -1.30212900 | -0.39531300 |
| C  | 5.72367300  | -0.78027800 | 0.37261200  |
| C  | 5.46726100  | 0.20913600  | 1.28896000  |
| H  | 4.02155500  | 1.53624500  | 2.18851000  |
| C  | 4.81363000  | -2.33588800 | -1.34599900 |
| H  | 6.72518800  | -1.18487800 | 0.23379100  |
| H  | 6.27675500  | 0.60300000  | 1.90179200  |
| C  | 3.72335000  | -2.81538500 | -2.02887900 |
| C  | 2.45475300  | -2.28122100 | -1.74922400 |
| H  | 5.80805600  | -2.74628000 | -1.51972400 |
| H  | 3.81422600  | -3.61113800 | -2.76350300 |
| H  | 1.55739800  | -2.67108000 | -2.22634100 |
| N  | 2.28625800  | -1.30406700 | -0.87643700 |
| N  | 1.78329500  | 0.77152600  | 0.70506300  |
| C  | 1.55617700  | 2.10063200  | 0.88075800  |
| C  | 0.23568300  | 2.64382300  | 0.38239800  |
| H  | 0.08384700  | 3.60626000  | 0.88893400  |
| C  | 0.28068100  | 2.86320200  | -1.13369300 |
| O  | 2.39158800  | 2.90261300  | 1.32697000  |
| Pd | 0.50802400  | -0.69881600 | -0.02448000 |
| C  | -4.67683000 | -0.57976400 | -1.24277400 |
| C  | -3.67175200 | -0.13321100 | -0.38118200 |
| C  | -3.18227600 | -1.01059200 | 0.58625200  |
| C  | -3.67710200 | -2.30322600 | 0.70770300  |
| C  | -4.69971400 | -2.72082200 | -0.14079900 |
| C  | -5.19774200 | -1.86108600 | -1.11476900 |
| H  | -5.04800500 | 0.09454500  | -2.01341700 |
| H  | -3.26111200 | -2.98468000 | 1.44722000  |
| H  | -5.09507900 | -3.73020500 | -0.04362800 |
| H  | -5.98790500 | -2.19255700 | -1.78534600 |
| I  | -1.51288500 | -0.47666500 | 1.81384900  |
| C  | -3.12644100 | 1.24290200  | -0.55134100 |
| O  | -2.63800100 | 1.43764000  | -1.76545000 |
| O  | -3.12251800 | 2.08682100  | 0.32695300  |
| O  | -0.47885200 | -2.25218000 | -0.83005400 |
| C  | -1.02927600 | -1.88565900 | -2.05594700 |
| H  | -1.74498600 | -1.04422300 | -1.98080100 |

|   |             |             |             |
|---|-------------|-------------|-------------|
| H | -1.58842900 | -2.74181600 | -2.47638400 |
| H | -0.26569900 | -1.59998100 | -2.81007400 |
| H | 0.29039600  | 1.87689900  | -1.62781400 |
| C | -1.32234100 | 4.69876700  | -1.05933500 |
| H | -2.13253800 | 5.08189200  | -1.68841300 |
| H | -0.49589200 | 5.42229100  | -1.07306500 |
| H | -1.69671000 | 4.59370900  | -0.03146600 |
| O | -0.93613600 | 3.45491600  | -1.61732000 |
| H | -2.14618000 | 2.31484400  | -1.77229400 |
| H | -0.60638600 | 1.98522600  | 0.61989200  |
| C | 1.48581900  | 3.65594900  | -1.59953600 |
| H | 1.37868100  | 3.90714600  | -2.66229300 |
| H | 2.40087200  | 3.06018000  | -1.48395300 |
| H | 1.62089800  | 4.58361500  | -1.02750200 |

### TS<sub>22-23</sub>

E (M06-SMD/BS1) = -1476.278564 au

H (M06-SMD/BS1) = -1475.829362 au

G (M06-SMD/BS1) = -1475.921847 au

E (M06-SMD/BS2//M06-SMD/BS1) = -1763.203942 au

|   |            |             |             |
|---|------------|-------------|-------------|
| C | 4.39793300 | 0.89066200  | 1.32871200  |
| C | 3.30976300 | 0.42087300  | 0.60258900  |
| C | 3.45679600 | -0.84541000 | -0.03108900 |
| C | 4.67362800 | -1.57234500 | 0.01618600  |
| C | 5.75899600 | -1.04033300 | 0.74624800  |
| C | 5.60143100 | 0.16035500  | 1.39361600  |
| H | 4.32571100 | 1.83548100  | 1.85270500  |
| C | 4.72747900 | -2.81127800 | -0.66201700 |
| H | 6.69349100 | -1.59765600 | 0.79106700  |
| H | 6.42375900 | 0.57432800  | 1.97548700  |
| C | 3.62380600 | -3.28222800 | -1.32766800 |
| C | 2.44314400 | -2.52131100 | -1.31212800 |
| H | 5.65533700 | -3.38224000 | -0.64096800 |
| H | 3.63698400 | -4.23124600 | -1.85707600 |
| H | 1.52821600 | -2.85769900 | -1.79744100 |
| N | 2.37314000 | -1.35880000 | -0.69019500 |
| N | 2.05584100 | 1.03495200  | 0.45206900  |
| C | 1.90192100 | 2.37005800  | 0.64066900  |
| C | 0.51085700 | 2.93682600  | 0.45496600  |
| H | 0.51511400 | 3.91425600  | 0.95393300  |
| C | 0.10109300 | 3.16570200  | -0.99344700 |

|    |             |             |             |
|----|-------------|-------------|-------------|
| O  | 2.82060700  | 3.15558200  | 0.92643600  |
| Pd | 0.67300700  | -0.23257300 | -0.43413600 |
| C  | -5.15464600 | -0.99411600 | -0.52207600 |
| C  | -4.11155200 | -0.30105300 | 0.10628900  |
| C  | -3.07789400 | -1.04615700 | 0.69026500  |
| C  | -3.08953100 | -2.43735800 | 0.63594200  |
| C  | -4.12072100 | -3.10114200 | -0.02198000 |
| C  | -5.15626200 | -2.37839800 | -0.60381000 |
| H  | -5.96224900 | -0.41539400 | -0.96666200 |
| H  | -2.28875400 | -3.00688600 | 1.10340900  |
| H  | -4.11098900 | -4.18859700 | -0.06971500 |
| H  | -5.96876700 | -2.89082100 | -1.11454400 |
| I  | -1.43982800 | -0.19220700 | 1.76186400  |
| C  | -4.23491500 | 1.18087500  | 0.06149900  |
| O  | -3.08178900 | 1.82292300  | -0.12034100 |
| O  | -5.30458300 | 1.75561400  | 0.12564800  |
| O  | -0.39265500 | -1.70374500 | -1.28290900 |
| C  | -1.33678800 | -1.27013500 | -2.20161900 |
| H  | -2.04735300 | -0.52979700 | -1.78025300 |
| H  | -1.94799900 | -2.13187900 | -2.53003100 |
| H  | -0.88353200 | -0.83151500 | -3.11276600 |
| O  | -0.36809100 | 1.92594100  | -1.53006100 |
| H  | -0.25097400 | 2.31484400  | 0.94053500  |
| C  | -0.98723200 | 2.07719500  | -2.79319600 |
| H  | -1.64943500 | 1.22181400  | -2.95292600 |
| H  | -0.25128000 | 2.11629500  | -3.61014300 |
| H  | -1.59648000 | 2.99509900  | -2.81832100 |
| H  | -0.76203800 | 3.85760100  | -0.98266800 |
| C  | 1.20934700  | 3.76425300  | -1.83730600 |
| H  | 1.62505700  | 4.65153700  | -1.34256900 |
| H  | 0.84712300  | 4.07105100  | -2.82587700 |
| H  | 2.02295700  | 3.03748000  | -1.97995200 |
| H  | -3.27204900 | 2.78247700  | -0.15092300 |

## 23

E (M06-SMD/BS1) = -1044.945254 au

H (M06-SMD/BS1) = -1044.61157 au

G (M06-SMD/BS1) = -1044.680585 au

E (M06-SMD/BS2//M06-SMD/BS1) = -1045.324937 au

|   |            |            |             |
|---|------------|------------|-------------|
| C | 2.02621900 | 2.54274100 | -0.52564600 |
| C | 1.32436500 | 1.39558000 | -0.18361600 |



|    |             |             |             |
|----|-------------|-------------|-------------|
| C  | 2.07268300  | 0.19755600  | -0.01581300 |
| C  | 3.48405400  | 0.17437400  | -0.12765700 |
| C  | 4.15832400  | 1.36881400  | -0.46756500 |
| C  | 3.42886300  | 2.51488500  | -0.66995800 |
| H  | 1.49311800  | 3.47368900  | -0.67686100 |
| C  | 4.14075300  | -1.05325100 | 0.11506500  |
| H  | 5.24290200  | 1.35699500  | -0.56420300 |
| H  | 3.93748600  | 3.43875500  | -0.94153600 |
| C  | 3.41535000  | -2.16998100 | 0.44944900  |
| C  | 2.01566700  | -2.08191800 | 0.51458000  |
| H  | 5.22688500  | -1.09424500 | 0.03832000  |
| H  | 3.89631000  | -3.12278900 | 0.65373000  |
| H  | 1.39365600  | -2.94084500 | 0.76046100  |
| N  | 1.37817400  | -0.94749600 | 0.27812100  |
| N  | -0.05575600 | 1.26032000  | 0.01720200  |
| C  | -0.84036000 | 2.30773400  | 0.36224800  |
| C  | -2.28041300 | 1.97640800  | 0.69584700  |
| H  | -2.79903900 | 2.93867100  | 0.77714400  |
| C  | -3.04392900 | 1.09354100  | -0.27626700 |
| O  | -0.45947300 | 3.48325100  | 0.45802600  |
| Pd | -0.62188000 | -0.70073300 | 0.18515200  |
| O  | -0.98331800 | -2.67400000 | 0.37487800  |
| C  | -0.76667800 | -3.37314900 | -0.81110900 |
| H  | -1.39624100 | -3.02027700 | -1.65256700 |
| H  | -1.00873800 | -4.44033200 | -0.65921700 |
| H  | 0.28539500  | -3.33317600 | -1.15918400 |
| H  | -2.70422400 | 1.26231800  | -1.31343900 |
| O  | -2.73511300 | -0.29160000 | 0.04635600  |
| H  | -2.32384900 | 1.50987000  | 1.69357000  |
| C  | -4.53236800 | 1.34956600  | -0.16329800 |
| H  | -5.11804100 | 0.79743900  | -0.90560800 |
| H  | -4.72307900 | 2.41652300  | -0.32804000 |
| H  | -4.89102700 | 1.08646900  | 0.84201200  |
| C  | -3.42795100 | -1.23812400 | -0.77542000 |
| H  | -3.23201200 | -1.03593000 | -1.83900200 |
| H  | -4.50343800 | -1.19684600 | -0.57488800 |
| H  | -3.05072300 | -2.22220600 | -0.49408200 |

## 24

E (M06-SMD/BS1) = -1273.931733 au

H (M06-SMD/BS1) = -1273.529979 au

G (M06-SMD/BS1) = -1273.615439 au

E (M06-SMD/BS2//M06-SMD/BS1) = -1274.407126 au

|    |             |             |             |
|----|-------------|-------------|-------------|
| C  | 2.38548300  | -2.81994000 | -0.35694400 |
| C  | 1.56687100  | -1.71877400 | -0.16324600 |
| C  | 2.18437800  | -0.48401500 | 0.17309700  |
| C  | 3.59168200  | -0.35263700 | 0.24544300  |
| C  | 4.39185100  | -1.49859000 | 0.03389400  |
| C  | 3.78682800  | -2.69904100 | -0.24851600 |
| H  | 1.94730100  | -3.78051700 | -0.60308200 |
| C  | 4.11609400  | 0.93075900  | 0.51811000  |
| H  | 5.47491500  | -1.40700600 | 0.09898500  |
| H  | 4.39562900  | -3.58814600 | -0.40502800 |
| C  | 3.26890400  | 1.99646000  | 0.69516400  |
| C  | 1.88141300  | 1.78668500  | 0.63885200  |
| H  | 5.19649200  | 1.05901000  | 0.57617700  |
| H  | 3.64346500  | 2.99770000  | 0.88999400  |
| H  | 1.18222300  | 2.60660000  | 0.78784700  |
| N  | 1.36355800  | 0.59208400  | 0.40440500  |
| N  | 0.17174400  | -1.65851300 | -0.27109400 |
| C  | -0.53466200 | -2.46756300 | -1.09655100 |
| C  | -1.98735600 | -2.08370200 | -1.29232300 |
| H  | -2.42392400 | -2.84342900 | -1.95192400 |
| C  | -2.84452200 | -1.99468700 | -0.04358200 |
| O  | -0.06897200 | -3.44010000 | -1.70488000 |
| Pd | -0.59086200 | 0.06110100  | 0.47823500  |
| O  | -1.31224100 | 1.81975600  | 1.20759600  |
| C  | -0.93718700 | 2.13494700  | 2.51784600  |
| H  | -1.30564300 | 1.39207500  | 3.24838900  |
| H  | -1.36504100 | 3.11180200  | 2.79996100  |
| H  | 0.15837900  | 2.20734600  | 2.65315100  |
| H  | -2.57263000 | -2.79347200 | 0.66777100  |
| O  | -2.58196200 | -0.72637500 | 0.62286000  |
| H  | -2.04791800 | -1.11945200 | -1.82457000 |
| C  | -4.31230300 | -2.06340200 | -0.40648300 |
| H  | -4.96855900 | -1.93436500 | 0.46149100  |
| H  | -4.53659200 | -3.04204800 | -0.84793300 |
| H  | -4.55278100 | -1.28652300 | -1.14523100 |
| C  | -2.98721800 | -0.73596900 | 1.99773300  |
| H  | -2.30467200 | -1.36370400 | 2.58855300  |
| H  | -4.01092300 | -1.11560600 | 2.08778400  |
| H  | -2.95864000 | 0.29785200  | 2.34771600  |

|   |             |            |             |
|---|-------------|------------|-------------|
| O | -0.75107800 | 3.66320700 | -0.49518400 |
| C | -0.73358200 | 3.19262400 | -1.72867300 |
| O | -1.00614200 | 2.03169800 | -2.01341800 |
| C | -0.34358400 | 4.22348700 | -2.73874200 |
| H | -1.00335900 | 5.09571500 | -2.65782600 |
| H | -0.39506200 | 3.81073800 | -3.74956000 |
| H | 0.67766000  | 4.56914400 | -2.53426400 |
| H | -0.99317500 | 2.91533200 | 0.17336700  |

### TS<sub>24-25</sub>

E (M06-SMD/BS1) = -1273.931062 au

H (M06-SMD/BS1) = -1273.532867 au

G (M06-SMD/BS1) = -1273.616896 au

E (M06-SMD/BS2//M06-SMD/BS1) = -1274.407334 au

|    |             |             |             |
|----|-------------|-------------|-------------|
| C  | -2.24621400 | 2.94780000  | -0.25020300 |
| C  | -1.47918700 | 1.80279000  | -0.11060700 |
| C  | -2.14829300 | 0.58558400  | 0.18304200  |
| C  | -3.55887500 | 0.51518600  | 0.26776200  |
| C  | -4.30710300 | 1.70475800  | 0.11405500  |
| C  | -3.65056000 | 2.88664400  | -0.12817200 |
| H  | -1.76675500 | 3.89628100  | -0.46413300 |
| C  | -4.13856800 | -0.75401800 | 0.48880400  |
| H  | -5.39247800 | 1.66038000  | 0.18889000  |
| H  | -4.21936000 | 3.80811100  | -0.24163400 |
| C  | -3.33927700 | -1.86455200 | 0.60044300  |
| C  | -1.94428100 | -1.71661400 | 0.53392400  |
| H  | -5.22290400 | -0.83547900 | 0.55670300  |
| H  | -3.75704100 | -2.85637200 | 0.75027000  |
| H  | -1.28321400 | -2.57685100 | 0.62106500  |
| N  | -1.37425300 | -0.53563400 | 0.35363000  |
| N  | -0.08917600 | 1.67999000  | -0.24320500 |
| C  | 0.64306100  | 2.47558900  | -1.06135800 |
| C  | 2.06801500  | 2.02157200  | -1.30068500 |
| H  | 2.52793600  | 2.76873300  | -1.95862900 |
| C  | 2.94341300  | 1.87210200  | -0.07131800 |
| O  | 0.21469200  | 3.49034900  | -1.62453000 |
| Pd | 0.60206300  | -0.08732800 | 0.43554100  |
| O  | 1.29177100  | -1.89418900 | 1.13140100  |
| C  | 0.88297900  | -2.26438700 | 2.42591800  |
| H  | 1.24689200  | -1.54616200 | 3.17764000  |
| H  | 1.30014800  | -3.25353100 | 2.67309800  |

|   |             |             |             |
|---|-------------|-------------|-------------|
| H | -0.21458100 | -2.32765600 | 2.52743700  |
| H | 2.73239600  | 2.67845100  | 0.65167100  |
| O | 2.61874100  | 0.61485700  | 0.58956700  |
| H | 2.06783500  | 1.06322900  | -1.84687100 |
| C | 4.40566500  | 1.85647100  | -0.45990600 |
| H | 5.06571500  | 1.67394100  | 0.39566200  |
| H | 4.68228200  | 2.82610800  | -0.89136400 |
| H | 4.58578600  | 1.07708400  | -1.21295400 |
| C | 3.02932300  | 0.59711300  | 1.96347300  |
| H | 2.37354100  | 1.24572800  | 2.56168900  |
| H | 4.06697900  | 0.93774400  | 2.05038700  |
| H | 2.96450800  | -0.43764800 | 2.30617300  |
| O | 0.59361400  | -3.64365500 | -0.39413800 |
| C | 0.52494900  | -3.24161500 | -1.63434100 |
| O | 0.89724100  | -2.13013300 | -2.01944800 |
| C | -0.07743800 | -4.25019700 | -2.56678100 |
| H | 0.37131600  | -5.23757400 | -2.40796800 |
| H | 0.04854700  | -3.94359000 | -3.60904900 |
| H | -1.14997600 | -4.34129200 | -2.34756100 |
| H | 0.94743300  | -2.81624300 | 0.28451200  |

## 25

E (M06-SMD/BS1) = -1273.932506 au

H (M06-SMD/BS1) = -1273.530241 au

G (M06-SMD/BS1) = -1273.616406 au

E (M06-SMD/BS2//M06-SMD/BS1) = -1274.409261 au

|   |            |             |             |
|---|------------|-------------|-------------|
| C | 1.86874400 | -3.17606000 | -0.14311200 |
| C | 1.23980800 | -1.94695000 | -0.04580400 |
| C | 2.03878900 | -0.80746200 | 0.22287500  |
| C | 3.44650700 | -0.89229200 | 0.32412100  |
| C | 4.05475900 | -2.16407800 | 0.21510600  |
| C | 3.27010400 | -3.27034300 | -0.00229600 |
| H | 1.28690100 | -4.06975100 | -0.33784200 |
| C | 4.16059000 | 0.31199600  | 0.51417600  |
| H | 5.13710400 | -2.24244600 | 0.30411100  |
| H | 3.73128300 | -4.25336900 | -0.08132000 |
| C | 3.48765900 | 1.50726100  | 0.58015300  |
| C | 2.08518000 | 1.51432400  | 0.49982100  |
| H | 5.24654500 | 0.27602700  | 0.59389900  |
| H | 4.01173000 | 2.45099900  | 0.70407500  |
| H | 1.51870400 | 2.44449000  | 0.54060700  |

|    |             |             |             |
|----|-------------|-------------|-------------|
| N  | 1.39215000  | 0.39626600  | 0.35034600  |
| N  | -0.12626200 | -1.66575400 | -0.20736700 |
| C  | -0.92884100 | -2.37281200 | -1.04546200 |
| C  | -2.27296800 | -1.74448800 | -1.34479800 |
| H  | -2.79394800 | -2.42721300 | -2.02665900 |
| C  | -3.16938400 | -1.49780000 | -0.14822500 |
| O  | -0.60967400 | -3.44434900 | -1.57094000 |
| Pd | -0.61862900 | 0.16600900  | 0.42398600  |
| O  | -1.15372400 | 2.07887900  | 1.13231600  |
| C  | -0.70344000 | 2.45753800  | 2.42936500  |
| H  | -1.08775900 | 1.73422600  | 3.15692800  |
| H  | -1.09398700 | 3.45395400  | 2.67233800  |
| H  | 0.39422300  | 2.47563700  | 2.49270700  |
| H  | -3.11116000 | -2.34644200 | 0.55400000  |
| O  | -2.68988900 | -0.32244400 | 0.56857000  |
| H  | -2.13082700 | -0.79129100 | -1.88087700 |
| C  | -4.59508100 | -1.24720200 | -0.58659500 |
| H  | -5.24764100 | -0.98515600 | 0.25423100  |
| H  | -5.00211500 | -2.15112200 | -1.05578600 |
| H  | -4.62455100 | -0.43009900 | -1.32024200 |
| C  | -3.10713900 | -0.31409800 | 1.94156000  |
| H  | -2.53197400 | -1.05465800 | 2.51484100  |
| H  | -4.17715000 | -0.54104300 | 2.00825800  |
| H  | -2.93423600 | 0.69274100  | 2.32856700  |
| O  | -0.09276100 | 3.74124900  | -0.49078900 |
| C  | 0.00809000  | 3.20131100  | -1.64344500 |
| O  | -0.60484000 | 2.17217900  | -2.00734400 |
| C  | 0.98898600  | 3.84782700  | -2.59507000 |
| H  | 0.97836900  | 4.93924200  | -2.49529600 |
| H  | 0.78976200  | 3.56416300  | -3.63381800 |
| H  | 2.00117200  | 3.50491800  | -2.33393700 |
| H  | -0.79176400 | 2.76206600  | 0.44829400  |

**TS<sub>25-26</sub>**

E (M06-SMD/BS1) = -1273.92026 au  
H (M06-SMD/BS1) = -1273.518798 au  
G (M06-SMD/BS1) = -1273.602731 au  
E (M06-SMD/BS2//M06-SMD/BS1) = -1274.394729 au

|   |             |             |             |
|---|-------------|-------------|-------------|
| C | -3.08357300 | -2.13383700 | -0.03778200 |
| C | -2.00623400 | -1.26847900 | 0.03929400  |
| C | -2.26810200 | 0.12260000  | 0.07319300  |

|    |             |             |             |
|----|-------------|-------------|-------------|
| C  | -3.58509100 | 0.63616400  | 0.07691700  |
| C  | -4.66146900 | -0.27788800 | 0.00454300  |
| C  | -4.40017100 | -1.62568300 | -0.05831300 |
| H  | -2.91803300 | -3.20468200 | -0.07762400 |
| C  | -3.73581700 | 2.03936700  | 0.15748800  |
| H  | -5.68101000 | 0.10421400  | -0.00211200 |
| H  | -5.22529200 | -2.33315700 | -0.12204400 |
| C  | -2.62864900 | 2.84840400  | 0.23324400  |
| C  | -1.34678900 | 2.27227900  | 0.20726100  |
| H  | -4.73916000 | 2.46388600  | 0.16231200  |
| H  | -2.71729300 | 3.92906600  | 0.30361000  |
| H  | -0.44002800 | 2.87882000  | 0.24450900  |
| N  | -1.18315900 | 0.96187700  | 0.12389800  |
| N  | -0.64294900 | -1.59977600 | 0.10637200  |
| C  | -0.19432000 | -2.70019600 | 0.76749700  |
| C  | 1.28873200  | -2.72355600 | 1.07084600  |
| H  | 1.49295300  | -3.67784800 | 1.57144300  |
| C  | 2.21400400  | -2.61114800 | -0.12325500 |
| O  | -0.92247600 | -3.62715400 | 1.13791900  |
| Pd | 0.55348500  | -0.00077500 | -0.14769500 |
| O  | 1.38570300  | 1.71266600  | -1.71781900 |
| C  | 0.51294400  | 1.99714200  | -2.79146600 |
| H  | 0.40864900  | 1.08236300  | -3.38966600 |
| H  | 0.91589100  | 2.79015100  | -3.43855400 |
| H  | -0.48860400 | 2.30243700  | -2.44850500 |
| H  | 1.83246400  | -3.22773700 | -0.95402800 |
| O  | 2.22899300  | -1.23128100 | -0.59606900 |
| H  | 1.53568300  | -1.92000400 | 1.78458900  |
| C  | 3.62735700  | -3.00427400 | 0.24261100  |
| H  | 4.32387200  | -2.85463900 | -0.59069900 |
| H  | 3.65919000  | -4.06513200 | 0.51929600  |
| H  | 3.97341700  | -2.40986000 | 1.09922500  |
| C  | 2.54377400  | -1.15421100 | -1.99496200 |
| H  | 1.70910700  | -1.55598400 | -2.58781300 |
| H  | 3.45580700  | -1.72710100 | -2.19922700 |
| H  | 2.70820400  | -0.10148000 | -2.23212800 |
| O  | 1.69037000  | 3.46111300  | 0.28166600  |
| C  | 2.09729500  | 2.65871700  | 1.16438400  |
| O  | 2.04968000  | 1.39396500  | 1.07344900  |
| C  | 2.66534300  | 3.22520700  | 2.44455500  |
| H  | 2.90979300  | 4.28731900  | 2.33997300  |

|   |            |            |             |
|---|------------|------------|-------------|
| H | 3.55663000 | 2.66626600 | 2.75242300  |
| H | 1.91980200 | 3.11555900 | 3.24399600  |
| H | 1.43683600 | 2.48035400 | -1.08640200 |

## 26

E (M06-SMD/BS1) = -1158.278747 au  
H (M06-SMD/BS1) = -1157.933293 au  
G (M06-SMD/BS1) = -1158.008275 au  
E (M06-SMD/BS2//M06-SMD/BS1) = -1158.702582 au

|    |             |             |             |
|----|-------------|-------------|-------------|
| C  | -2.50051800 | -2.38732600 | -0.66932400 |
| C  | -1.62984800 | -1.39871000 | -0.24124100 |
| C  | -2.16791500 | -0.11220700 | 0.02599200  |
| C  | -3.55221400 | 0.15592300  | -0.08565200 |
| C  | -4.40883700 | -0.88174000 | -0.51922500 |
| C  | -3.87825500 | -2.11526800 | -0.80834100 |
| H  | -2.12453800 | -3.37851900 | -0.89501500 |
| C  | -3.99557600 | 1.45447200  | 0.25204200  |
| H  | -5.47471700 | -0.68214600 | -0.61753200 |
| H  | -4.53000600 | -2.91735900 | -1.15093800 |
| C  | -3.09632600 | 2.40190900  | 0.67604000  |
| C  | -1.73302200 | 2.07320000  | 0.74298300  |
| H  | -5.05736900 | 1.68649400  | 0.17572900  |
| H  | -3.41117100 | 3.40448600  | 0.95219100  |
| H  | -0.98843300 | 2.79835100  | 1.06537000  |
| N  | -1.29263000 | 0.86812400  | 0.42064100  |
| N  | -0.24883800 | -1.50570700 | -0.01931000 |
| C  | 0.35249400  | -2.66586900 | 0.34325100  |
| C  | 1.78318000  | -2.53358700 | 0.82427500  |
| H  | 2.12770900  | -3.54796700 | 1.05900900  |
| C  | 2.77028000  | -1.91659200 | -0.14662300 |
| O  | -0.19614800 | -3.77448000 | 0.33632300  |
| Pd | 0.62849800  | 0.28690100  | 0.24199200  |
| H  | 2.57299200  | -2.27513400 | -1.17099800 |
| O  | 2.58705400  | -0.46965500 | -0.16397400 |
| H  | 1.80887000  | -1.95649500 | 1.76292600  |
| C  | 4.19166700  | -2.22049500 | 0.27342300  |
| H  | 4.93152300  | -1.72441800 | -0.36508400 |
| H  | 4.37156200  | -3.30069000 | 0.21249100  |
| H  | 4.35425900  | -1.89942400 | 1.31144600  |
| C  | 3.08323800  | 0.11903500  | -1.37582200 |
| H  | 2.41943400  | -0.13119900 | -2.21508100 |

|   |            |             |             |
|---|------------|-------------|-------------|
| H | 4.09675000 | -0.24349600 | -1.58064800 |
| H | 3.11547700 | 1.20002800  | -1.22581000 |
| O | 0.84301100 | 2.79899800  | -1.45936700 |
| C | 1.33195400 | 3.02739800  | -0.34567900 |
| O | 1.41969000 | 2.15747200  | 0.61071600  |
| C | 1.86198200 | 4.38985200  | 0.01704700  |
| H | 1.90445800 | 5.03957500  | -0.86236500 |
| H | 2.85803700 | 4.30871300  | 0.46788800  |
| H | 1.20195300 | 4.84616000  | 0.76701300  |

### TS<sub>26-27</sub>

E (M06-SMD/BS1) = -1387.247459 au

H (M06-SMD/BS1) = -1386.834303 au

G (M06-SMD/BS1) = -1386.921115 au

E (M06-SMD/BS2//M06-SMD/BS1) = -1387.765388 au

|    |             |             |             |
|----|-------------|-------------|-------------|
| C  | -3.14947000 | -2.33195000 | 0.29395700  |
| C  | -2.20659200 | -1.31880500 | 0.20041600  |
| C  | -2.68106100 | 0.01415700  | 0.14797600  |
| C  | -4.06476200 | 0.31770000  | 0.14821100  |
| C  | -4.99175400 | -0.74516200 | 0.21884700  |
| C  | -4.52695200 | -2.03570700 | 0.29903400  |
| H  | -2.82865600 | -3.36492200 | 0.36409100  |
| C  | -4.43744900 | 1.67937000  | 0.10246700  |
| H  | -6.05704300 | -0.51993100 | 0.22294000  |
| H  | -5.23220600 | -2.86214800 | 0.37122900  |
| C  | -3.47224300 | 2.65444100  | 0.07394400  |
| C  | -2.11818600 | 2.28230700  | 0.08684800  |
| H  | -5.49585100 | 1.93763300  | 0.09925500  |
| H  | -3.72645100 | 3.71052600  | 0.04661800  |
| H  | -1.33223100 | 3.03168000  | 0.07755800  |
| N  | -1.74405300 | 1.01359700  | 0.11518600  |
| N  | -0.80837200 | -1.46241500 | 0.21513000  |
| C  | -0.21625100 | -2.60357100 | -0.24333600 |
| C  | 1.28224400  | -2.72764400 | -0.10240800 |
| H  | 1.48909700  | -3.80464600 | -0.05574200 |
| C  | 2.05939800  | -2.15415700 | -1.27798800 |
| O  | -0.84081400 | -3.53735700 | -0.76434800 |
| Pd | 0.15490800  | 0.32291500  | 0.30328300  |
| H  | 1.55822700  | -2.44137800 | -2.22107700 |
| O  | 2.03815100  | -0.72531200 | -1.17415500 |
| H  | 1.64993600  | -2.26759300 | 0.82243500  |



|   |            |             |             |
|---|------------|-------------|-------------|
| C | 3.49198100 | -2.64684400 | -1.27054900 |
| H | 4.08602400 | -2.17796300 | -2.06508800 |
| H | 3.52908700 | -3.73343800 | -1.41946700 |
| H | 3.96291500 | -2.41394600 | -0.30375200 |
| C | 2.17241300 | -0.07542900 | -2.42362600 |
| H | 1.24020400 | -0.14689300 | -3.00717900 |
| H | 2.99698600 | -0.50212500 | -3.01360400 |
| H | 2.39793700 | 0.97880400  | -2.23052000 |
| O | 0.42951800 | 2.65873200  | -1.78199300 |
| C | 1.11755900 | 2.88207000  | -0.78724600 |
| O | 1.07550300 | 2.17467800  | 0.31292400  |
| C | 2.12342200 | 3.99865400  | -0.74112400 |
| H | 1.98966700 | 4.67772800  | -1.58835400 |
| H | 3.13264200 | 3.56449200  | -0.78973800 |
| H | 2.05187000 | 4.55357400  | 0.20129000  |
| O | 3.41078200 | 1.19112900  | 1.17904200  |
| C | 3.04365000 | 0.06584000  | 1.75459500  |
| O | 1.87448800 | -0.32480800 | 1.77792600  |
| C | 4.15897000 | -0.67846000 | 2.39857200  |
| H | 5.05443100 | -0.64767200 | 1.76821500  |
| H | 3.86425100 | -1.71196000 | 2.60013300  |
| H | 4.40858100 | -0.18777600 | 3.34889400  |
| H | 2.59124000 | 1.65820900  | 0.84191000  |

## 27

E (M06-SMD/BS1) = -1387.254178 au

H (M06-SMD/BS1) = -1386.839304 au

G (M06-SMD/BS1) = -1386.927731 au

E (M06-SMD/BS2//M06-SMD/BS1) = -1387.773875 au

|   |            |             |             |
|---|------------|-------------|-------------|
| C | 2.74251100 | 2.58252800  | 0.80753300  |
| C | 1.97965000 | 1.47958500  | 0.45646900  |
| C | 2.67044600 | 0.32173400  | 0.02333700  |
| C | 4.07561600 | 0.30665300  | -0.15243500 |
| C | 4.81166700 | 1.46399200  | 0.18530200  |
| C | 4.14601000 | 2.56194000  | 0.67384200  |
| H | 2.25938900 | 3.47817800  | 1.18091700  |
| C | 4.66019800 | -0.88074800 | -0.64534400 |
| H | 5.89375400 | 1.45845900  | 0.06457900  |
| H | 4.70511000 | 3.45152600  | 0.95957400  |
| C | 3.87352400 | -1.97142800 | -0.92224200 |
| C | 2.49304300 | -1.90115900 | -0.67858100 |

|    |             |             |             |
|----|-------------|-------------|-------------|
| H  | 5.73840500  | -0.91529000 | -0.79782800 |
| H  | 4.29406800  | -2.89676100 | -1.30600500 |
| H  | 1.85082700  | -2.76266200 | -0.84226000 |
| N  | 1.92127900  | -0.79933400 | -0.22008300 |
| N  | 0.57513600  | 1.37132300  | 0.49396900  |
| C  | -0.17788900 | 2.47168800  | 0.19502700  |
| C  | -1.67696700 | 2.31153600  | 0.15732900  |
| H  | -2.08899500 | 3.32713400  | 0.22176200  |
| C  | -2.15975700 | 1.64478700  | -1.13363300 |
| O  | 0.30678600  | 3.58055600  | -0.07060900 |
| Pd | 0.03177100  | -0.62211100 | 0.46737200  |
| H  | -1.66912800 | 0.66127400  | -1.22568000 |
| C  | -4.43611000 | 2.39922900  | -0.94008500 |
| H  | -5.44626700 | 1.97465400  | -0.93263500 |
| H  | -4.36090000 | 3.09431000  | -1.79047600 |
| H  | -4.29486700 | 2.96695200  | -0.00682900 |
| O  | -3.54265400 | 1.31383900  | -1.05179500 |
| H  | -2.03283900 | 1.73850400  | 1.02007000  |
| C  | -1.82321500 | 2.46290500  | -2.36604300 |
| H  | -2.29916000 | 2.02724800  | -3.25430500 |
| H  | -0.73778200 | 2.46580200  | -2.53177400 |
| H  | -2.14491600 | 3.50915300  | -2.27105200 |
| O  | -0.17444200 | -2.68430700 | 0.50759200  |
| C  | -0.74448000 | -3.23690100 | -0.50306000 |
| O  | -1.38854900 | -2.60415000 | -1.36670100 |
| C  | -0.56754500 | -4.72241200 | -0.61855600 |
| H  | 0.32189400  | -4.91906600 | -1.23366100 |
| H  | -1.42993400 | -5.17407600 | -1.11893500 |
| H  | -0.40952300 | -5.18550800 | 0.36049700  |
| O  | -3.23074600 | -1.44502100 | 0.12683100  |
| C  | -2.93120600 | -0.76723300 | 1.19496800  |
| O  | -1.78258400 | -0.41417800 | 1.51380200  |
| C  | -4.09669600 | -0.38511100 | 2.03175500  |
| H  | -4.60042400 | 0.45797600  | 1.53705400  |
| H  | -3.77288000 | -0.07191900 | 3.02717500  |
| H  | -4.81406800 | -1.20960200 | 2.09655300  |
| H  | -2.43338900 | -1.68651900 | -0.43951700 |

**TS**<sub>27-28</sub>

E (M06-SMD/BS1) = -1387.240301 au

H (M06-SMD/BS1) = -1386.831576 au

G (M06-SMD/BS1) = -1386.920376 au

E (M06-SMD/BS2//M06-SMD/BS1) = -1387.758245 au

|    |             |             |             |
|----|-------------|-------------|-------------|
| C  | -2.67638400 | -2.42215800 | 0.78886900  |
| C  | -1.91592200 | -1.33641200 | 0.42948800  |
| C  | -2.55449700 | -0.17046500 | -0.04204000 |
| C  | -3.95861800 | -0.12288200 | -0.19963000 |
| C  | -4.71527300 | -1.25579800 | 0.18261800  |
| C  | -4.08375100 | -2.37053400 | 0.67942400  |
| H  | -2.18375200 | -3.32895800 | 1.13767800  |
| C  | -4.51412900 | 1.06639500  | -0.72460600 |
| H  | -5.79881700 | -1.22183800 | 0.07955400  |
| H  | -4.66767200 | -3.23898800 | 0.97731100  |
| C  | -3.69609400 | 2.12065000  | -1.05012500 |
| C  | -2.31266600 | 2.01751400  | -0.82280200 |
| H  | -5.59244200 | 1.13151200  | -0.86483900 |
| H  | -4.09466600 | 3.04411400  | -1.46081900 |
| H  | -1.63852000 | 2.84751700  | -1.02528600 |
| N  | -1.76932800 | 0.91647600  | -0.33405400 |
| N  | -0.48024800 | -1.34936100 | 0.41810800  |
| C  | 0.05440000  | -1.99781900 | -0.71913700 |
| C  | 1.54611300  | -2.17321200 | -0.75530900 |
| H  | 1.73957900  | -3.18098500 | -1.14865000 |
| C  | 2.20844700  | -1.10682900 | -1.65478600 |
| O  | -0.65478400 | -2.38473400 | -1.63686000 |
| Pd | 0.09525800  | 0.67081400  | 0.41770400  |
| H  | 1.65079400  | -0.16230300 | -1.54262500 |
| C  | 4.46674200  | -1.80015300 | -1.26050000 |
| H  | 5.35987300  | -1.43965600 | -0.73888800 |
| H  | 4.74116300  | -2.02787300 | -2.30188100 |
| H  | 4.13311900  | -2.73005400 | -0.77243600 |
| O  | 3.50185300  | -0.77440000 | -1.17243900 |
| H  | 1.97829500  | -2.11505600 | 0.24862700  |
| C  | 2.19634100  | -1.50648200 | -3.11582600 |
| H  | 2.69767800  | -0.74600800 | -3.72856500 |
| H  | 1.16022400  | -1.60239900 | -3.46461000 |
| H  | 2.68960000  | -2.47412100 | -3.28015300 |
| O  | 0.43512400  | 2.68198400  | 0.51222400  |
| C  | 1.39884400  | 3.11488600  | -0.24389700 |
| O  | 2.07454300  | 2.40373300  | -0.99382800 |
| C  | 1.62427000  | 4.59977600  | -0.13724900 |
| H  | 0.72350500  | 5.13442800  | -0.46438500 |

|   |            |             |             |
|---|------------|-------------|-------------|
| H | 2.47308400 | 4.90768300  | -0.75504800 |
| H | 1.80819900 | 4.88076000  | 0.90674500  |
| O | 1.00872100 | -1.52635900 | 2.41496400  |
| C | 1.88683700 | -0.59902600 | 2.33411400  |
| O | 1.82995200 | 0.36741600  | 1.52361200  |
| C | 3.08214200 | -0.70677300 | 3.21700800  |
| H | 3.49788500 | 0.28114100  | 3.43429900  |
| H | 3.84376100 | -1.28915300 | 2.67897700  |
| H | 2.83715200 | -1.23727600 | 4.14184500  |
| H | 0.22302800 | -1.50491400 | 1.52535500  |

## 28

E (M06-SMD/BS1) = -1387.254974 au

H (M06-SMD/BS1) = -1386.840332 au

G (M06-SMD/BS1) = -1386.930035 au

E (M06-SMD/BS2//M06-SMD/BS1) = -1387.771562 au

|   |             |             |             |
|---|-------------|-------------|-------------|
| C | 0.04651000  | 3.24063300  | 1.34467900  |
| C | -0.36841100 | 2.01278200  | 0.89123400  |
| C | -1.53779100 | 1.89578600  | 0.11632600  |
| C | -2.29050400 | 3.05169400  | -0.20131700 |
| C | -1.84071100 | 4.30607200  | 0.27142600  |
| C | -0.69697500 | 4.39625100  | 1.02728100  |
| H | 0.95013700  | 3.31437500  | 1.94937300  |
| C | -3.45954800 | 2.87907200  | -0.97691900 |
| H | -2.42037200 | 5.19448000  | 0.02516700  |
| H | -0.35514000 | 5.36200500  | 1.39197400  |
| C | -3.82364000 | 1.62299700  | -1.39340700 |
| C | -3.02419800 | 0.52271200  | -1.04032600 |
| H | -4.05756000 | 3.75220900  | -1.23443100 |
| H | -4.71533400 | 1.45631000  | -1.99108700 |
| H | -3.27505300 | -0.48746700 | -1.36045200 |
| N | -1.92740800 | 0.65495400  | -0.31398000 |
| N | 0.35079000  | 0.79061200  | 1.21526200  |
| H | 0.30461100  | 0.58276700  | 2.22096000  |
| C | 1.73489600  | 0.66390900  | 0.80481300  |
| C | 2.06699500  | 1.17939800  | -0.56196000 |
| H | 2.12466400  | 2.27934500  | -0.52465100 |
| H | 1.24270400  | 0.93675100  | -1.24933500 |
| C | 3.39088800  | 0.63586500  | -1.07130500 |
| H | 3.44393300  | -0.44649300 | -0.85460000 |
| C | 3.54037900  | 0.86151400  | -2.56099700 |

|    |             |             |             |
|----|-------------|-------------|-------------|
| H  | 2.78446300  | 0.29011400  | -3.11676900 |
| H  | 4.53036300  | 0.53726700  | -2.90685200 |
| H  | 3.42115300  | 1.92688200  | -2.80374300 |
| O  | 2.49988600  | 0.09873100  | 1.55182400  |
| Pd | -0.67048300 | -0.83185000 | 0.27325400  |
| O  | -1.70664200 | -2.27602300 | -0.71551300 |
| C  | -2.58684200 | -2.88967700 | 0.01685800  |
| O  | -2.80227200 | -2.63929800 | 1.20712000  |
| O  | 0.63456400  | -2.23765800 | 0.96506700  |
| C  | 1.55057500  | -2.57687400 | 0.10967700  |
| O  | 1.59380600  | -2.17958800 | -1.06119600 |
| C  | -3.36625900 | -3.93684200 | -0.73208500 |
| H  | -4.02869000 | -3.44386100 | -1.45599100 |
| H  | -3.97156000 | -4.53443100 | -0.04409700 |
| H  | -2.69190500 | -4.58910600 | -1.29870100 |
| C  | 2.62655400  | -3.46195800 | 0.67442000  |
| H  | 3.11031700  | -4.03691000 | -0.12154400 |
| H  | 2.23808300  | -4.13497300 | 1.44585300  |
| H  | 3.38385500  | -2.81603400 | 1.14257600  |
| O  | 4.41646300  | 1.30667900  | -0.34993800 |
| C  | 5.56118000  | 0.51268500  | -0.15258300 |
| H  | 5.33224900  | -0.36943100 | 0.46990200  |
| H  | 6.30403200  | 1.12837700  | 0.36682300  |
| H  | 5.99854500  | 0.16507800  | -1.10285600 |

### HOAc

E (M06-SMD/BS1) = -228.9646732 au

H (M06-SMD/BS1) = -228.897569 au

G (M06-SMD/BS1) = -228.930026 au

E (M06-SMD/BS2//M06-SMD/BS1) = -229.0665165 au

|   |             |             |             |
|---|-------------|-------------|-------------|
| O | 0.76847600  | -1.03775700 | 0.00002200  |
| C | 0.08985300  | 0.11776600  | 0.00001000  |
| O | 0.64331200  | 1.19948900  | 0.00000100  |
| C | -1.38381000 | -0.10686600 | -0.00001000 |
| H | -1.67121300 | -0.69052900 | 0.88301500  |
| H | -1.91115100 | 0.84997700  | 0.00013400  |
| H | -1.67107300 | -0.69032000 | -0.88322100 |
| H | 1.72287000  | -0.82837900 | -0.00010600 |

### MeOH

E (M06-SMD/BS1) = -115.6494595 au

H (M06-SMD/BS1) = -115.593808 au  
 G (M06-SMD/BS1) = -115.620851 au  
 E (M06-SMD/BS2//M06-SMD/BS1) = -115.7071077 au  
 O        -0.74575100   0.12375200   -0.00005100  
 H        -1.13116900   -0.76443900   -0.00017800  
 C        0.65877100   -0.01928100   0.00000700  
 H        1.09045600   0.98821200   0.00093000  
 H        1.02639900   -0.54973100   0.89237600  
 H        1.02769400   -0.54837100   -0.89275900

### PhICOOH

E (M06-SMD/BS1) = -431.3364793 au  
 H (M06-SMD/BS1) = -431.221983 au  
 G (M06-SMD/BS1) = -431.267989 au  
 E (M06-SMD/BS2//M06-SMD/BS1) = -717.8839585 au  
 C        2.65757500   -0.16515700   0.02901900  
 C        1.33759400   0.30898000   0.03787600  
 C        0.29526000   -0.62847400   0.04153700  
 C        0.57234500   -1.99196100   0.03685500  
 C        1.89024000   -2.43807900   0.04540100  
 C        2.93684100   -1.52317900   0.04142100  
 H        3.47243200   0.55518100   0.03060700  
 H        -0.24280800   -2.71236800   0.02392300  
 H        2.09171900   -3.50789100   0.05000200  
 H        3.96978100   -1.86464800   0.04567100  
 I        -1.78409700   -0.11719800   -0.05123700  
 C        1.12456600   1.77759200   0.09092200  
 O        2.12811000   2.45261200   -0.48150300  
 O        0.17563900   2.33444600   0.60538500  
 H        1.94949400   3.40641000   -0.36389700

### 13\_H

E (M06-SMD/BS1) = -1233.516136 au  
 H (M06-SMD/BS1) = -1233.166631 au  
 G (M06-SMD/BS1) = -1233.250029 au  
 E (M06-SMD/BS2//M06-SMD/BS1) = -1233.971357 au  
 C        2.80357300   -1.50207900   1.30039200  
 C        1.79865700   -0.78776500   0.69604200  
 C        2.02953000   0.52846700   0.25063700  
 C        3.30957900   1.11200200   0.40486000  
 C        4.32999500   0.35470900   1.02545500

|    |             |             |             |
|----|-------------|-------------|-------------|
| C  | 4.07807500  | -0.92117200 | 1.46844200  |
| H  | 2.61102200  | -2.51944700 | 1.63989200  |
| C  | 3.48800600  | 2.43214600  | -0.06792600 |
| H  | 5.31341800  | 0.80611200  | 1.14789400  |
| H  | 4.86337400  | -1.49888900 | 1.95036300  |
| C  | 2.43683400  | 3.09908300  | -0.64601100 |
| C  | 1.18977700  | 2.45955100  | -0.75060400 |
| H  | 4.46372000  | 2.90465600  | 0.03685100  |
| H  | 2.54146500  | 4.11426300  | -1.01830600 |
| H  | 0.32857000  | 2.96124400  | -1.18968500 |
| N  | 0.99603900  | 1.22426800  | -0.32110800 |
| N  | 0.47582600  | -1.34423200 | 0.48311200  |
| H  | -0.02753100 | -1.57109900 | 1.35681200  |
| C  | 0.32441600  | -2.44128000 | -0.44830300 |
| C  | 1.26293200  | -2.45898000 | -1.61517600 |
| H  | 2.25588000  | -2.75072500 | -1.23825300 |
| H  | 1.38025900  | -1.43092100 | -1.98969800 |
| C  | 0.80070200  | -3.40433600 | -2.70540000 |
| H  | 0.72434600  | -4.43308100 | -2.33396900 |
| H  | -0.18325400 | -3.11090100 | -3.09282900 |
| O  | -0.55966300 | -3.24475600 | -0.25152500 |
| Pd | -0.76696300 | 0.21410500  | -0.25295200 |
| O  | -1.84680100 | 1.78454700  | -0.96410100 |
| C  | -2.33369800 | 2.53865000  | -0.02457800 |
| O  | -2.17799100 | 2.33436900  | 1.18407200  |
| O  | -2.50484500 | -0.84342800 | -0.11661200 |
| C  | -2.72723900 | -1.40530100 | 1.03058600  |
| O  | -1.98573400 | -1.30577200 | 2.01829600  |
| C  | -3.09242300 | 3.73148600  | -0.54025000 |
| H  | -2.38248100 | 4.44454600  | -0.98025200 |
| H  | -3.63431700 | 4.22529100  | 0.27176800  |
| H  | -3.79158200 | 3.43607600  | -1.33074800 |
| C  | -3.96589000 | -2.25666700 | 1.06509000  |
| H  | -4.29132900 | -2.42352200 | 2.09650500  |
| H  | -3.72631200 | -3.22947900 | 0.61324000  |
| H  | -4.77642800 | -1.80849400 | 0.48063100  |
| H  | 1.51173400  | -3.39546000 | -3.53902000 |

**TS**<sub>13-14\_H</sub>

E (M06-SMD/BS1) = -1233.503916 au

H (M06-SMD/BS1) = -1233.160993 au

G (M06-SMD/BS1) = -1233.239564 au

E (M06-SMD/BS2//M06-SMD/BS1) = -1233.959952 au

|    |             |             |             |
|----|-------------|-------------|-------------|
| C  | 2.73440400  | -1.04181400 | 1.49887300  |
| C  | 1.72043400  | -0.52790500 | 0.72520900  |
| C  | 1.79416000  | 0.81452000  | 0.29191300  |
| C  | 2.92102000  | 1.61331300  | 0.59488800  |
| C  | 3.95369800  | 1.05049900  | 1.38120100  |
| C  | 3.85078600  | -0.24388500 | 1.83069600  |
| H  | 2.67633900  | -2.07554000 | 1.83824500  |
| C  | 2.93370900  | 2.93787000  | 0.10065200  |
| H  | 4.81849600  | 1.66451800  | 1.62810200  |
| H  | 4.64044900  | -0.67184900 | 2.44466000  |
| C  | 1.87345600  | 3.40538100  | -0.63618700 |
| C  | 0.77174200  | 2.56436500  | -0.86988700 |
| H  | 3.79040200  | 3.57524500  | 0.31616900  |
| H  | 1.85584700  | 4.41803900  | -1.02924200 |
| H  | -0.10215100 | 2.90984100  | -1.42017100 |
| N  | 0.73744700  | 1.32078400  | -0.42318700 |
| N  | 0.58422800  | -1.29422100 | 0.30365900  |
| H  | -0.26048200 | -1.74277200 | 1.13513800  |
| C  | 0.75954000  | -2.25219900 | -0.72912100 |
| C  | 2.05130900  | -2.24271000 | -1.49971800 |
| H  | 2.87234800  | -2.48104900 | -0.80749000 |
| H  | 2.24163200  | -1.20848900 | -1.82939600 |
| C  | 2.03862600  | -3.20248300 | -2.67143900 |
| H  | 1.88243300  | -4.23564500 | -2.33818100 |
| H  | 1.23995800  | -2.95482100 | -3.38184000 |
| O  | -0.14653600 | -3.03410800 | -0.97030200 |
| Pd | -0.85677900 | 0.07436600  | -0.33616700 |
| O  | -2.18720600 | 1.47394000  | -0.99902700 |
| C  | -2.65822700 | 2.24740600  | -0.06921500 |
| O  | -2.36450200 | 2.16038800  | 1.12848100  |
| O  | -2.44733800 | -1.17561500 | 0.11792500  |
| C  | -2.33284700 | -1.96868500 | 1.10043400  |
| O  | -1.24767500 | -2.19050800 | 1.72868700  |
| C  | -3.59423700 | 3.30934900  | -0.58107300 |
| H  | -3.01990500 | 4.04692200  | -1.15744000 |
| H  | -4.09465600 | 3.81758200  | 0.24857100  |
| H  | -4.34011800 | 2.87606800  | -1.25727300 |
| C  | -3.54689100 | -2.71380600 | 1.54637700  |
| H  | -3.43319100 | -3.76897500 | 1.26603600  |



|   |             |             |             |
|---|-------------|-------------|-------------|
| H | -4.45305400 | -2.31327500 | 1.08479300  |
| H | -3.62675000 | -2.67081700 | 2.63832300  |
| H | 2.99451600  | -3.15982100 | -3.20635800 |

### 15\_H

E (M06-SMD/BS1) = -1004.516779 au  
H (M06-SMD/BS1) = -1004.23754 au  
G (M06-SMD/BS1) = -1004.307616 au  
E (M06-SMD/BS2//M06-SMD/BS1) = -1004.884014 au

|    |             |             |             |
|----|-------------|-------------|-------------|
| C  | 3.26330000  | 0.85708800  | -0.25297600 |
| C  | 1.92986100  | 0.52626600  | -0.06019300 |
| C  | 1.60419700  | -0.85400100 | 0.03663900  |
| C  | 2.58740100  | -1.86671500 | -0.06254500 |
| C  | 3.93354100  | -1.48550700 | -0.26100900 |
| C  | 4.24501900  | -0.15107000 | -0.35087200 |
| H  | 3.55276600  | 1.89773900  | -0.33099000 |
| C  | 2.15859100  | -3.20921000 | 0.03993600  |
| H  | 4.69712600  | -2.25761100 | -0.34027500 |
| H  | 5.27917100  | 0.15336300  | -0.50382600 |
| C  | 0.83008900  | -3.49994300 | 0.23161700  |
| C  | -0.09459700 | -2.44827300 | 0.32416000  |
| H  | 2.89856500  | -4.00533400 | -0.03576600 |
| H  | 0.47545600  | -4.52357800 | 0.31393100  |
| H  | -1.15584700 | -2.63021000 | 0.48461300  |
| N  | 0.28609000  | -1.18512600 | 0.22887400  |
| N  | 0.82945500  | 1.38738000  | 0.04984900  |
| C  | 0.88821500  | 2.74458800  | -0.04231500 |
| C  | -0.42588300 | 3.48396300  | 0.09456300  |
| H  | -0.40892100 | 4.29330800  | -0.64691800 |
| H  | -0.40375900 | 3.97892100  | 1.07710300  |
| C  | -1.70309300 | 2.68019500  | -0.05224700 |
| H  | -1.79938100 | 2.19376000  | -1.03499300 |
| H  | -1.89286400 | 1.99626200  | 0.83163400  |
| O  | 1.93174500  | 3.38759600  | -0.20022600 |
| Pd | -0.90926000 | 0.42838800  | 0.30342300  |
| O  | -2.62656400 | -0.65411800 | 0.63007400  |
| C  | -3.27585200 | -0.96796000 | -0.44775700 |
| O  | -2.94082500 | -0.62480400 | -1.58823700 |
| C  | -4.47944400 | -1.83920300 | -0.20899400 |
| H  | -4.14057700 | -2.86706500 | -0.02001100 |
| H  | -5.13481300 | -1.84326600 | -1.08540600 |

|   |             |             |            |
|---|-------------|-------------|------------|
| H | -5.03680300 | -1.50988600 | 0.67496700 |
| H | -2.59588000 | 3.31128300  | 0.04646800 |

**TS**<sub>15-16\_H</sub>

E (M06-SMD/BS1) = -1004.490347 au

H (M06-SMD/BS1) = -1004.216366 au

G (M06-SMD/BS1) = -1004.282263 au

E (M06-SMD/BS2//M06-SMD/BS1) = -1004.858066 au

|    |             |             |             |
|----|-------------|-------------|-------------|
| C  | -3.08878300 | 1.48021600  | -0.12175400 |
| C  | -1.86950600 | 0.82413800  | -0.03575500 |
| C  | -1.88242400 | -0.60064400 | -0.01054000 |
| C  | -3.09293500 | -1.33164200 | -0.07556800 |
| C  | -4.31356000 | -0.62428500 | -0.16448200 |
| C  | -4.29291900 | 0.74896400  | -0.18577100 |
| H  | -3.11288300 | 2.56360300  | -0.14206500 |
| C  | -3.00719200 | -2.74232100 | -0.04451700 |
| H  | -5.24755000 | -1.18208400 | -0.21241300 |
| H  | -5.22812400 | 1.30290300  | -0.25246800 |
| C  | -1.78355900 | -3.35826000 | 0.04528900  |
| C  | -0.62410200 | -2.56699500 | 0.10420900  |
| H  | -3.92547500 | -3.32697700 | -0.09230600 |
| H  | -1.69025200 | -4.44059500 | 0.07130400  |
| H  | 0.36522000  | -3.01627900 | 0.17408900  |
| N  | -0.67538600 | -1.24660700 | 0.07756000  |
| N  | -0.59581700 | 1.39471500  | 0.02784700  |
| C  | -0.30558600 | 2.71790900  | -0.09739400 |
| C  | 1.17617300  | 3.00366900  | -0.09795000 |
| C  | 2.02791100  | 1.93067300  | 0.56315000  |
| H  | 1.81611600  | 1.83428900  | 1.63864900  |
| O  | -1.14111700 | 3.61866300  | -0.23624100 |
| Pd | 0.89751300  | 0.08358900  | 0.19763400  |
| O  | 2.38550400  | -1.39129500 | 0.27709600  |
| C  | 3.48090500  | -1.02031500 | -0.24328400 |
| O  | 3.67820200  | 0.16849400  | -0.63950500 |
| C  | 4.58749500  | -2.01169800 | -0.38760700 |
| H  | 5.44880400  | -1.67601800 | 0.20276500  |
| H  | 4.90671900  | -2.05155100 | -1.43566400 |
| H  | 4.27991500  | -3.00664900 | -0.05565100 |
| H  | 2.66240300  | 0.89888600  | -0.17101300 |
| H  | 1.46996300  | 3.12232800  | -1.15341600 |
| H  | 1.33273900  | 3.98650800  | 0.36979400  |

H 3.08301400 2.24644000 0.53040300

### 7\_H

E (M06-SMD/BS1) = -775.513721 au

H (M06-SMD/BS1) = -775.303612 au

G (M06-SMD/BS1) = -775.357804 au

E (M06-SMD/BS2//M06-SMD/BS1) = -775.7869354 au

|    |             |             |             |
|----|-------------|-------------|-------------|
| C  | -0.94661400 | 2.44939900  | -0.07484300 |
| C  | -0.45855600 | 1.15023500  | -0.01928400 |
| C  | -1.41178300 | 0.07889900  | 0.01361300  |
| C  | -2.80422800 | 0.35305100  | 0.00116200  |
| C  | -3.25436800 | 1.69170000  | -0.04960100 |
| C  | -2.33151800 | 2.70688000  | -0.08816000 |
| H  | -0.24756900 | 3.27632300  | -0.10541000 |
| C  | -3.69202900 | -0.74724600 | 0.03680100  |
| H  | -4.32520800 | 1.89087600  | -0.06073400 |
| H  | -2.66378500 | 3.74320500  | -0.13123500 |
| C  | -3.20151800 | -2.02683900 | 0.08084000  |
| C  | -1.80758200 | -2.21318800 | 0.08844500  |
| H  | -4.76501600 | -0.55590900 | 0.02785700  |
| H  | -3.86009100 | -2.89124300 | 0.10874800  |
| H  | -1.38197300 | -3.21599700 | 0.12228500  |
| N  | -0.94858500 | -1.21111700 | 0.05599300  |
| N  | 0.88660700  | 0.77520800  | 0.01744700  |
| C  | 1.96510800  | 1.61571500  | 0.08105300  |
| C  | 3.26464300  | 0.86177900  | 0.24259600  |
| H  | 4.06317700  | 1.42224500  | -0.26637200 |
| H  | 3.50091600  | 0.90783000  | 1.31807300  |
| C  | 3.15896200  | -0.58587300 | -0.21179300 |
| H  | 3.39037500  | -0.70015200 | -1.28230800 |
| O  | 1.90698600  | 2.84877400  | 0.06405900  |
| Pd | 1.23466800  | -1.18157500 | -0.03775200 |
| H  | 3.78929400  | -1.27062500 | 0.37414800  |

### 17\_H

E (M06-SMD/BS1) = -1321.266785 au

H (M06-SMD/BS1) = -1320.907204 au

G (M06-SMD/BS1) = -1320.992877 au

E (M06-SMD/BS2//M06-SMD/BS1) = -1608.1543903 au

|   |            |            |            |
|---|------------|------------|------------|
| C | 5.15669400 | 0.54958500 | 0.85407900 |
| C | 3.84258200 | 0.39528000 | 0.43041000 |

|    |             |             |              |
|----|-------------|-------------|--------------|
| C  | 3.43279200  | -0.90792100 | -0.01107700  |
| C  | 4.34683700  | -1.99404100 | -0.00353300  |
| C  | 5.67403900  | -1.78792200 | 0.43619500   |
| C  | 6.05420900  | -0.53620800 | 0.85302400   |
| H  | 5.49132400  | 1.52315700  | 1.19302500   |
| C  | 3.87637900  | -3.25284900 | -0.444440400 |
| H  | 6.36937200  | -2.62642600 | 0.43539300   |
| H  | 7.07431300  | -0.36401600 | 1.19403200   |
| C  | 2.57654400  | -3.39701900 | -0.85760800  |
| C  | 1.73541900  | -2.27017300 | -0.83552400  |
| H  | 4.56374900  | -4.09885900 | -0.44696600  |
| H  | 2.18763700  | -4.35299000 | -1.19900000  |
| H  | 0.69432800  | -2.34905100 | -1.15534700  |
| N  | 2.14010300  | -1.07901600 | -0.43596600  |
| N  | 2.85734100  | 1.38157900  | 0.40013300   |
| C  | 2.99453800  | 2.67509500  | 0.81425000   |
| C  | 1.68456400  | 3.43199500  | 0.76895900   |
| H  | 1.89928100  | 4.48794300  | 0.54367000   |
| H  | 1.30659900  | 3.41858300  | 1.80464200   |
| C  | 0.65556800  | 2.81131000  | -0.16991100  |
| H  | 0.72167000  | 3.22779500  | -1.18784600  |
| O  | 4.03740600  | 3.19008900  | 1.23604400   |
| Pd | 1.10162300  | 0.84340600  | -0.37034400  |
| C  | -5.85454400 | 0.51783900  | 0.53722800   |
| C  | -4.65605500 | -0.19415800 | 0.57565700   |
| C  | -3.58187400 | 0.29490700  | -0.14872300  |
| C  | -3.62611100 | 1.44859000  | -0.90521200  |
| C  | -4.83624700 | 2.14377900  | -0.92817500  |
| C  | -5.94070500 | 1.68314800  | -0.21363000  |
| H  | -6.70558000 | 0.14214500  | 1.10299800   |
| H  | -2.75949000 | 1.80336500  | -1.45816300  |
| H  | -4.90878300 | 3.05799100  | -1.51442800  |
| H  | -6.87462400 | 2.24044900  | -0.24337300  |
| I  | -1.83454600 | -0.91700900 | 0.05539500   |
| C  | -4.50064300 | -1.44499000 | 1.36647900   |
| O  | -5.41893200 | -1.92877500 | 2.01859000   |
| O  | -3.30962800 | -1.98139600 | 1.30683600   |
| O  | -0.82901600 | 0.42170800  | -1.21676400  |
| C  | -0.79802600 | 0.03119100  | -2.58826200  |
| H  | -0.37444900 | 0.87369800  | -3.15038600  |
| H  | -1.81758400 | -0.16771500 | -2.95036300  |

|   |             |             |             |
|---|-------------|-------------|-------------|
| H | -0.17138500 | -0.85900800 | -2.74723900 |
| H | -0.37661600 | 2.93215700  | 0.19108900  |

**TS**<sub>17-18\_H</sub>

E (M06-SMD/BS1) = -1321.249538 au

H (M06-SMD/BS1) = -1320.891296 au

G (M06-SMD/BS1) = -1320.974572 au

E (M06-SMD/BS2//M06-SMD/BS1) = -1608.127506 au

|    |             |             |             |
|----|-------------|-------------|-------------|
| C  | -4.56963600 | 1.18699600  | -1.02916700 |
| C  | -3.42735000 | 0.70180400  | -0.40548100 |
| C  | -3.38819600 | -0.68993500 | -0.06572700 |
| C  | -4.48806700 | -1.53457700 | -0.37070600 |
| C  | -5.63098900 | -0.99626900 | -1.00386500 |
| C  | -5.65585300 | 0.33910500  | -1.31991500 |
| H  | -4.62111600 | 2.23654300  | -1.29390800 |
| C  | -4.38664800 | -2.90069500 | -0.02252400 |
| H  | -6.47006300 | -1.65323100 | -1.22914400 |
| H  | -6.53056100 | 0.76700600  | -1.80767500 |
| C  | -3.25220000 | -3.37169200 | 0.58635000  |
| C  | -2.20921500 | -2.46890300 | 0.85750000  |
| H  | -5.22110300 | -3.56429400 | -0.24882900 |
| H  | -3.14262200 | -4.41705200 | 0.86338400  |
| H  | -1.29704800 | -2.81459600 | 1.34234200  |
| N  | -2.26831100 | -1.18510600 | 0.55246000  |
| N  | -2.28994600 | 1.43816500  | -0.07693500 |
| C  | -2.06274300 | 2.74921600  | -0.38384200 |
| C  | -0.65419500 | 3.17588500  | -0.03193400 |
| H  | -0.65035000 | 4.25373900  | 0.19122700  |
| H  | -0.05760900 | 3.05173300  | -0.95154300 |
| C  | -0.05669700 | 2.35401300  | 1.09048000  |
| H  | -0.44456600 | 2.63474400  | 2.08132500  |
| O  | -2.86698500 | 3.51559200  | -0.92416300 |
| Pd | -0.82388500 | 0.47131600  | 0.90102800  |
| C  | 5.66456200  | -0.16315100 | -0.31174300 |
| C  | 4.33814400  | -0.30268100 | -0.72053700 |
| C  | 3.33725800  | -0.04194000 | 0.20655100  |
| C  | 3.59272500  | 0.35720800  | 1.50410200  |
| C  | 4.92886200  | 0.49398600  | 1.88401700  |
| C  | 5.95957500  | 0.23577600  | 0.98444200  |
| H  | 6.45105700  | -0.37533100 | -1.03457000 |
| H  | 2.78225500  | 0.54419800  | 2.20198700  |

|   |             |             |             |
|---|-------------|-------------|-------------|
| H | 5.15632200  | 0.80644300  | 2.90176200  |
| H | 6.99593500  | 0.34578400  | 1.29702000  |
| I | 1.35170500  | -0.27010800 | -0.63077900 |
| C | 4.01152200  | -0.73175400 | -2.10828900 |
| O | 4.88511800  | -0.97940500 | -2.93614500 |
| O | 2.74139600  | -0.82697000 | -2.37532000 |
| O | 0.81834000  | -0.26025600 | 1.89690600  |
| C | 0.80094400  | -1.57170200 | 2.38459000  |
| H | 1.69522700  | -1.72461400 | 3.01309800  |
| H | 0.83817100  | -2.33137900 | 1.58291100  |
| H | -0.09197500 | -1.77142800 | 3.00085200  |
| H | 1.04041000  | 2.35966800  | 1.10906000  |

### 18\_H

E (M06-SMD/BS1) = -1321.261937 au

H (M06-SMD/BS1) = -1320.903361 au

G (M06-SMD/BS1) = -1320.990104 au

E (M06-SMD/BS2//M06-SMD/BS1) = -1608.13410033 au

|   |             |             |             |
|---|-------------|-------------|-------------|
| C | -3.68710500 | -1.86261400 | -1.01264700 |
| C | -2.85688900 | -0.80626200 | -0.66341100 |
| C | -3.11951900 | -0.12484000 | 0.56710900  |
| C | -4.21526700 | -0.50284300 | 1.38327200  |
| C | -5.04541600 | -1.57372900 | 0.98059300  |
| C | -4.77079500 | -2.23350600 | -0.19188500 |
| H | -3.50328500 | -2.40083400 | -1.93554800 |
| C | -4.41795700 | 0.21708800  | 2.58251400  |
| H | -5.88438700 | -1.86043300 | 1.61305700  |
| H | -5.39832500 | -3.06517600 | -0.50795100 |
| C | -3.56785400 | 1.23837100  | 2.92864800  |
| C | -2.49908300 | 1.54509000  | 2.06940800  |
| H | -5.25599500 | -0.05571800 | 3.22350000  |
| H | -3.70089600 | 1.80541200  | 3.84622700  |
| H | -1.79291600 | 2.34104400  | 2.31014500  |
| N | -2.28699000 | 0.89404400  | 0.94108400  |
| N | -1.76604900 | -0.33748700 | -1.40230700 |
| C | -1.39888900 | -0.75263900 | -2.65156800 |
| C | -0.05875700 | -0.19230500 | -3.07773100 |
| H | -0.09787200 | 0.01326200  | -4.15839400 |
| H | 0.67490200  | -1.00287300 | -2.94801500 |
| C | 0.36418900  | 1.03821000  | -2.31638900 |
| H | -0.10727900 | 1.96837000  | -2.67377700 |

|    |             |             |             |
|----|-------------|-------------|-------------|
| O  | -2.04868300 | -1.51108200 | -3.37304900 |
| Pd | -0.63015200 | 1.06663500  | -0.50719200 |
| C  | 5.33327100  | -0.18774700 | 0.47484500  |
| C  | 4.04657400  | -0.72067900 | 0.56608000  |
| C  | 2.98194600  | 0.10937000  | 0.23842400  |
| C  | 3.13449900  | 1.43065100  | -0.14176600 |
| C  | 4.43335600  | 1.93435000  | -0.22015200 |
| C  | 5.52838200  | 1.12827900  | 0.07818800  |
| H  | 6.17311800  | -0.83269500 | 0.72888600  |
| H  | 2.26956200  | 2.06474700  | -0.33068900 |
| H  | 4.58003400  | 2.97243100  | -0.51386100 |
| H  | 6.53680800  | 1.53176200  | 0.01107400  |
| I  | 1.03972200  | -0.82206500 | 0.36280900  |
| C  | 3.83916800  | -2.12923700 | 1.03302700  |
| O  | 4.80833800  | -2.84797800 | 1.29833700  |
| O  | 2.61269600  | -2.50240100 | 1.14104100  |
| O  | 0.31469300  | 2.58931300  | 0.41167100  |
| C  | -0.30904000 | 3.75176800  | -0.03949700 |
| H  | 0.01799900  | 4.05063000  | -1.05393500 |
| H  | -0.07330800 | 4.58585700  | 0.64512900  |
| H  | -1.41630700 | 3.66833300  | -0.05775800 |
| H  | 1.44590400  | 1.16074300  | -2.21394400 |

### TS<sub>18-19\_H</sub>

E (M06-SMD/BS1) = -1321.259296 au  
H (M06-SMD/BS1) = -1320.901324 au  
G (M06-SMD/BS1) = -1320.98611 au  
E (M06-SMD/BS2//M06-SMD/BS1) = -1608.130922 au

|   |             |             |             |
|---|-------------|-------------|-------------|
| C | -3.78078500 | -2.28120600 | -0.10208000 |
| C | -3.00259500 | -1.14131700 | -0.19669400 |
| C | -3.50270000 | 0.06860600  | 0.36072500  |
| C | -4.78420700 | 0.11736300  | 0.96296300  |
| C | -5.55707400 | -1.06532500 | 1.02631600  |
| C | -5.05267800 | -2.23213800 | 0.50686800  |
| H | -3.41022400 | -3.21987600 | -0.50079500 |
| C | -5.21269200 | 1.35909900  | 1.48308500  |
| H | -6.53689600 | -1.03113800 | 1.50033300  |
| H | -5.63697300 | -3.14887700 | 0.56365000  |
| C | -4.39505300 | 2.46038400  | 1.40244300  |
| C | -3.13441200 | 2.32753000  | 0.79787900  |
| H | -6.19582500 | 1.42529500  | 1.94822600  |

|    |             |             |             |
|----|-------------|-------------|-------------|
| H  | -4.69800800 | 3.42589800  | 1.79849800  |
| H  | -2.45424900 | 3.17642700  | 0.72901800  |
| N  | -2.71046400 | 1.18168500  | 0.29584400  |
| N  | -1.74807800 | -1.04283200 | -0.81357500 |
| C  | -1.43100700 | -1.73200000 | -1.94768700 |
| C  | -0.16051900 | -1.21695600 | -2.58697300 |
| H  | -0.26739600 | -1.30620800 | -3.67956400 |
| H  | 0.67766700  | -1.86585900 | -2.29801100 |
| C  | 0.09399800  | 0.21280600  | -2.23497000 |
| H  | -0.59218800 | 0.93470100  | -2.69739400 |
| O  | -2.09170600 | -2.65096400 | -2.43157400 |
| Pd | -0.68569200 | 0.62508600  | -0.30302500 |
| C  | 5.54419200  | 0.47722500  | 0.12497600  |
| C  | 4.37959100  | -0.21703900 | 0.46021500  |
| C  | 3.16788600  | 0.33839200  | 0.06307300  |
| C  | 3.07701000  | 1.53940500  | -0.62010300 |
| C  | 4.25762600  | 2.20873400  | -0.93837200 |
| C  | 5.48974700  | 1.67652300  | -0.57181300 |
| H  | 6.49615300  | 0.04754100  | 0.43254500  |
| H  | 2.11041400  | 1.96495000  | -0.87522400 |
| H  | 4.20225600  | 3.15477300  | -1.47419500 |
| H  | 6.40887500  | 2.20231300  | -0.82335800 |
| I  | 1.39416500  | -0.78233400 | 0.56264000  |
| C  | 4.47349400  | -1.49852500 | 1.24701400  |
| O  | 5.59189500  | -1.94612300 | 1.54229000  |
| O  | 3.36025200  | -2.03446100 | 1.56688600  |
| O  | 0.13277100  | 2.37372000  | 0.23801600  |
| C  | -0.10551300 | 3.35399000  | -0.72815900 |
| H  | 0.52681100  | 3.23492400  | -1.62999000 |
| H  | 0.12266600  | 4.34396800  | -0.29741800 |
| H  | -1.15856600 | 3.38672700  | -1.07112800 |
| H  | 1.13485100  | 0.54150500  | -2.25900300 |

### 19\_H

E (M06-SMD/BS1) = -1321.263357 au  
H (M06-SMD/BS1) = -1320.905492 au  
G (M06-SMD/BS1) = -1320.987716 au  
E (M06-SMD/BS2//M06-SMD/BS1) = -1608.131926 au

|   |             |             |             |
|---|-------------|-------------|-------------|
| C | -4.11675400 | -1.79550600 | 0.60382100  |
| C | -3.08358900 | -0.94895000 | 0.26270600  |
| C | -3.38291500 | 0.40447700  | -0.03859100 |



|    |             |             |             |
|----|-------------|-------------|-------------|
| C  | -4.71353100 | 0.88295200  | -0.03402900 |
| C  | -5.74948000 | -0.01444000 | 0.31889000  |
| C  | -5.44573100 | -1.31636500 | 0.63357400  |
| H  | -3.90615700 | -2.83350900 | 0.84596800  |
| C  | -4.91820500 | 2.23405700  | -0.39275500 |
| H  | -6.77596900 | 0.34783000  | 0.33912900  |
| H  | -6.24099300 | -2.00577500 | 0.91078000  |
| C  | -3.84949300 | 3.03273100  | -0.72439000 |
| C  | -2.55190300 | 2.49779100  | -0.68323700 |
| H  | -5.93314900 | 2.62970400  | -0.40399300 |
| H  | -3.98159000 | 4.07398500  | -1.00490500 |
| H  | -1.67553100 | 3.10545600  | -0.90191200 |
| N  | -2.34087400 | 1.23530300  | -0.35480200 |
| N  | -1.72946000 | -1.29531500 | 0.09330000  |
| C  | -1.41975200 | -2.28519600 | -0.81137100 |
| C  | -0.13010800 | -1.98598200 | -1.54350800 |
| H  | -0.18676000 | -2.43768700 | -2.54661000 |
| H  | 0.73397800  | -2.43569200 | -1.03524200 |
| C  | 0.01148500  | -0.50637400 | -1.69138200 |
| H  | -0.72543300 | -0.02505700 | -2.34255100 |
| O  | -2.13227600 | -3.25364500 | -1.04919300 |
| Pd | -0.53062400 | 0.37475700  | 0.15629500  |
| C  | 4.72230800  | 0.71395900  | -1.16153100 |
| C  | 3.73122900  | -0.11306800 | -0.62020000 |
| C  | 3.16963200  | 0.29282900  | 0.58804500  |
| C  | 3.55824400  | 1.45101200  | 1.25547800  |
| C  | 4.56815000  | 2.23369100  | 0.70447100  |
| C  | 5.14867100  | 1.86193900  | -0.50559400 |
| H  | 5.15978300  | 0.43328100  | -2.11908900 |
| H  | 3.07227700  | 1.74682600  | 2.18338000  |
| H  | 4.88928000  | 3.13712700  | 1.21977300  |
| H  | 5.93209000  | 2.47655200  | -0.94583600 |
| I  | 1.53938800  | -0.79765100 | 1.45157400  |
| C  | 3.33027300  | -1.35795800 | -1.39992200 |
| O  | 3.07233300  | -1.17160200 | -2.61333600 |
| O  | 3.30474500  | -2.44238000 | -0.77255300 |
| O  | 0.41839600  | 2.13658600  | 0.23895300  |
| C  | 0.98220800  | 2.56299900  | -0.96403300 |
| H  | 1.84066600  | 1.94262200  | -1.28649300 |
| H  | 1.36258600  | 3.58959100  | -0.82574200 |
| H  | 0.25482100  | 2.59507600  | -1.79967400 |

H 1.02355700 -0.10282900 -1.78908100

## 21\_H

E (M06-SMD/BS1) = -1436.931147 au

H (M06-SMD/BS1) = -1436.514214 au

G (M06-SMD/BS1) = -1436.61058 au

E (M06-SMD/BS2//M06-SMD/BS1) = -1723.850027 au

|    |             |             |             |
|----|-------------|-------------|-------------|
| C  | 4.30652500  | 0.30888100  | 1.76622800  |
| C  | 3.22681800  | 0.15192900  | 0.92282400  |
| C  | 3.43469200  | -0.44589000 | -0.34666500 |
| C  | 4.72396700  | -0.84498800 | -0.76900600 |
| C  | 5.80959700  | -0.66608600 | 0.12070000  |
| C  | 5.59321500  | -0.10726800 | 1.35649500  |
| H  | 4.16547700  | 0.75512700  | 2.74659700  |
| C  | 4.84121200  | -1.39954900 | -2.06299100 |
| H  | 6.80337500  | -0.98352200 | -0.19121100 |
| H  | 6.42612400  | 0.02454700  | 2.04463500  |
| C  | 3.72924800  | -1.53918700 | -2.85843900 |
| C  | 2.47575400  | -1.14314600 | -2.36453500 |
| H  | 5.82259900  | -1.71346500 | -2.41683300 |
| H  | 3.79174600  | -1.96294700 | -3.85687600 |
| H  | 1.56875400  | -1.27488800 | -2.95123400 |
| N  | 2.34476200  | -0.61481400 | -1.16040300 |
| N  | 1.90815800  | 0.58983400  | 1.14540400  |
| C  | 1.68963100  | 1.91312100  | 1.43222400  |
| C  | 0.37526600  | 2.39632800  | 0.85825900  |
| H  | 0.46329500  | 3.47316300  | 0.65246100  |
| H  | -0.44500600 | 2.26411200  | 1.57572800  |
| C  | 0.10843100  | 1.68378100  | -0.42504100 |
| H  | 0.80921400  | 1.87689900  | -1.24299000 |
| O  | 2.48243900  | 2.64128800  | 2.02045600  |
| Pd | 0.58854900  | -0.39814700 | -0.07835300 |
| C  | -4.78630100 | -0.38615000 | -0.97803700 |
| C  | -3.72808500 | -0.02464100 | -0.13585900 |
| C  | -3.07427300 | -1.05972600 | 0.53092200  |
| C  | -3.42663200 | -2.39721300 | 0.37183500  |
| C  | -4.50037900 | -2.71885600 | -0.45202000 |
| C  | -5.18309000 | -1.70855700 | -1.12335500 |
| H  | -5.29573700 | 0.40385700  | -1.52798800 |
| H  | -2.86740200 | -3.18120700 | 0.87890700  |
| H  | -4.79098600 | -3.76074600 | -0.57335000 |

|   |             |             |             |
|---|-------------|-------------|-------------|
| H | -6.01946900 | -1.95392400 | -1.77545300 |
| I | -1.37149700 | -0.70647400 | 1.78761600  |
| C | -3.33409600 | 1.44004500  | -0.07449600 |
| O | -3.29585600 | 2.02235300  | -1.19576500 |
| O | -3.07235900 | 1.94520500  | 1.03594400  |
| O | -0.49656400 | -1.50422700 | -1.34427100 |
| C | -1.05670500 | -0.81025200 | -2.41711300 |
| H | -1.85586700 | -0.10777100 | -2.11402300 |
| H | -1.51671200 | -1.54311000 | -3.10298000 |
| H | -0.31212900 | -0.23834400 | -3.00761800 |
| H | -0.92168900 | 1.50615200  | -0.73610600 |
| C | -1.13188500 | 3.56161400  | -2.84617700 |
| H | -1.06057000 | 2.48435000  | -3.07647800 |
| H | -0.21000200 | 4.04549200  | -3.19114000 |
| H | -1.97325000 | 3.97573500  | -3.42518900 |
| O | -1.26871200 | 3.80726700  | -1.46480700 |
| H | -2.08516500 | 3.32301400  | -1.19026200 |

#### TS<sub>21-22\_H</sub>

E (M06-SMD/BS1) = -1436.930447 au

H (M06-SMD/BS1) = -1436.514615 au

G (M06-SMD/BS1) = -1436.60802 au

E (M06-SMD/BS2//M06-SMD/BS1) = -1723.84781 au

|   |            |             |             |
|---|------------|-------------|-------------|
| C | 4.34754400 | 0.97243900  | 1.41540500  |
| C | 3.26394600 | 0.49108900  | 0.70843000  |
| C | 3.47751900 | -0.54408600 | -0.23941800 |
| C | 4.77260700 | -1.05362900 | -0.49287400 |
| C | 5.86020600 | -0.53322300 | 0.24746700  |
| C | 5.63895100 | 0.45079500  | 1.17952400  |
| H | 4.20541500 | 1.75516800  | 2.15420500  |
| C | 4.89457400 | -2.05910200 | -1.47783600 |
| H | 6.85807300 | -0.93040700 | 0.06802600  |
| H | 6.47267500 | 0.84747300  | 1.75610800  |
| C | 3.78149600 | -2.50969800 | -2.14554800 |
| C | 2.52395200 | -1.97313100 | -1.82504000 |
| H | 5.88022000 | -2.46850800 | -1.69672300 |
| H | 3.84679100 | -3.28204900 | -2.90712200 |
| H | 1.61676300 | -2.33180800 | -2.30747700 |
| N | 2.38685500 | -1.02628100 | -0.91335000 |
| N | 1.93896000 | 0.95361800  | 0.76377800  |
| C | 1.68153400 | 2.29168000  | 0.69496800  |

|    |             |             |             |
|----|-------------|-------------|-------------|
| C  | 0.33069300  | 2.57875600  | 0.06202100  |
| H  | 0.40757700  | 3.56243900  | -0.42391000 |
| H  | -0.46070000 | 2.64211800  | 0.82021100  |
| C  | 0.02753400  | 1.55602300  | -0.96923800 |
| H  | 0.70751500  | 1.45687800  | -1.81700200 |
| O  | 2.45631700  | 3.18201400  | 1.03392700  |
| Pd | 0.62002200  | -0.43487000 | 0.00641400  |
| C  | -4.73720000 | -0.91985200 | -0.94645900 |
| C  | -3.71794000 | -0.25614700 | -0.25372700 |
| C  | -3.05219400 | -0.97893600 | 0.73489600  |
| C  | -3.35969600 | -2.30449400 | 1.02936200  |
| C  | -4.39702500 | -2.92610600 | 0.34170000  |
| C  | -5.08858400 | -2.22845400 | -0.64463600 |
| H  | -5.25255800 | -0.38208200 | -1.74122600 |
| H  | -2.79234400 | -2.84941100 | 1.78172300  |
| H  | -4.65211400 | -3.95860300 | 0.57322400  |
| H  | -5.89588400 | -2.71175500 | -1.19203100 |
| I  | -1.40064700 | -0.15169700 | 1.82378500  |
| C  | -3.36282000 | 1.15396800  | -0.68378000 |
| O  | -3.23637000 | 1.30344400  | -1.93390600 |
| O  | -3.21289500 | 2.02919600  | 0.19260800  |
| O  | -0.42288200 | -1.95189300 | -0.77004000 |
| C  | -0.97964800 | -1.67310700 | -2.01902500 |
| H  | -1.74526800 | -0.87568200 | -1.98872200 |
| H  | -1.47900100 | -2.58509500 | -2.39133900 |
| H  | -0.22620600 | -1.38053400 | -2.77888100 |
| H  | -0.97508700 | 1.15731800  | -1.09944800 |
| C  | -1.63740800 | 4.33120700  | -1.93460300 |
| H  | -2.33953600 | 4.86301400  | -2.59667400 |
| H  | -0.73820600 | 4.95114000  | -1.83223400 |
| H  | -2.11154000 | 4.22345800  | -0.94676600 |
| O  | -1.26548900 | 3.08309100  | -2.47899700 |
| H  | -2.05165900 | 2.48677700  | -2.38085800 |

## 22\_H

E (M06-SMD/BS1) = -1437.004094 au

H (M06-SMD/BS1) = -1436.583534 au

G (M06-SMD/BS1) = -1436.675969 au

E (M06-SMD/BS2//M06-SMD/BS1) = -1723.916481 au

|   |            |            |            |
|---|------------|------------|------------|
| C | 4.15968200 | 1.39150900 | 1.10265800 |
| C | 3.13091200 | 0.69886800 | 0.48559500 |

|    |             |             |             |
|----|-------------|-------------|-------------|
| C  | 3.47028300  | -0.48413600 | -0.22785500 |
| C  | 4.81531000  | -0.90275000 | -0.37758400 |
| C  | 5.83576800  | -0.14887800 | 0.24566400  |
| C  | 5.49778100  | 0.96092800  | 0.98066300  |
| H  | 3.93845400  | 2.28027500  | 1.68312100  |
| C  | 5.05626500  | -2.07350000 | -1.13176200 |
| H  | 6.87062900  | -0.47262600 | 0.14420200  |
| H  | 6.27487200  | 1.53559300  | 1.48232200  |
| C  | 4.00661100  | -2.77194500 | -1.67526500 |
| C  | 2.69583300  | -2.31904800 | -1.45057600 |
| H  | 6.08324700  | -2.41211500 | -1.26612000 |
| H  | 4.16321500  | -3.67658900 | -2.25677000 |
| H  | 1.83140400  | -2.87161800 | -1.81525200 |
| N  | 2.44645700  | -1.21993400 | -0.76189800 |
| N  | 1.76589700  | 1.04069000  | 0.46709900  |
| C  | 1.41313300  | 2.34776000  | 0.35845100  |
| C  | -0.02707700 | 2.65334000  | 0.01947300  |
| H  | -0.44699800 | 3.27848900  | 0.82221800  |
| C  | -0.06778500 | 3.39710900  | -1.31094300 |
| O  | 2.20175700  | 3.30264800  | 0.45349300  |
| Pd | 0.62670400  | -0.64459500 | 0.01876400  |
| C  | -4.49093500 | -0.88070500 | -1.31409100 |
| C  | -3.55900900 | -0.30865600 | -0.44436400 |
| C  | -3.02463600 | -1.09587900 | 0.57616500  |
| C  | -3.41002700 | -2.42010300 | 0.74375400  |
| C  | -4.36179400 | -2.96496900 | -0.11488400 |
| C  | -4.89897400 | -2.19774400 | -1.14365500 |
| H  | -4.89639200 | -0.27556100 | -2.12401000 |
| H  | -2.96130700 | -3.02863000 | 1.52643400  |
| H  | -4.67053100 | -4.00013200 | 0.01843200  |
| H  | -5.63295300 | -2.62787000 | -1.82205600 |
| I  | -1.44061800 | -0.36805900 | 1.81859500  |
| C  | -3.15831000 | 1.11223400  | -0.64613700 |
| O  | -2.63284000 | 1.32277300  | -1.84376100 |
| O  | -3.29666900 | 1.97846800  | 0.19792700  |
| O  | -0.23013500 | -2.36616000 | -0.56292400 |
| C  | -0.80116300 | -2.19257700 | -1.82201700 |
| H  | -1.57023700 | -1.39465100 | -1.84919000 |
| H  | -1.30591200 | -3.12780000 | -2.12646500 |
| H  | -0.05548400 | -1.95824600 | -2.61027400 |
| H  | 0.36568900  | 2.76603500  | -2.10073200 |

|   |             |            |             |
|---|-------------|------------|-------------|
| C | -1.99660700 | 4.76410200 | -1.03535600 |
| H | -2.96810800 | 4.94765100 | -1.50546300 |
| H | -1.38139600 | 5.67350900 | -1.10696300 |
| H | -2.15635500 | 4.52033800 | 0.02432300  |
| O | -1.38528100 | 3.70304700 | -1.74670300 |
| H | -2.29875800 | 2.26907300 | -1.88070600 |
| H | -0.63066900 | 1.74517200 | -0.05899800 |
| H | 0.51925800  | 4.32694300 | -1.25498300 |

### 1\_OMe

E (M06-SMD/BS1) = -763.2571087 au

H (M06-SMD/BS1) = -762.988392 au

G (M06-SMD/BS1) = -763.048036 au

E (M06-SMD/BS2//M06-SMD/BS1) = -763.5502595 au

|   |             |             |             |
|---|-------------|-------------|-------------|
| C | -0.30673300 | 1.47821200  | -0.52285700 |
| C | -0.65443000 | 0.15420000  | -0.35083500 |
| C | -2.01728200 | -0.17292700 | -0.04448100 |
| C | -2.96775600 | 0.87053400  | 0.10983100  |
| C | -2.56760700 | 2.21856000  | -0.04280100 |
| C | -1.26363400 | 2.50235300  | -0.35675000 |
| H | 0.70225400  | 1.75829300  | -0.80629900 |
| C | -4.29675900 | 0.49454700  | 0.41345200  |
| H | -3.30648800 | 3.00924200  | 0.08325300  |
| H | -0.94529000 | 3.53446500  | -0.49294400 |
| C | -4.61548600 | -0.83293400 | 0.53908600  |
| C | -3.59637200 | -1.79019900 | 0.35590600  |
| H | -5.04965400 | 1.27261600  | 0.54031600  |
| H | -5.62773600 | -1.15607900 | 0.77072300  |
| H | -3.83239600 | -2.85247500 | 0.44478400  |
| N | -2.34668700 | -1.48497800 | 0.07778400  |
| N | 0.19429300  | -0.94827100 | -0.49126300 |
| H | -0.31609400 | -1.83304300 | -0.50903300 |
| C | 1.54884400  | -1.12359000 | -0.41485700 |
| C | 2.44214500  | 0.06154200  | -0.19528900 |
| H | 2.46152800  | 0.67854400  | -1.10658200 |
| H | 2.03724800  | 0.69790400  | 0.60523500  |
| C | 3.85336500  | -0.35921000 | 0.14866200  |
| H | 4.29363800  | -0.95940000 | -0.66685000 |
| H | 3.86445400  | -0.98912000 | 1.05680900  |
| O | 2.00271600  | -2.26385800 | -0.51533500 |
| O | 4.60590500  | 0.81373500  | 0.35590500  |

|   |            |             |             |
|---|------------|-------------|-------------|
| C | 5.94168000 | 0.51921400  | 0.68306000  |
| H | 6.46672500 | 1.46904000  | 0.83174700  |
| H | 6.00869500 | -0.07514500 | 1.61022000  |
| H | 6.44107100 | -0.04293100 | -0.12434700 |

### 13\_OMe

E (M06-SMD/BS1) = -1347.967023 au

H (M06-SMD/BS1) = -1347.581493 au

G (M06-SMD/BS1) = -1347.671382 au

E (M06-SMD/BS2//M06-SMD/BS1) = -1348.469215 au

|    |             |             |             |
|----|-------------|-------------|-------------|
| C  | 2.73830400  | 0.40750100  | 2.03487900  |
| C  | 1.62439600  | 0.49171600  | 1.23720500  |
| C  | 1.40252900  | 1.62875300  | 0.43627200  |
| C  | 2.33319400  | 2.69459300  | 0.45320600  |
| C  | 3.47226000  | 2.58722700  | 1.28470200  |
| C  | 3.66801000  | 1.46840500  | 2.05772500  |
| H  | 2.89758200  | -0.48083100 | 2.64560400  |
| C  | 2.06222500  | 3.81225200  | -0.36873500 |
| H  | 4.18647800  | 3.40924800  | 1.29864600  |
| H  | 4.54474300  | 1.39039200  | 2.69636700  |
| C  | 0.93008200  | 3.83085300  | -1.14487900 |
| C  | 0.05276800  | 2.73353600  | -1.10983800 |
| H  | 2.76074000  | 4.64798100  | -0.37420900 |
| H  | 0.69310700  | 4.67440100  | -1.78707600 |
| H  | -0.85408500 | 2.71118200  | -1.71247500 |
| N  | 0.28178100  | 1.67535000  | -0.35082500 |
| N  | 0.64011500  | -0.57299000 | 1.17735800  |
| H  | 0.12744500  | -0.71321200 | 2.06145400  |
| C  | 1.05739400  | -1.85642200 | 0.66933100  |
| C  | 2.01061000  | -1.84606200 | -0.48173300 |
| H  | 3.01416000  | -2.06712800 | -0.08561000 |
| H  | 2.05640600  | -0.85724500 | -0.95659300 |
| C  | 1.58576400  | -2.89486700 | -1.50850500 |
| H  | 1.66116300  | -3.90592800 | -1.07357500 |
| H  | 0.53648300  | -2.72449000 | -1.79024900 |
| O  | 0.57578000  | -2.85975800 | 1.14768400  |
| Pd | -0.92090000 | 0.05094300  | -0.12216500 |
| O  | -2.32394400 | 0.74065400  | -1.42148900 |
| C  | -3.31298000 | 1.35757000  | -0.84721800 |
| O  | -3.41461900 | 1.53149600  | 0.37141900  |
| O  | -2.08126900 | -1.59749800 | 0.17115900  |

|   |             |             |             |
|---|-------------|-------------|-------------|
| C | -2.34264500 | -1.87315000 | 1.41219200  |
| O | -1.96693200 | -1.19357200 | 2.37643200  |
| C | -4.34107800 | 1.87487700  | -1.81710900 |
| H | -3.88535200 | 2.63924500  | -2.45974800 |
| H | -5.19117200 | 2.31106900  | -1.28448800 |
| H | -4.68929900 | 1.06605600  | -2.47038600 |
| C | -3.12039500 | -3.14518900 | 1.60655500  |
| H | -3.61285200 | -3.14945000 | 2.58392200  |
| H | -2.41717700 | -3.98891600 | 1.56818000  |
| H | -3.85882200 | -3.29008500 | 0.81092200  |
| O | 2.33539500  | -2.81092800 | -2.69484200 |
| C | 3.66044000  | -3.27386800 | -2.55396200 |
| H | 3.68414400  | -4.28227700 | -2.10871100 |
| H | 4.27547400  | -2.60155100 | -1.93479100 |
| H | 4.09844500  | -3.31783900 | -3.55677200 |

**TS**<sub>13-14\_OMe</sub>

E (M06-SMD/BS1) = -1347.954692 au

H (M06-SMD/BS1) = -1347.574858 au

G (M06-SMD/BS1) = -1347.663598 au

E (M06-SMD/BS2//M06-SMD/BS1) = -1348.457651 au

|   |             |             |             |
|---|-------------|-------------|-------------|
| C | -2.09526400 | 0.75160900  | -2.19912500 |
| C | -1.15750200 | 0.59412400  | -1.20606800 |
| C | -0.66332700 | 1.73318500  | -0.53266700 |
| C | -1.15795000 | 3.02325100  | -0.83439000 |
| C | -2.12987500 | 3.15089000  | -1.85453400 |
| C | -2.57611400 | 2.03821000  | -2.52576200 |
| H | -2.47425500 | -0.12686000 | -2.72050000 |
| C | -0.63409300 | 4.11123800  | -0.09927200 |
| H | -2.50529300 | 4.14334200  | -2.09934400 |
| H | -3.31632800 | 2.13921300  | -3.31671700 |
| C | 0.32236900  | 3.89281600  | 0.86151600  |
| C | 0.78792300  | 2.58599500  | 1.08673100  |
| H | -0.99753200 | 5.11655900  | -0.30864500 |
| H | 0.74238300  | 4.70904800  | 1.44259000  |
| H | 1.56729700  | 2.37764500  | 1.81802900  |
| N | 0.31211400  | 1.55114600  | 0.41567900  |
| N | -0.66414000 | -0.68529000 | -0.78666900 |
| H | 0.02652100  | -1.41875900 | -1.54912800 |
| C | -1.51031100 | -1.50924600 | -0.00542500 |
| C | -2.75812700 | -0.90719800 | 0.57295600  |



|    |             |             |             |
|----|-------------|-------------|-------------|
| H  | -3.45828100 | -0.69726700 | -0.24971600 |
| H  | -2.52042300 | 0.06760000  | 1.02718600  |
| C  | -3.39426800 | -1.81920700 | 1.60939100  |
| H  | -3.71233300 | -2.76813900 | 1.14409600  |
| H  | -2.66456200 | -2.06007400 | 2.39338300  |
| O  | -1.19580600 | -2.67322500 | 0.19078000  |
| Pd | 1.06621000  | -0.32682700 | 0.32977600  |
| O  | 2.71431000  | 0.11230600  | 1.45013300  |
| C  | 3.69709800  | 0.62570700  | 0.77505100  |
| O  | 3.67472900  | 0.83431200  | -0.44311700 |
| O  | 1.89949800  | -2.17195200 | -0.10420500 |
| C  | 1.65268500  | -2.69364400 | -1.23401800 |
| O  | 0.78831000  | -2.25621000 | -2.05951200 |
| C  | 4.88820200  | 0.98843900  | 1.62081500  |
| H  | 4.63437900  | 1.85627700  | 2.24411700  |
| H  | 5.74700300  | 1.24155200  | 0.99200900  |
| H  | 5.14986600  | 0.16618700  | 2.29653600  |
| C  | 2.40336900  | -3.92809000 | -1.60886500 |
| H  | 1.76534000  | -4.79670000 | -1.39758800 |
| H  | 3.32659900  | -4.02162700 | -1.03069800 |
| H  | 2.62090500  | -3.92765300 | -2.68184900 |
| O  | -4.48463000 | -1.20569100 | 2.25990400  |
| C  | -5.64003200 | -1.11674400 | 1.45803500  |
| H  | -5.53165800 | -0.38680300 | 0.63989000  |
| H  | -6.46186300 | -0.78903500 | 2.10421600  |
| H  | -5.89922100 | -2.09576600 | 1.02126400  |

### 15\_OMe

E (M06-SMD/BS1) = -1118.968347 au

H (M06-SMD/BS1) = -1118.652874 au

G (M06-SMD/BS1) = -1118.727167 au

E (M06-SMD/BS2//M06-SMD/BS1) = -1119.381355 au

|   |            |             |             |
|---|------------|-------------|-------------|
| C | 3.03222400 | 1.94152700  | -0.26437400 |
| C | 1.94543800 | 1.10090400  | -0.07012200 |
| C | 2.20373400 | -0.29519300 | -0.00233900 |
| C | 3.50939300 | -0.82601500 | -0.13084700 |
| C | 4.58673000 | 0.06681500  | -0.32676400 |
| C | 4.33477900 | 1.41514200  | -0.38898000 |
| H | 2.88016500 | 3.01176800  | -0.32153300 |
| C | 3.65748900 | -2.22936800 | -0.05651300 |
| H | 5.59502600 | -0.33190200 | -0.42545100 |

|    |             |             |             |
|----|-------------|-------------|-------------|
| H  | 5.15702200  | 2.11273300  | -0.53982300 |
| C  | 2.56090600  | -3.03402300 | 0.13347200  |
| C  | 1.29307200  | -2.44457500 | 0.25529400  |
| H  | 4.65416600  | -2.65847800 | -0.15362400 |
| H  | 2.64883200  | -4.11528800 | 0.19235600  |
| H  | 0.39327500  | -3.03758900 | 0.40920300  |
| N  | 1.13522200  | -1.13334400 | 0.19089900  |
| N  | 0.59293500  | 1.44910600  | 0.06673700  |
| C  | 0.12516900  | 2.72561300  | 0.04829800  |
| C  | -1.36590400 | 2.91092700  | 0.25055900  |
| H  | -1.66735200 | 3.79193200  | -0.32961700 |
| H  | -1.52582400 | 3.16187500  | 1.31041300  |
| C  | -2.26108600 | 1.75656300  | -0.12568000 |
| H  | -2.11671500 | 1.42979400  | -1.16864000 |
| H  | -2.09754300 | 0.87118600  | 0.60088200  |
| O  | 0.83172100  | 3.73093400  | -0.08439100 |
| Pd | -0.60776800 | -0.14629100 | 0.32811700  |
| O  | -1.70525700 | -1.84624300 | 0.66590900  |
| C  | -2.40171100 | -2.24062200 | -0.35491300 |
| O  | -2.44873300 | -1.64378100 | -1.43740400 |
| C  | -3.15600600 | -3.52146500 | -0.12148200 |
| H  | -2.44219600 | -4.34635400 | 0.00287000  |
| H  | -3.81690300 | -3.74332400 | -0.96469400 |
| H  | -3.74300200 | -3.45795000 | 0.80254200  |
| O  | -3.58888100 | 2.09657500  | 0.10973000  |
| C  | -4.49103200 | 1.10384400  | -0.34213200 |
| H  | -4.32975600 | 0.15421100  | 0.19424200  |
| H  | -4.37725900 | 0.92930100  | -1.42319500 |
| H  | -5.50168200 | 1.46683500  | -0.13440300 |

**TS**<sub>15-16\_OMe</sub>

E (M06-SMD/BS1) = -1118.93653 au

H (M06-SMD/BS1) = -1118.62742 au

G (M06-SMD/BS1) = -1118.695884 au

E (M06-SMD/BS2//M06-SMD/BS1) = -1119.349105 au

|   |             |             |             |
|---|-------------|-------------|-------------|
| C | -2.96634700 | 2.04752200  | -0.19305100 |
| C | -1.95074600 | 1.10946700  | -0.07722400 |
| C | -2.32090100 | -0.26528600 | -0.00562900 |
| C | -3.67754800 | -0.66825500 | -0.05216800 |
| C | -4.68125400 | 0.31974200  | -0.17102000 |
| C | -4.31622700 | 1.64195800  | -0.23832300 |

|    |             |             |             |
|----|-------------|-------------|-------------|
| H  | -2.71596300 | 3.10060500  | -0.25029400 |
| C  | -3.95164800 | -2.05283800 | 0.02310400  |
| H  | -5.72554700 | 0.01323200  | -0.20687600 |
| H  | -5.08198500 | 2.41088100  | -0.32978600 |
| C  | -2.92382800 | -2.95545600 | 0.13844400  |
| C  | -1.60214900 | -2.48066300 | 0.17965100  |
| H  | -4.98824200 | -2.38685300 | -0.01178600 |
| H  | -3.10773500 | -4.02480100 | 0.19850600  |
| H  | -0.75857600 | -3.16337100 | 0.27049100  |
| N  | -1.31774600 | -1.19205600 | 0.11061000  |
| N  | -0.57505600 | 1.34883200  | -0.01990900 |
| C  | 0.01872900  | 2.56206900  | -0.12006700 |
| C  | 1.53016700  | 2.50754100  | -0.08707700 |
| C  | 2.08183700  | 1.28417100  | 0.61776200  |
| H  | 1.66732700  | 1.19949100  | 1.63198900  |
| O  | -0.56612600 | 3.64340300  | -0.26119100 |
| Pd | 0.55629400  | -0.30270700 | 0.16914600  |
| O  | 1.64425500  | -2.08878200 | 0.27086200  |
| C  | 2.75865500  | -1.97409600 | -0.32566500 |
| O  | 3.16572200  | -0.86786900 | -0.79204100 |
| C  | 3.62946000  | -3.17691500 | -0.47605400 |
| H  | 4.56486400  | -3.01093200 | 0.07233100  |
| H  | 3.88993500  | -3.31020400 | -1.53246100 |
| H  | 3.13823200  | -4.07717500 | -0.09797000 |
| H  | 2.30649100  | 0.07282300  | -0.27796000 |
| H  | 1.87000400  | 2.55057900  | -1.13364700 |
| H  | 1.89889300  | 3.42239300  | 0.40086500  |
| O  | 3.46937100  | 1.31452000  | 0.83037400  |
| C  | 4.28007400  | 1.80582100  | -0.22354000 |
| H  | 4.03948600  | 1.33907100  | -1.18839800 |
| H  | 5.31257400  | 1.55514200  | 0.03972200  |
| H  | 4.19495300  | 2.89734800  | -0.31923300 |

### 7\_OMe

E (M06-SMD/BS1) = -889.9783836 au  
H (M06-SMD/BS1) = -889.732716 au  
G (M06-SMD/BS1) = -889.793292 au  
E (M06-SMD/BS2//M06-SMD/BS1) = -890.2963307 au

|   |            |             |             |
|---|------------|-------------|-------------|
| C | 1.95750600 | 2.25209800  | 0.14518800  |
| C | 1.17420400 | 1.10892000  | 0.05417700  |
| C | 1.84261000 | -0.16217900 | -0.00942200 |

|    |             |             |             |
|----|-------------|-------------|-------------|
| C  | 3.26155000  | -0.22267100 | 0.00971000  |
| C  | 4.01670000  | 0.96891900  | 0.09899200  |
| C  | 3.36345800  | 2.17401300  | 0.16588800  |
| H  | 1.47192600  | 3.21991300  | 0.19783300  |
| C  | 3.86863400  | -1.49802800 | -0.06107200 |
| H  | 5.10411600  | 0.90643600  | 0.11519600  |
| H  | 3.93326400  | 3.09947000  | 0.23819100  |
| C  | 3.09324800  | -2.62534300 | -0.14441100 |
| C  | 1.69447900  | -2.47830100 | -0.15515000 |
| H  | 4.95666400  | -1.56250300 | -0.04766300 |
| H  | 3.53139800  | -3.61862900 | -0.20086100 |
| H  | 1.04802700  | -3.35375400 | -0.21901400 |
| N  | 1.09041200  | -1.30624400 | -0.09055600 |
| N  | -0.21765000 | 1.07530400  | 0.01194100  |
| C  | -1.05664400 | 2.13787900  | -0.11464900 |
| C  | -2.49366200 | 1.69914000  | -0.31214300 |
| H  | -3.18026500 | 2.45860700  | 0.09071400  |
| H  | -2.66238800 | 1.66812900  | -1.40140500 |
| C  | -2.75361100 | 0.31936100  | 0.25333300  |
| H  | -2.93358800 | 0.33012000  | 1.34588200  |
| O  | -0.73134200 | 3.33113300  | -0.13045500 |
| Pd | -1.06589200 | -0.75021800 | 0.04214700  |
| O  | -3.80936500 | -0.29781400 | -0.41252300 |
| C  | -4.37302000 | -1.38575200 | 0.30229100  |
| H  | -4.80110300 | -1.04279900 | 1.25686400  |
| H  | -5.16881400 | -1.80658500 | -0.31930100 |
| H  | -3.62459800 | -2.16666800 | 0.50252800  |

### 17\_OMe

E (M06-SMD/BS1) = -1435.731193 au

H (M06-SMD/BS1) = -1435.335654 au

G (M06-SMD/BS1) = -1435.425373 au

E (M06-SMD/BS2//M06-SMD/BS1) = -1722.663362 au

|   |            |             |             |
|---|------------|-------------|-------------|
| C | 5.22038500 | 0.42757700  | 0.80234800  |
| C | 3.90512000 | 0.26653500  | 0.38567100  |
| C | 3.48186900 | -1.05100600 | -0.00061600 |
| C | 4.39052900 | -2.14137700 | 0.05066600  |
| C | 5.71896100 | -1.92810000 | 0.48350300  |
| C | 6.10963900 | -0.66376600 | 0.84880300  |
| H | 5.56266800 | 1.41261600  | 1.09831600  |
| C | 3.91481700 | -3.41390300 | -0.34249500 |

|    |             |             |             |
|----|-------------|-------------|-------------|
| H  | 6.40728300  | -2.77172000 | 0.51756000  |
| H  | 7.13082000  | -0.48571900 | 1.18350800  |
| C  | 2.61642000  | -3.56648800 | -0.75656100 |
| C  | 1.78154500  | -2.43468800 | -0.77716800 |
| H  | 4.59799200  | -4.26272500 | -0.31026800 |
| H  | 2.22420700  | -4.53207500 | -1.06577600 |
| H  | 0.74246400  | -2.52047200 | -1.10268100 |
| N  | 2.18840400  | -1.23227600 | -0.41630400 |
| N  | 2.93436400  | 1.26350400  | 0.31733600  |
| C  | 3.08530200  | 2.56357700  | 0.68454600  |
| C  | 1.77296200  | 3.31844300  | 0.64272400  |
| H  | 1.96216400  | 4.38852700  | 0.46492300  |
| H  | 1.36481400  | 3.24090300  | 1.66333300  |
| C  | 0.79309600  | 2.72470200  | -0.36197700 |
| H  | 1.04233800  | 3.04851100  | -1.38504400 |
| O  | 4.13121800  | 3.10216700  | 1.07068100  |
| Pd | 1.14794800  | 0.72740600  | -0.41861300 |
| C  | -5.84063700 | 0.23560700  | 0.45519100  |
| C  | -4.62371500 | -0.44261900 | 0.52154200  |
| C  | -3.55031300 | 0.07023800  | -0.18686000 |
| C  | -3.61052100 | 1.21936300  | -0.94985100 |
| C  | -4.83864400 | 1.88095000  | -1.00015500 |
| C  | -5.94449300 | 1.39267200  | -0.30602100 |
| H  | -6.69144200 | -0.15918800 | 1.00811000  |
| H  | -2.74014300 | 1.60143400  | -1.47911700 |
| H  | -4.92407100 | 2.79087500  | -1.59133500 |
| H  | -6.89293200 | 1.92317600  | -0.35848700 |
| I  | -1.77605200 | -1.09677600 | 0.04851100  |
| C  | -4.44650800 | -1.67940000 | 1.33014200  |
| O  | -5.36309200 | -2.18170300 | 1.97087500  |
| O  | -3.23940500 | -2.18030500 | 1.30068900  |
| O  | -0.79625600 | 0.24694800  | -1.23325300 |
| C  | -0.76878600 | -0.14673800 | -2.60355000 |
| H  | -0.37590800 | 0.70660800  | -3.17194600 |
| H  | -1.78506700 | -0.37683100 | -2.95664400 |
| H  | -0.11769400 | -1.01876600 | -2.76638200 |
| O  | -0.54648300 | 3.10468400  | -0.18008200 |
| C  | -1.11375800 | 2.79813700  | 1.07675500  |
| H  | -2.20110800 | 2.89225600  | 0.97379500  |
| H  | -0.78249600 | 3.49280400  | 1.86307800  |
| H  | -0.86560000 | 1.76702100  | 1.38185100  |

**TS<sub>17-18\_0Me</sub>**

E (M06-SMD/BS1) = -1435.714267 au

H (M06-SMD/BS1) = -1435.320514 au

G (M06-SMD/BS1) = -1435.410488 au

E (M06-SMD/BS2//M06-SMD/BS1) = -1722.636815 au

|    |             |             |             |
|----|-------------|-------------|-------------|
| C  | 4.66348700  | 0.64270400  | 1.35816200  |
| C  | 3.50528800  | 0.39532500  | 0.63275600  |
| C  | 3.45650100  | -0.79039100 | -0.17249600 |
| C  | 4.56310900  | -1.68136600 | -0.20046200 |
| C  | 5.72117400  | -1.38840900 | 0.55448900  |
| C  | 5.75651700  | -0.24440300 | 1.31149300  |
| H  | 4.72234600  | 1.53557300  | 1.96996000  |
| C  | 4.45298600  | -2.84453400 | -0.99602600 |
| H  | 6.56368200  | -2.07809200 | 0.52041000  |
| H  | 6.64388900  | -0.00475900 | 1.89579000  |
| C  | 3.30506700  | -3.08432600 | -1.70582600 |
| C  | 2.25990400  | -2.14644000 | -1.62896500 |
| H  | 5.29183200  | -3.53979300 | -1.02919100 |
| H  | 3.18792700  | -3.97149100 | -2.32303500 |
| H  | 1.33770600  | -2.30900700 | -2.18657100 |
| N  | 2.32658300  | -1.04601700 | -0.90299900 |
| N  | 2.37022600  | 1.20405700  | 0.60486100  |
| C  | 2.11949000  | 2.24775200  | 1.43667200  |
| C  | 0.73564500  | 2.82178000  | 1.22225000  |
| H  | 0.73006600  | 3.89270700  | 1.47722100  |
| H  | 0.05336700  | 2.32618800  | 1.93348000  |
| C  | 0.23944800  | 2.59981200  | -0.18470500 |
| H  | 0.83662500  | 3.14094600  | -0.94295300 |
| O  | 2.87351900  | 2.69769700  | 2.30789800  |
| Pd | 0.86876600  | 0.69098000  | -0.66117300 |
| C  | -5.57586300 | -0.73528400 | 0.40139000  |
| C  | -4.22672400 | -0.90675000 | 0.71311800  |
| C  | -3.28336100 | -0.30282500 | -0.10883700 |
| C  | -3.62130300 | 0.46197400  | -1.20867800 |
| C  | -4.97798600 | 0.62092500  | -1.49446700 |
| C  | -5.95141800 | 0.02682000  | -0.69597000 |
| H  | -6.31637900 | -1.21361700 | 1.04088500  |
| H  | -2.85469700 | 0.91429700  | -1.83024500 |
| H  | -5.26728700 | 1.21907100  | -2.35698700 |
| H  | -7.00545100 | 0.15876300  | -0.93174300 |

|   |             |             |             |
|---|-------------|-------------|-------------|
| I | -1.24804900 | -0.64206000 | 0.55482600  |
| C | -3.81880500 | -1.72344800 | 1.89120000  |
| O | -4.64786100 | -2.27186700 | 2.61605900  |
| O | -2.53865300 | -1.81205300 | 2.08978100  |
| O | -0.81832700 | 0.27729500  | -1.78006800 |
| C | -0.76422800 | -0.75747200 | -2.72310900 |
| H | -1.63626400 | -0.66525600 | -3.39334300 |
| H | -0.81583300 | -1.76176600 | -2.26561200 |
| H | 0.14990100  | -0.70941800 | -3.33742000 |
| O | -1.09732600 | 2.89641600  | -0.29111100 |
| C | -1.49922100 | 3.36255500  | -1.56952100 |
| H | -0.98272000 | 4.30239100  | -1.81424200 |
| H | -2.57705300 | 3.54505700  | -1.52281300 |
| H | -1.28503100 | 2.61212400  | -2.34372100 |

### 19'\_OMe

E (M06-SMD/BS1) = -1435.751932 au

H (M06-SMD/BS1) = -1435.35699 au

G (M06-SMD/BS1) = -1435.448883 au

E (M06-SMD/BS2//M06-SMD/BS1) = -1722.665733 au

|   |             |             |             |
|---|-------------|-------------|-------------|
| C | 4.23294800  | -1.72592800 | -0.72848100 |
| C | 3.20739700  | -0.91680300 | -0.27136900 |
| C | 3.52807900  | 0.41995200  | 0.10111900  |
| C | 4.86093000  | 0.89507400  | 0.07436600  |
| C | 5.88208400  | 0.02996400  | -0.38359400 |
| C | 5.55835800  | -1.24264100 | -0.78398000 |
| H | 4.01846000  | -2.74168600 | -1.04038700 |
| C | 5.08891500  | 2.22366100  | 0.49909500  |
| H | 6.90736100  | 0.39489400  | -0.42101000 |
| H | 6.33661800  | -1.90893800 | -1.15248500 |
| C | 4.03808600  | 3.00784000  | 0.90792200  |
| C | 2.73701300  | 2.47926900  | 0.87302100  |
| H | 6.10682200  | 2.61220600  | 0.49178500  |
| H | 4.18586200  | 4.03247300  | 1.23838700  |
| H | 1.87020400  | 3.08205400  | 1.13900800  |
| N | 2.50071900  | 1.23731100  | 0.49012500  |
| N | 1.86093200  | -1.26626100 | -0.07153300 |
| C | 1.52061600  | -2.52030600 | 0.30597700  |
| C | 0.16796300  | -2.61841700 | 0.99448300  |
| H | 0.20196800  | -3.49651800 | 1.66470000  |
| H | -0.67070400 | -2.79313200 | 0.30621000  |

|    |             |             |             |
|----|-------------|-------------|-------------|
| C  | -0.11729800 | -1.48354800 | 1.87908200  |
| H  | 0.67824100  | -0.98082800 | 2.44710500  |
| O  | 2.21683100  | -3.53230900 | 0.19459100  |
| Pd | 0.67446300  | 0.43618000  | -0.06846100 |
| C  | -4.87165900 | 0.85680500  | 0.59534100  |
| C  | -3.86894600 | 0.00581700  | 0.11188100  |
| C  | -3.03014500 | 0.53375000  | -0.87193400 |
| C  | -3.18605000 | 1.82027400  | -1.38151000 |
| C  | -4.21063800 | 2.62629400  | -0.89518300 |
| C  | -5.05055000 | 2.14288000  | 0.10269100  |
| H  | -5.52456000 | 0.47075000  | 1.37646300  |
| H  | -2.50563600 | 2.19890300  | -2.14167800 |
| H  | -4.34062900 | 3.63068000  | -1.29452200 |
| H  | -5.84962600 | 2.76822300  | 0.49760200  |
| I  | -1.32133200 | -0.52805300 | -1.62840600 |
| C  | -3.81843600 | -1.41095300 | 0.68246400  |
| O  | -4.21949500 | -1.54002300 | 1.86307700  |
| O  | -3.41335300 | -2.32179600 | -0.07969400 |
| O  | -0.17721600 | 2.24703900  | -0.08942800 |
| C  | -0.87061400 | 2.48935800  | 1.09230000  |
| H  | -1.73724900 | 1.81244000  | 1.23450400  |
| H  | -1.27569000 | 3.51759700  | 1.06907500  |
| H  | -0.22938000 | 2.41748400  | 1.99571000  |
| O  | -1.31992500 | -1.20516500 | 2.14021400  |
| C  | -1.65589700 | -0.26121100 | 3.19376600  |
| H  | -1.97716500 | -0.86306500 | 4.04726500  |
| H  | -2.48717400 | 0.33391200  | 2.81326900  |
| H  | -0.78166200 | 0.34898800  | 3.43875800  |

## 22\_OMe

E (M06-SMD/BS1) = -1551.470885 au

H (M06-SMD/BS1) = -1551.015221 au

G (M06-SMD/BS1) = -1551.111948 au

E (M06-SMD/BS2//M06-SMD/BS1) = -1838.427742 au

|   |            |             |             |
|---|------------|-------------|-------------|
| C | 4.04386400 | -0.02665200 | 1.78016500  |
| C | 2.98074700 | -0.21452900 | 0.91244700  |
| C | 3.20242300 | -1.02789000 | -0.23678000 |
| C | 4.47915100 | -1.56368800 | -0.53247400 |
| C | 5.54215900 | -1.32643500 | 0.36956200  |
| C | 5.30998700 | -0.58611200 | 1.50223800  |
| H | 3.90627900 | 0.56299400  | 2.67908300  |



|    |             |             |             |
|----|-------------|-------------|-------------|
| C  | 4.61191200  | -2.32126900 | -1.71811700 |
| H  | 6.52324800  | -1.74748300 | 0.15448700  |
| H  | 6.11819600  | -0.41433700 | 2.21157900  |
| C  | 3.52424900  | -2.52854900 | -2.53040700 |
| C  | 2.27918500  | -1.99831300 | -2.15267500 |
| H  | 5.58625600  | -2.73889400 | -1.97049000 |
| H  | 3.59864000  | -3.10767300 | -3.44697700 |
| H  | 1.38074900  | -2.18193200 | -2.73993500 |
| N  | 2.13310300  | -1.27621200 | -1.05649100 |
| N  | 1.69483000  | 0.34753900  | 0.99362000  |
| C  | 1.55422900  | 1.63601900  | 1.40484600  |
| C  | 0.35155800  | 2.38958500  | 0.86828500  |
| H  | 0.28237100  | 3.34979300  | 1.39509800  |
| H  | -0.58564500 | 1.84555200  | 1.03261200  |
| C  | 0.50519300  | 2.63281500  | -0.62958100 |
| O  | 2.38465500  | 2.24105700  | 2.09791200  |
| Pd | 0.36473100  | -0.77677600 | -0.11570700 |
| C  | -4.78837400 | 0.06349100  | -1.15476100 |
| C  | -3.76579500 | 0.20112000  | -0.21258900 |
| C  | -3.33014300 | -0.93271900 | 0.47517400  |
| C  | -3.89776000 | -2.17908100 | 0.24273000  |
| C  | -4.93759200 | -2.29162200 | -0.67736200 |
| C  | -5.38093200 | -1.17314700 | -1.37586500 |
| H  | -5.11779500 | 0.94191600  | -1.70796900 |
| H  | -3.52501500 | -3.05949700 | 0.76258100  |
| H  | -5.38966900 | -3.26566200 | -0.85507100 |
| H  | -6.18429300 | -1.26499700 | -2.10393800 |
| I  | -1.62832900 | -0.85514600 | 1.77175700  |
| C  | -3.14043300 | 1.53385000  | -0.00036200 |
| O  | -2.69949400 | 2.06375000  | -1.13526400 |
| O  | -3.02157300 | 2.07214200  | 1.08336100  |
| O  | -0.73349900 | -1.94540700 | -1.32783000 |
| C  | -1.20755000 | -1.16952500 | -2.38330500 |
| H  | -1.83526500 | -0.31810200 | -2.05261600 |
| H  | -1.84095300 | -1.79131800 | -3.04272700 |
| H  | -0.39627700 | -0.75197300 | -3.01735900 |
| H  | 0.33181100  | 1.69627400  | -1.19601400 |
| C  | -0.47760100 | 3.81748700  | -2.41668200 |
| H  | -0.56563600 | 2.86445600  | -2.96304600 |
| H  | 0.42707200  | 4.34042700  | -2.75057000 |
| H  | -1.35344000 | 4.43932900  | -2.62663200 |

|   |             |            |             |
|---|-------------|------------|-------------|
| O | -0.45834300 | 3.59049200 | -1.01081600 |
| H | -2.14247000 | 2.85487300 | -0.91610700 |
| O | 1.79572000  | 3.02669100 | -1.01074000 |
| C | 2.24571300  | 4.25969200 | -0.46131300 |
| H | 2.44410400  | 4.17446600 | 0.61496000  |
| H | 1.52154400  | 5.06680000 | -0.63639600 |
| H | 3.17962200  | 4.50314800 | -0.97707600 |

### 31

E (M06-SMD/BS1) = -652.4065225 au

H (M06-SMD/BS1) = -652.105395 au

G (M06-SMD/BS1) = -652.164535 au

E (M06-SMD/BS2//M06-SMD/BS1) = -652.6584964 au

|   |             |             |             |
|---|-------------|-------------|-------------|
| C | 2.81888900  | -1.83750200 | -0.38782800 |
| C | 3.20255700  | -0.38581800 | -0.65346400 |
| H | 3.42034200  | -0.24180200 | -1.72340000 |
| C | 2.20373000  | 0.68821600  | -0.26775500 |
| C | -0.24922100 | 1.13484700  | 0.06616400  |
| C | -0.39882000 | 2.33253300  | -0.87117700 |
| H | 0.50590100  | 2.94999100  | -0.83372200 |
| H | -1.24945200 | 2.96186100  | -0.58186200 |
| H | -0.55004000 | 1.99751100  | -1.90596100 |
| C | -0.11291600 | 1.58794900  | 1.52260300  |
| H | -0.00360100 | 0.71681200  | 2.18395200  |
| H | -1.00172800 | 2.15026800  | 1.83653000  |
| H | 0.76369600  | 2.23341900  | 1.64549100  |
| C | -1.47241400 | 0.22129400  | -0.03196100 |
| C | -2.75808400 | 0.73656500  | 0.15166500  |
| H | -2.91039800 | 1.79669100  | 0.34554900  |
| C | -3.84217000 | -0.12665100 | 0.08866200  |
| H | -4.85297400 | 0.25348200  | 0.22724900  |
| C | -3.62043900 | -1.47947300 | -0.15331600 |
| H | -4.44214600 | -2.18959200 | -0.21083700 |
| C | -2.31108400 | -1.90255800 | -0.32004100 |
| H | -2.08811500 | -2.95347500 | -0.51076800 |
| N | 0.90830700  | 0.33084000  | -0.32971500 |
| O | 2.59477000  | 1.82279600  | 0.03659000  |
| N | -1.26006900 | -1.07782600 | -0.26002600 |
| H | 4.13073000  | -0.13718600 | -0.11925100 |
| H | 3.63692300  | -2.47172300 | -0.75856900 |
| C | 2.57304500  | -2.13756500 | 1.08239000  |

|   |            |             |             |
|---|------------|-------------|-------------|
| H | 2.37638800 | -3.20517500 | 1.24457200  |
| H | 3.44713500 | -1.86275500 | 1.69006100  |
| H | 1.70936200 | -1.58092000 | 1.47480300  |
| H | 0.67401200 | -0.63764000 | -0.53638200 |
| H | 1.93971200 | -2.12425800 | -0.98763300 |

### 32 (PIDA)

E (M06-SMD/BS1) = -699.5035232 au

H (M06-SMD/BS1) = -699.293435 au

G (M06-SMD/BS1) = -699.360821 au

E (M06-SMD/BS2//M06-SMD/BS1) = -986.1874142 au

|   |             |             |             |
|---|-------------|-------------|-------------|
| C | 0.16764200  | -1.51068800 | -0.00044200 |
| C | 0.79221000  | -2.10586000 | 1.08777800  |
| C | 0.94782400  | -3.48958700 | 1.07914200  |
| C | 0.47548900  | -4.24096000 | 0.00625800  |
| C | -0.15152600 | -3.61879000 | -1.07006300 |
| C | -0.30795700 | -2.23514000 | -1.08550300 |
| H | 1.15342300  | -1.50802600 | 1.92239100  |
| H | 1.43624800  | -3.97867600 | 1.92001100  |
| H | 0.59787500  | -5.32263700 | 0.00896300  |
| H | -0.51787900 | -4.20844400 | -1.90849600 |
| H | -0.79240200 | -1.73612400 | -1.92253900 |
| I | -0.06864200 | 0.60618800  | -0.00164800 |
| O | -2.21201000 | 0.06204700  | 0.08067000  |
| C | -2.91038100 | 1.16248100  | 0.10186700  |
| O | -2.38989400 | 2.27973800  | 0.08058900  |
| O | 2.13939700  | 0.54137700  | -0.09949700 |
| C | 2.58462500  | 1.76694400  | -0.10043900 |
| O | 1.83596900  | 2.74492100  | -0.05270900 |
| C | 4.07874300  | 1.87603500  | -0.16787800 |
| H | 4.44258200  | 1.39860000  | -1.08560300 |
| H | 4.38604900  | 2.92529800  | -0.15190000 |
| H | 4.52914300  | 1.34458500  | 0.67874000  |
| C | -4.39340200 | 0.94559400  | 0.15595800  |
| H | -4.65196700 | 0.39129100  | 1.06621100  |
| H | -4.92065400 | 1.90349400  | 0.14633600  |
| H | -4.71169800 | 0.33786200  | -0.69928300 |

### 34

E (M06-SMD/BS1) = -1237.119136 au

H (M06-SMD/BS1) = -1236.700449 au

G (M06-SMD/BS1) = -1236.78654 au

E (M06-SMD/BS2//M06-SMD/BS1) = -1237.580445 au

|    |             |             |             |
|----|-------------|-------------|-------------|
| C  | 3.33143100  | 0.26690700  | -1.98726600 |
| C  | 3.26053100  | -0.57865800 | -0.72266200 |
| H  | 4.26693400  | -0.74594000 | -0.31340100 |
| C  | 2.43239200  | -0.08861000 | 0.43563800  |
| C  | 0.74119300  | 1.73722100  | 1.08792000  |
| C  | 1.78691800  | 2.81790900  | 1.31184300  |
| H  | 2.71195100  | 2.36768800  | 1.69265000  |
| H  | 1.44244800  | 3.53811100  | 2.06372400  |
| H  | 2.01106700  | 3.36078700  | 0.38368200  |
| C  | 0.31496400  | 1.10711500  | 2.41387600  |
| H  | -0.32910300 | 0.23058400  | 2.26042700  |
| H  | -0.25488900 | 1.85881600  | 2.97642600  |
| H  | 1.18136100  | 0.81137900  | 3.01102200  |
| C  | -0.51261800 | 2.26338500  | 0.40850900  |
| C  | -0.97561800 | 3.56385800  | 0.54735200  |
| H  | -0.40971000 | 4.28656900  | 1.12957900  |
| C  | -2.16962800 | 3.92878800  | -0.06461400 |
| H  | -2.54260300 | 4.94566400  | 0.03676700  |
| C  | -2.87535400 | 2.99043900  | -0.80735300 |
| H  | -3.80903900 | 3.24002500  | -1.30385900 |
| C  | -2.36401300 | 1.70813200  | -0.91159200 |
| H  | -2.86395500 | 0.92756500  | -1.48195100 |
| N  | 1.29191500  | 0.72045800  | 0.10649500  |
| O  | 2.65262500  | -0.42315200 | 1.57945800  |
| N  | -1.21673700 | 1.36248200  | -0.31112100 |
| H  | 2.85202100  | -1.57601100 | -0.95291700 |
| H  | 2.32354300  | 0.43706200  | -2.40062300 |
| C  | 4.07079500  | 1.58018800  | -1.78762400 |
| H  | 4.12453900  | 2.15384900  | -2.72136000 |
| H  | 3.58938200  | 2.22210500  | -1.03437900 |
| H  | 5.09906100  | 1.39612700  | -1.44648400 |
| H  | 1.46341600  | 1.20275900  | -0.78293800 |
| H  | 3.85105000  | -0.33021100 | -2.74902800 |
| Pd | -0.37045100 | -0.49018600 | -0.42939400 |
| O  | -2.06963400 | -1.45579200 | -0.99731400 |
| C  | -2.98237100 | -1.58261200 | -0.07998500 |
| O  | -2.88493900 | -1.15895400 | 1.07510500  |
| O  | 0.61114300  | -2.27691900 | -0.55807200 |
| C  | 0.67939600  | -2.94691700 | 0.55157100  |

|   |             |             |             |
|---|-------------|-------------|-------------|
| O | 0.11402000  | -2.62248700 | 1.60148800  |
| C | -4.21790400 | -2.29460800 | -0.56510500 |
| H | -3.95258700 | -3.27357100 | -0.98195400 |
| H | -4.93515100 | -2.42463700 | 0.25066700  |
| H | -4.68503100 | -1.71311900 | -1.37028900 |
| C | 1.57148100  | -4.15703000 | 0.48340800  |
| H | 1.27121200  | -4.89818000 | 1.23112100  |
| H | 1.57521500  | -4.60702500 | -0.51481400 |
| H | 2.59808100  | -3.83702800 | 0.71362900  |

### TS<sub>34-35</sub>

E (M06-SMD/BS1) = -1237.113665 au

H (M06-SMD/BS1) = -1236.701033 au

G (M06-SMD/BS1) = -1236.78396 au

E (M06-SMD/BS2//M06-SMD/BS1) = -1237.575824 au

|   |             |             |             |
|---|-------------|-------------|-------------|
| C | 1.09034900  | 1.74597600  | -2.66317800 |
| C | 0.83119000  | 2.64688900  | -1.44819900 |
| H | 0.58428900  | 3.65646700  | -1.80805000 |
| C | -0.34943700 | 2.22188600  | -0.60297100 |
| C | -1.22883200 | 1.20590500  | 1.45286100  |
| C | -1.91849100 | 2.48459600  | 1.91878100  |
| H | -1.15348200 | 3.18530900  | 2.27905800  |
| H | -2.58907000 | 2.26769900  | 2.76036100  |
| H | -2.49288500 | 2.97161100  | 1.12667200  |
| C | -0.68116500 | 0.50144200  | 2.70051100  |
| H | -0.12555900 | -0.41442100 | 2.45562700  |
| H | -1.51051000 | 0.23101300  | 3.36755700  |
| H | -0.01054200 | 1.18144100  | 3.24374600  |
| C | -2.14749500 | 0.24356800  | 0.72875900  |
| C | -3.52378700 | 0.17344800  | 0.89250000  |
| H | -4.02529900 | 0.87306600  | 1.55740800  |
| C | -4.24377400 | -0.79068800 | 0.19702000  |
| H | -5.32356200 | -0.85359300 | 0.31579700  |
| C | -3.57880200 | -1.66945200 | -0.65175900 |
| H | -4.10989900 | -2.43320400 | -1.21319300 |
| C | -2.20424300 | -1.55981900 | -0.77325200 |
| H | -1.61927500 | -2.21704700 | -1.41420000 |
| N | -0.07516900 | 1.48736700  | 0.54973300  |
| O | -1.48888700 | 2.54002400  | -0.94302700 |
| N | -1.52043000 | -0.62965100 | -0.09233000 |
| H | 1.74422400  | 2.72575300  | -0.84443300 |

|    |             |             |             |
|----|-------------|-------------|-------------|
| H  | 1.49020900  | 0.77654200  | -2.32443900 |
| C  | -0.12475000 | 1.51039300  | -3.54382100 |
| H  | 0.15775300  | 0.96876800  | -4.45602800 |
| H  | -0.89019300 | 0.91087500  | -3.03022100 |
| H  | -0.59352800 | 2.45751100  | -3.84693600 |
| H  | 1.27545300  | 1.62048500  | 1.14456400  |
| H  | 1.88998100  | 2.21809300  | -3.25227100 |
| Pd | 0.49077200  | -0.38630000 | -0.14531800 |
| O  | 0.87953900  | -2.26474400 | -0.89520000 |
| C  | 0.88060000  | -3.20749100 | -0.00738100 |
| O  | 0.70439200  | -3.02790400 | 1.20516200  |
| O  | 2.55531800  | -0.12622300 | 0.08805300  |
| C  | 3.01965100  | 0.71997400  | 0.88863700  |
| O  | 2.30996200  | 1.62105500  | 1.48073800  |
| C  | 1.09022200  | -4.58575100 | -0.57609000 |
| H  | 1.94439200  | -4.59468600 | -1.26307600 |
| H  | 1.24774900  | -5.31726700 | 0.22211900  |
| H  | 0.20249800  | -4.87401200 | -1.15476000 |
| C  | 4.47423200  | 0.73141600  | 1.19910500  |
| H  | 4.61407600  | 0.65002400  | 2.28367400  |
| H  | 4.99013600  | -0.08791100 | 0.69325300  |
| H  | 4.90131100  | 1.69184600  | 0.88561100  |

### 35

E (M06-SMD/BS1) = -1237.113876 au  
H (M06-SMD/BS1) = -1236.698038 au  
G (M06-SMD/BS1) = -1236.781972 au  
E (M06-SMD/BS2//M06-SMD/BS1) = -1237.576255 au

|   |             |             |             |
|---|-------------|-------------|-------------|
| C | 0.96679100  | -1.75125000 | 2.68148500  |
| C | 0.73422400  | -2.64623400 | 1.45704300  |
| H | 0.48454600  | -3.65859500 | 1.80744300  |
| C | -0.43032300 | -2.22302800 | 0.58612600  |
| C | -1.26759600 | -1.17185800 | -1.46258900 |
| C | -1.99829400 | -2.42235200 | -1.94326000 |
| H | -1.25459800 | -3.15087800 | -2.29308300 |
| H | -2.64593600 | -2.17783500 | -2.79535500 |
| H | -2.60310900 | -2.89011800 | -1.16265800 |
| C | -0.68697200 | -0.48192500 | -2.70404800 |
| H | -0.10459200 | 0.41505700  | -2.45164400 |
| H | -1.49926700 | -0.18387500 | -3.38047600 |
| H | -0.03152600 | -1.18240200 | -3.24021400 |

|    |             |             |             |
|----|-------------|-------------|-------------|
| C  | -2.15732900 | -0.18063200 | -0.74318800 |
| C  | -3.53033800 | -0.06185700 | -0.90668700 |
| H  | -4.05542200 | -0.74106400 | -1.57457600 |
| C  | -4.21628000 | 0.92371000  | -0.20666900 |
| H  | -5.29337900 | 1.02448900  | -0.32421100 |
| C  | -3.52084600 | 1.77550600  | 0.64528300  |
| H  | -4.02502900 | 2.55471400  | 1.21027600  |
| C  | -2.15083600 | 1.61808500  | 0.76566600  |
| H  | -1.54315700 | 2.25212500  | 1.40886300  |
| N  | -0.13106900 | -1.49116700 | -0.55346100 |
| O  | -1.57484400 | -2.55532400 | 0.90511200  |
| N  | -1.50028600 | 0.66702100  | 0.08084400  |
| H  | 1.65937600  | -2.71884900 | 0.87088900  |
| H  | 1.39052200  | -0.78628400 | 2.35814600  |
| C  | -0.27288100 | -1.49998100 | 3.52284600  |
| H  | -0.01308000 | -0.96515200 | 4.44577900  |
| H  | -1.01164700 | -0.88783200 | 2.98542900  |
| H  | -0.76582000 | -2.44077500 | 3.80668300  |
| H  | 1.37564700  | -1.65328000 | -1.19864100 |
| H  | 1.74105300  | -2.23376900 | 3.29575800  |
| Pd | 0.50123000  | 0.35743500  | 0.13906000  |
| O  | 0.94146700  | 2.22746000  | 0.89415800  |
| C  | 0.96445700  | 3.17332200  | 0.01069100  |
| O  | 0.78262100  | 3.00356500  | -1.20279800 |
| O  | 2.57238200  | 0.05087500  | -0.05034000 |
| C  | 3.06494600  | -0.77589500 | -0.84411500 |
| O  | 2.36887600  | -1.66638900 | -1.48612800 |
| C  | 1.20827800  | 4.54423100  | 0.58398000  |
| H  | 2.06286000  | 4.52986500  | 1.27039800  |
| H  | 1.38309900  | 5.27473500  | -0.21157200 |
| H  | 0.32836000  | 4.85218500  | 1.16449300  |
| C  | 4.52563000  | -0.80385000 | -1.10956000 |
| H  | 4.70059800  | -0.71810000 | -2.18864100 |
| H  | 5.03274700  | 0.00646300  | -0.58129800 |
| H  | 4.93081600  | -1.77124100 | -0.78829400 |

### 36

E (M06-SMD/BS1) = -1008.110912 au  
 H (M06-SMD/BS1) = -1007.763247 au  
 G (M06-SMD/BS1) = -1007.837463 au  
 E (M06-SMD/BS2//M06-SMD/BS1) = -1008.482903 au

|    |             |             |             |
|----|-------------|-------------|-------------|
| C  | 0.31830100  | -3.00671000 | 0.18484000  |
| C  | -0.99076000 | -3.04497400 | -0.58810000 |
| H  | -1.54106400 | -3.95047800 | -0.29857600 |
| C  | -1.94827600 | -1.87678400 | -0.43089700 |
| C  | -2.21338900 | 0.56141900  | -0.13124300 |
| C  | -3.05646500 | 0.47425600  | 1.14665300  |
| H  | -3.76188700 | -0.35995900 | 1.07584900  |
| H  | -3.62644900 | 1.39926500  | 1.30479500  |
| H  | -2.40584900 | 0.31446200  | 2.01892600  |
| C  | -3.08655300 | 0.79004700  | -1.36797100 |
| H  | -2.46007400 | 0.90440100  | -2.26293100 |
| H  | -3.69985200 | 1.69289900  | -1.25629800 |
| H  | -3.75722600 | -0.06116100 | -1.51359600 |
| C  | -1.26920500 | 1.73193600  | 0.02745100  |
| C  | -1.70997200 | 3.05233000  | 0.06398700  |
| H  | -2.77026700 | 3.26819600  | -0.04572200 |
| C  | -0.79804500 | 4.08031700  | 0.24399000  |
| H  | -1.14039000 | 5.11259400  | 0.27042700  |
| C  | 0.55341500  | 3.78191900  | 0.39258900  |
| H  | 1.29902200  | 4.55860600  | 0.53818700  |
| C  | 0.94278000  | 2.45797400  | 0.35575400  |
| H  | 1.97881700  | 2.15182600  | 0.48080100  |
| N  | -1.38815100 | -0.65805900 | -0.29435700 |
| O  | -3.17181400 | -2.08824300 | -0.50097200 |
| N  | 0.04726100  | 1.47037000  | 0.17725000  |
| H  | -0.78170300 | -3.14047600 | -1.66482400 |
| H  | 1.05383200  | -2.22804700 | -0.21080300 |
| C  | 0.16901100  | -3.03288400 | 1.69653800  |
| H  | 1.13676800  | -2.89864400 | 2.19641300  |
| H  | -0.51360200 | -2.25601500 | 2.06774300  |
| H  | -0.23719100 | -4.00668500 | 2.00354900  |
| H  | 0.92019700  | -3.87442800 | -0.12676800 |
| Pd | 0.55439900  | -0.46921000 | 0.06856300  |
| O  | 2.55352900  | -0.19488800 | 0.54619400  |
| C  | 3.33456500  | -0.03188500 | -0.47436100 |
| O  | 2.95318000  | -0.04620500 | -1.65249000 |
| C  | 4.77409000  | 0.22672600  | -0.11852500 |
| H  | 5.10790700  | -0.44533000 | 0.68011000  |
| H  | 5.41879600  | 0.11452300  | -0.99557800 |
| H  | 4.86793700  | 1.25450700  | 0.25807000  |



**TS<sub>36-37</sub>**

E (M06-SMD/BS1) = -1008.084031 au

H (M06-SMD/BS1) = -1007.742553 au

G (M06-SMD/BS1) = -1007.811391 au

E (M06-SMD/BS2//M06-SMD/BS1) = -1008.457194 au

|    |             |             |             |
|----|-------------|-------------|-------------|
| C  | 1.78133200  | -1.89168800 | 0.15666600  |
| C  | 0.81635000  | -2.87011900 | -0.50472500 |
| H  | 0.99461100  | -3.88962200 | -0.12698900 |
| C  | -0.64906800 | -2.54832400 | -0.32897900 |
| C  | -2.25107400 | -0.68077400 | -0.06211000 |
| C  | -2.82693400 | -1.15134200 | 1.27889200  |
| H  | -2.91776200 | -2.24287300 | 1.28578200  |
| H  | -3.82042900 | -0.71859900 | 1.45636300  |
| H  | -2.16434000 | -0.84775200 | 2.10272800  |
| C  | -3.15857600 | -1.07818700 | -1.22998500 |
| H  | -2.75791000 | -0.68854500 | -2.17583000 |
| H  | -4.17514300 | -0.68695400 | -1.09756700 |
| H  | -3.21958900 | -2.16838600 | -1.29740600 |
| C  | -2.14202700 | 0.83046200  | -0.01063400 |
| C  | -3.26537100 | 1.65364500  | 0.03573100  |
| H  | -4.26016500 | 1.21415400  | 0.02018800  |
| C  | -3.10862200 | 3.02925000  | 0.10750800  |
| H  | -3.98322600 | 3.67579400  | 0.14203300  |
| C  | -1.82738000 | 3.57260400  | 0.13489200  |
| H  | -1.66165800 | 4.64517600  | 0.18983600  |
| C  | -0.74917700 | 2.70971900  | 0.09410500  |
| H  | 0.27864800  | 3.06604700  | 0.11775700  |
| N  | -0.89285500 | -1.22733400 | -0.25775900 |
| O  | -1.50795500 | -3.44922700 | -0.30811600 |
| N  | -0.90924400 | 1.37727600  | 0.02512200  |
| H  | 1.00610200  | -2.90623100 | -1.58928400 |
| H  | 2.39394100  | -0.73716700 | -0.42857100 |
| C  | 1.83773200  | -2.00143900 | 1.67488600  |
| H  | 2.51563200  | -1.24889800 | 2.10379300  |
| H  | 0.85234000  | -1.86657800 | 2.14392600  |
| H  | 2.21144300  | -2.99403700 | 1.97592700  |
| H  | 2.77832000  | -2.19750000 | -0.20696500 |
| Pd | 0.63678100  | 0.01630900  | -0.02937600 |
| O  | 2.12550800  | 1.48939000  | 0.23037200  |
| C  | 3.25710600  | 1.15655600  | -0.23049000 |
| O  | 3.47526100  | 0.00460000  | -0.71443700 |

|   |            |            |             |
|---|------------|------------|-------------|
| C | 4.37255000 | 2.14865700 | -0.21751100 |
| H | 4.08690400 | 3.06514400 | 0.30535200  |
| H | 5.25434000 | 1.70474700 | 0.25860500  |
| H | 4.64715200 | 2.39006300 | -1.25196200 |

### 37

E (M06-SMD/BS1) = -1008.11293 au

H (M06-SMD/BS1) = -1007.765456 au

G (M06-SMD/BS1) = -1007.840232 au

E (M06-SMD/BS2//M06-SMD/BS1) = -1008.48581 au

|   |             |             |             |
|---|-------------|-------------|-------------|
| C | 1.51838200  | -2.02331400 | 0.21804600  |
| C | 0.55386600  | -2.95707100 | -0.50804200 |
| H | 0.63627500  | -3.99917400 | -0.15414800 |
| C | -0.89368900 | -2.51164600 | -0.38992400 |
| C | -2.29471800 | -0.47617200 | -0.14652400 |
| C | -3.06609200 | -0.94405400 | 1.09340200  |
| H | -3.27526200 | -2.01721200 | 1.02133800  |
| H | -4.02083100 | -0.41188300 | 1.19809700  |
| H | -2.46953500 | -0.76389200 | 1.99974000  |
| C | -3.10987500 | -0.70285800 | -1.42484100 |
| H | -2.56600600 | -0.31571000 | -2.29789600 |
| H | -4.08421000 | -0.20027900 | -1.37607900 |
| H | -3.28645700 | -1.77304100 | -1.57083500 |
| C | -2.03890800 | 1.02372000  | -0.00168400 |
| C | -3.10072100 | 1.93032300  | 0.02797300  |
| H | -4.12555800 | 1.57532500  | -0.05727600 |
| C | -2.84526400 | 3.28596400  | 0.16856500  |
| H | -3.67005900 | 3.99597400  | 0.19145800  |
| C | -1.52943100 | 3.72689000  | 0.27844200  |
| H | -1.28670400 | 4.78082000  | 0.38820600  |
| C | -0.52424200 | 2.77763800  | 0.24827700  |
| H | 0.52688300  | 3.05472200  | 0.33409400  |
| N | -1.00277000 | -1.17722200 | -0.23728200 |
| O | -1.83382600 | -3.32547800 | -0.48242000 |
| N | -0.77223800 | 1.46590200  | 0.11462100  |
| H | 0.77956300  | -2.97962100 | -1.58674700 |
| H | 2.19427300  | 0.30826300  | -1.64946900 |
| C | 1.68990700  | -2.38764100 | 1.67937500  |
| H | 2.32184100  | -1.66685700 | 2.21854400  |
| H | 0.72058600  | -2.43662800 | 2.20033500  |
| H | 2.16231400  | -3.38104000 | 1.78688700  |

|    |            |             |             |
|----|------------|-------------|-------------|
| H  | 2.49818200 | -1.98427000 | -0.28505100 |
| Pd | 0.66642400 | -0.16806100 | 0.14556200  |
| O  | 2.53052000 | 0.84891400  | 0.56269800  |
| C  | 3.31783500 | 1.09613900  | -0.35586900 |
| O  | 3.07140100 | 0.76392900  | -1.60817900 |
| C  | 4.61387400 | 1.78705500  | -0.15535100 |
| H  | 4.75712400 | 2.03139600  | 0.89936400  |
| H  | 5.42902500 | 1.14252700  | -0.50591000 |
| H  | 4.63780100 | 2.70188300  | -0.75973800 |

### 38

E (M06-SMD/BS1) = -779.1100022 au

H (M06-SMD/BS1) = -778.83203 au

G (M06-SMD/BS1) = -778.892463 au

E (M06-SMD/BS2//M06-SMD/BS1) = -779.3889206 au

|   |             |             |             |
|---|-------------|-------------|-------------|
| C | -2.67880200 | -0.93612400 | -0.14062700 |
| C | -2.96711500 | 0.48578300  | -0.60759000 |
| H | -3.90770000 | 0.88162300  | -0.18936700 |
| C | -1.83521400 | 1.43418800  | -0.26033100 |
| C | 0.62817000  | 1.48687000  | 0.08756600  |
| C | 0.58203500  | 2.07876700  | 1.50143800  |
| H | -0.21782700 | 2.82461600  | 1.56865700  |
| H | 1.53131000  | 2.56408100  | 1.76439900  |
| H | 0.38455300  | 1.28491000  | 2.23682700  |
| C | 0.90014900  | 2.57211300  | -0.96036800 |
| H | 0.98961700  | 2.12467500  | -1.95992800 |
| H | 1.82658500  | 3.11845600  | -0.74326100 |
| H | 0.07686500  | 3.29256600  | -0.97234200 |
| C | 1.77220200  | 0.47351800  | 0.04589100  |
| C | 3.09606200  | 0.89661700  | 0.18176400  |
| H | 3.32264600  | 1.95315700  | 0.30713400  |
| C | 4.12341800  | -0.03405100 | 0.16027200  |
| H | 5.15663300  | 0.29203500  | 0.26447400  |
| C | 3.81896500  | -1.38287700 | 0.00376700  |
| H | 4.59330300  | -2.14548500 | -0.02092000 |
| C | 2.48738900  | -1.73630800 | -0.11730600 |
| H | 2.18489600  | -2.77618800 | -0.23721800 |
| N | -0.64104000 | 0.80341100  | -0.21779800 |
| O | -2.02307400 | 2.65289300  | -0.09325000 |
| N | 1.49159600  | -0.83648900 | -0.09433100 |
| H | -3.07566300 | 0.51995500  | -1.70338100 |

|    |             |             |             |
|----|-------------|-------------|-------------|
| C  | -3.12981800 | -1.18707200 | 1.28198800  |
| H  | -2.81889700 | -2.17437000 | 1.65376800  |
| H  | -2.72875000 | -0.42647900 | 1.97036600  |
| H  | -4.23146300 | -1.14411900 | 1.36100700  |
| H  | -3.09477000 | -1.68952300 | -0.82977400 |
| Pd | -0.66402800 | -1.18261000 | -0.18692000 |

### 39

E (M06-SMD/BS1) = -1478.663362 au  
H (M06-SMD/BS1) = -1478.172961 au  
G (M06-SMD/BS1) = -1478.274095 au  
E (M06-SMD/BS2//M06-SMD/BS1) = -1765.613528 au

|    |             |             |             |
|----|-------------|-------------|-------------|
| Pd | -0.05572500 | 1.21317400  | 1.04373200  |
| C  | 1.60306900  | 2.26614500  | 0.46441700  |
| C  | 1.12379300  | 3.28128600  | -0.57329900 |
| H  | 1.89706400  | 3.50907000  | -1.32593800 |
| C  | -0.16029600 | 2.89035900  | -1.27977700 |
| C  | -2.25990000 | 1.61313300  | -0.95290700 |
| C  | -2.17924800 | 0.80337500  | -2.25475900 |
| H  | -1.73516700 | 1.41288300  | -3.04952300 |
| H  | -3.17557400 | 0.47841500  | -2.58412500 |
| H  | -1.55987400 | -0.09490800 | -2.11168800 |
| C  | -3.19616900 | 2.81574500  | -1.11348400 |
| H  | -3.28417400 | 3.35926300  | -0.16234700 |
| H  | -4.20146300 | 2.50809800  | -1.42862400 |
| H  | -2.79706100 | 3.49955400  | -1.86997900 |
| C  | -2.83095000 | 0.68596100  | 0.11898300  |
| C  | -4.12338500 | 0.16798300  | 0.00021000  |
| H  | -4.74612000 | 0.44121300  | -0.84920700 |
| C  | -4.60888800 | -0.70024500 | 0.96635200  |
| H  | -5.61496200 | -1.10632200 | 0.87835700  |
| C  | -3.79780600 | -1.04591600 | 2.04391300  |
| H  | -4.13870800 | -1.72502000 | 2.82137900  |
| C  | -2.52728200 | -0.50100000 | 2.09900400  |
| H  | -1.83979400 | -0.73766400 | 2.91230200  |
| N  | -0.92508400 | 2.07482900  | -0.53132600 |
| O  | -0.44651000 | 3.34895900  | -2.40585400 |
| N  | -2.05913300 | 0.34045800  | 1.16543000  |
| H  | 0.90431600  | 4.24038500  | -0.07010400 |
| H  | 2.24361100  | 1.50935900  | -0.02351000 |
| C  | 2.35370700  | 2.91796100  | 1.60585600  |

|   |             |             |             |
|---|-------------|-------------|-------------|
| H | 2.79342600  | 2.18434400  | 2.29566000  |
| H | 3.18257900  | 3.54311900  | 1.22595100  |
| H | 1.69970400  | 3.57979000  | 2.19514900  |
| C | 2.07411700  | -0.99972900 | -1.25814700 |
| C | 3.40726300  | -1.37867700 | -1.19214700 |
| C | 4.30954600  | -0.73819000 | -2.03938200 |
| C | 3.86796200  | 0.23791100  | -2.92868500 |
| C | 2.52036300  | 0.58469900  | -2.98287800 |
| C | 1.60388300  | -0.03094100 | -2.13450100 |
| H | 3.74328600  | -2.14634400 | -0.49818000 |
| H | 5.36170300  | -1.01446700 | -2.00398100 |
| H | 4.58075600  | 0.73159700  | -3.58669600 |
| H | 2.17214700  | 1.35066200  | -3.67414700 |
| H | 0.55528300  | 0.25971000  | -2.15001600 |
| I | 0.70546400  | -1.88458000 | 0.11867100  |
| O | -0.40198300 | -2.38364700 | -1.66627400 |
| C | -1.60872600 | -2.77628400 | -1.32624500 |
| O | -1.94357500 | -2.92896200 | -0.15352700 |
| O | 2.18392800  | -1.26815100 | 1.72511300  |
| C | 1.88915200  | -0.48341400 | 2.70233700  |
| O | 0.93456300  | 0.32156800  | 2.74436000  |
| C | 2.81683000  | -0.58727100 | 3.87718200  |
| H | 2.55300600  | 0.13934100  | 4.65085900  |
| H | 2.77472100  | -1.60246300 | 4.29015800  |
| H | 3.84727300  | -0.41372000 | 3.54345700  |
| C | -2.52375100 | -3.03773500 | -2.48213700 |
| H | -2.60089100 | -4.12280300 | -2.62872200 |
| H | -3.52376200 | -2.66076600 | -2.23975300 |
| H | -2.15914200 | -2.58167000 | -3.40667400 |

**TS<sub>39-40</sub>**

E (M06-SMD/BS1) = -1478.655863 au  
H (M06-SMD/BS1) = -1478.168355 au  
G (M06-SMD/BS1) = -1478.264828 au  
E (M06-SMD/BS2//M06-SMD/BS1) = -1765.602163 au

|    |             |             |             |
|----|-------------|-------------|-------------|
| Pd | -0.50273900 | -1.58511000 | -0.24210200 |
| C  | 0.87375500  | -2.70308900 | 0.77386900  |
| C  | 0.89109800  | -2.17899900 | 2.20681600  |
| H  | 1.71932200  | -1.46450800 | 2.34533200  |
| C  | -0.36330300 | -1.43059800 | 2.62318000  |
| C  | -2.31086900 | -0.19051800 | 1.72297900  |

|   |             |             |             |
|---|-------------|-------------|-------------|
| C | -1.87573600 | 1.16366100  | 2.30549700  |
| H | -1.45510900 | 1.02482900  | 3.30718500  |
| H | -2.72417600 | 1.85655800  | 2.38137300  |
| H | -1.11023800 | 1.62912400  | 1.66647600  |
| C | -3.37931800 | -0.85132700 | 2.60093300  |
| H | -3.71701300 | -1.79276900 | 2.14532300  |
| H | -4.25306500 | -0.20063500 | 2.73476100  |
| H | -2.96270700 | -1.07219300 | 3.58931600  |
| C | -2.91051600 | 0.07876000  | 0.34191200  |
| C | -4.06168700 | 0.85815400  | 0.20278200  |
| H | -4.55961200 | 1.26252700  | 1.08160900  |
| C | -4.56419400 | 1.12452500  | -1.06219700 |
| H | -5.45966500 | 1.73299100  | -1.17480600 |
| C | -3.91161000 | 0.61381600  | -2.18110700 |
| H | -4.26926600 | 0.80558600  | -3.18958500 |
| C | -2.77746900 | -0.15087500 | -1.97435800 |
| H | -2.21619400 | -0.57920500 | -2.80586600 |
| N | -1.14608400 | -1.08430400 | 1.58364200  |
| O | -0.56303400 | -1.15117400 | 3.82238600  |
| N | -2.29863800 | -0.41498000 | -0.74983700 |
| H | 1.07384600  | -2.98772800 | 2.93568100  |
| H | 1.85278500  | -2.58193600 | 0.28591700  |
| C | 0.39857700  | -4.13805400 | 0.68065900  |
| H | 0.32646200  | -4.49118800 | -0.35761800 |
| H | 1.09709000  | -4.81276100 | 1.20804800  |
| H | -0.58775800 | -4.26942700 | 1.15244700  |
| C | 2.59541800  | 1.04030900  | 0.28245200  |
| C | 3.80701800  | 1.09822300  | -0.39718000 |
| C | 4.97789600  | 1.09732600  | 0.35601500  |
| C | 4.91899600  | 1.04700600  | 1.74708800  |
| C | 3.69186400  | 1.00039900  | 2.40355700  |
| C | 2.50806700  | 0.99539700  | 1.67094000  |
| H | 3.84033200  | 1.14092000  | -1.48342500 |
| H | 5.93976000  | 1.13986400  | -0.15141700 |
| H | 5.84072400  | 1.04648500  | 2.32601900  |
| H | 3.64914300  | 0.96372300  | 3.49048100  |
| H | 1.54149700  | 0.95780100  | 2.17357400  |
| I | 0.76918400  | 1.07035400  | -0.79233500 |
| O | 0.67477800  | 3.18433600  | -0.17068900 |
| C | -0.54299300 | 3.60221400  | -0.40651600 |
| O | -1.39075000 | 2.90213900  | -0.95822100 |

|   |             |             |             |
|---|-------------|-------------|-------------|
| O | 1.97571500  | -0.90647400 | -2.03232700 |
| C | 1.31949000  | -1.85012800 | -2.53853000 |
| O | 0.18027800  | -2.25060700 | -2.13532600 |
| C | 1.92154400  | -2.60740400 | -3.69281000 |
| H | 1.14382700  | -2.93387500 | -4.39143400 |
| H | 2.67039200  | -2.00496600 | -4.21543500 |
| H | 2.41371900  | -3.50633300 | -3.29778000 |
| C | -0.81681700 | 4.98647500  | 0.10003100  |
| H | 0.06060500  | 5.63136600  | -0.00562400 |
| H | -1.67365200 | 5.41421100  | -0.42818800 |
| H | -1.05991400 | 4.91542300  | 1.16875300  |

#### 40

E (M06-SMD/BS1) = -1478.672403 au

H (M06-SMD/BS1) = -1478.185522 au

G (M06-SMD/BS1) = -1478.285741 au

E (M06-SMD/BS2//M06-SMD/BS1) = -1765.612048 au

|    |             |             |             |
|----|-------------|-------------|-------------|
| Pd | 0.96978400  | 0.70921200  | 0.62575000  |
| C  | 0.25619100  | 0.41928900  | 2.57292100  |
| C  | 0.56317800  | -1.01271300 | 2.94170100  |
| H  | -0.32153600 | -1.65466100 | 2.82250900  |
| C  | 1.68105900  | -1.64039900 | 2.12774800  |
| C  | 3.06501800  | -1.36297200 | 0.07341600  |
| C  | 2.52647200  | -2.56687900 | -0.70390700 |
| H  | 2.28316200  | -3.38179900 | -0.01250800 |
| H  | 3.26818300  | -2.93738400 | -1.42337800 |
| H  | 1.61992700  | -2.29173100 | -1.26285100 |
| C  | 4.38010200  | -1.70038300 | 0.78862800  |
| H  | 4.75137500  | -0.82273500 | 1.33539500  |
| H  | 5.14535600  | -2.00504600 | 0.06437500  |
| H  | 4.23178500  | -2.52005100 | 1.49552800  |
| C  | 3.34984900  | -0.23416500 | -0.90712100 |
| C  | 4.33754700  | -0.36534700 | -1.88452800 |
| H  | 4.90630400  | -1.28830300 | -1.96695000 |
| C  | 4.59474400  | 0.69098400  | -2.74465600 |
| H  | 5.36454500  | 0.59528500  | -3.50823800 |
| C  | 3.86835300  | 1.87157100  | -2.61745300 |
| H  | 4.04851800  | 2.72601100  | -3.26455200 |
| C  | 2.89126100  | 1.93017300  | -1.64180400 |
| H  | 2.27785800  | 2.81833300  | -1.50050800 |
| N  | 2.05942700  | -0.90012400 | 1.05737900  |

|   |             |             |             |
|---|-------------|-------------|-------------|
| O | 2.15460900  | -2.73629000 | 2.45417800  |
| N | 2.63531600  | 0.90147600  | -0.81913900 |
| H | 0.85272300  | -1.07386000 | 4.00353500  |
| H | -0.81132600 | 0.66726600  | 2.56208600  |
| C | 1.09173400  | 1.45716800  | 3.26338200  |
| H | 0.94053600  | 2.46706000  | 2.86150600  |
| H | 0.78751400  | 1.48738800  | 4.32517400  |
| H | 2.16342800  | 1.21436900  | 3.24105400  |
| C | -2.67198400 | 0.21831600  | 0.39850200  |
| C | -3.16966200 | 1.18380000  | -0.46794700 |
| C | -4.29368200 | 1.90242500  | -0.06803400 |
| C | -4.89048900 | 1.64781900  | 1.16424200  |
| C | -4.37465200 | 0.66867000  | 2.00946300  |
| C | -3.25167800 | -0.06327600 | 1.63092700  |
| H | -2.69318100 | 1.38154300  | -1.42634500 |
| H | -4.69972500 | 2.66659400  | -0.72878500 |
| H | -5.76797400 | 2.21604600  | 1.46781200  |
| H | -4.84648000 | 0.46631500  | 2.96941900  |
| H | -2.84503300 | -0.83713500 | 2.28045600  |
| I | -0.98999700 | -0.93522700 | -0.19954700 |
| O | -2.77388100 | -2.47871400 | -0.92911700 |
| C | -3.26818600 | -2.20715300 | -2.08851200 |
| O | -2.89025900 | -1.29744300 | -2.83691900 |
| O | -0.08753100 | 2.47756200  | 0.37573400  |
| C | -0.48374900 | 2.83723300  | -0.80075600 |
| O | -0.29259300 | 2.19282400  | -1.84062300 |
| C | -1.19639600 | 4.16630400  | -0.83291900 |
| H | -0.44883000 | 4.97092700  | -0.85805400 |
| H | -1.81847600 | 4.24513000  | -1.73115500 |
| H | -1.81010500 | 4.31034700  | 0.06347000  |
| C | -4.40373700 | -3.12238500 | -2.49855300 |
| H | -5.25732700 | -2.97028100 | -1.82579600 |
| H | -4.71506200 | -2.91615800 | -3.52764600 |
| H | -4.10006300 | -4.17168000 | -2.40621100 |

**TS<sub>40-41</sub>**

E (M06-SMD/BS1) = -1478.672267 au

H (M06-SMD/BS1) = -1478.183104 au

G (M06-SMD/BS1) = -1478.287105 au

E (M06-SMD/BS2//M06-SMD/BS1) = -1765.611033 au

Pd 0.98264400 -0.50244100 -0.60447600



|   |             |             |             |
|---|-------------|-------------|-------------|
| C | 0.33886500  | 0.03692900  | -2.55245700 |
| C | 0.57604900  | 1.51857900  | -2.68841800 |
| H | -0.34795100 | 2.09114800  | -2.52934700 |
| C | 1.62433200  | 2.07135400  | -1.73467100 |
| C | 3.04674900  | 1.45930700  | 0.22976200  |
| C | 2.40034600  | 2.30323900  | 1.33138400  |
| H | 2.02560400  | 3.24393000  | 0.90728600  |
| H | 3.12403900  | 2.54409700  | 2.12153200  |
| H | 1.55980100  | 1.76135900  | 1.78914000  |
| C | 4.27473300  | 2.16340300  | -0.35780200 |
| H | 4.70475900  | 1.56775700  | -1.17469000 |
| H | 5.04375500  | 2.29849400  | 0.41172100  |
| H | 4.00498900  | 3.14768500  | -0.74575800 |
| C | 3.49472200  | 0.13103200  | 0.82942900  |
| C | 4.55260700  | 0.05410300  | 1.73447900  |
| H | 5.08207400  | 0.95462000  | 2.03731500  |
| C | 4.92827800  | -1.18010300 | 2.24423500  |
| H | 5.75703800  | -1.24746600 | 2.94642700  |
| C | 4.24601100  | -2.32667000 | 1.84716400  |
| H | 4.51886500  | -3.31130200 | 2.21738800  |
| C | 3.18793100  | -2.18127800 | 0.96930800  |
| H | 2.60200600  | -3.03492400 | 0.63078800  |
| N | 2.05469900  | 1.16481600  | -0.82614200 |
| O | 2.00763900  | 3.24198200  | -1.83860600 |
| N | 2.82453100  | -0.98425100 | 0.48639300  |
| H | 0.91678100  | 1.74483300  | -3.71237600 |
| H | -0.71148500 | -0.27350600 | -2.59553300 |
| C | 1.25268100  | -0.85615600 | -3.32994400 |
| H | 1.15234500  | -1.91433600 | -3.05627700 |
| H | 0.96522400  | -0.77422100 | -4.39421500 |
| H | 2.30534900  | -0.55331100 | -3.25086700 |
| C | -2.70844200 | -0.23475300 | -0.53420900 |
| C | -3.15827700 | -1.36416300 | 0.14038000  |
| C | -4.21436500 | -2.08217900 | -0.41453100 |
| C | -4.79846900 | -1.66472300 | -1.60851500 |
| C | -4.33523700 | -0.52425900 | -2.25877500 |
| C | -3.27717200 | 0.20769000  | -1.72368400 |
| H | -2.70085000 | -1.67907300 | 1.07698200  |
| H | -4.57931400 | -2.97231100 | 0.09547200  |
| H | -5.62419200 | -2.23217300 | -2.03394300 |
| H | -4.79699400 | -0.19486700 | -3.18779800 |

|   |             |             |             |
|---|-------------|-------------|-------------|
| H | -2.91271700 | 1.10471900  | -2.22174600 |
| I | -1.11465100 | 0.89417500  | 0.30463500  |
| O | -3.09162600 | 2.16881500  | 1.27937400  |
| C | -3.58166900 | 1.63189800  | 2.33759100  |
| O | -3.14187600 | 0.62234500  | 2.91039200  |
| O | -0.00246700 | -2.32671800 | -0.57182200 |
| C | -0.30553300 | -2.82791000 | 0.58139600  |
| O | -0.08566200 | -2.27422500 | 1.66719700  |
| C | -0.93677800 | -4.19477500 | 0.51912700  |
| H | -0.13918000 | -4.94905500 | 0.47133000  |
| H | -1.53199600 | -4.38312100 | 1.41893500  |
| H | -1.55889500 | -4.30976800 | -0.37524700 |
| C | -4.81504600 | 2.33182200  | 2.87685900  |
| H | -5.63374100 | 2.23943800  | 2.15177500  |
| H | -5.12895000 | 1.89416400  | 3.83004500  |
| H | -4.61809900 | 3.40232700  | 3.00924900  |

#### 41

E (M06-SMD/BS1) = -1478.684728 au  
H (M06-SMD/BS1) = -1478.194124 au  
G (M06-SMD/BS1) = -1478.299778 au  
E (M06-SMD/BS2//M06-SMD/BS1) = -1765.621111 au

|    |            |             |             |
|----|------------|-------------|-------------|
| Pd | 0.94236000 | 0.17569300  | 0.12181300  |
| C  | 0.87816700 | -0.08922400 | 2.26591800  |
| C  | 1.18962100 | -1.54574100 | 2.42687400  |
| H  | 0.30191400 | -2.16605100 | 2.24796400  |
| C  | 2.29320500 | -1.93162200 | 1.45297800  |
| C  | 3.04346400 | -1.45210800 | -0.87711200 |
| C  | 2.33125700 | -1.43667600 | -2.23599300 |
| H  | 1.84290500 | -2.40759100 | -2.39650600 |
| H  | 3.06037700 | -1.27281800 | -3.04061300 |
| H  | 1.56669900 | -0.65110500 | -2.31246000 |
| C  | 4.03179900 | -2.61534900 | -0.89860900 |
| H  | 4.75374500 | -2.58040700 | -0.07983000 |
| H  | 4.57521700 | -2.60928900 | -1.85272600 |
| H  | 3.47970500 | -3.56136100 | -0.83729300 |
| C  | 3.71016300 | -0.10175600 | -0.66476700 |
| C  | 5.01951700 | 0.20369700  | -1.01102300 |
| H  | 5.66495700 | -0.56570100 | -1.42846100 |
| C  | 5.48908100 | 1.49820400  | -0.81726700 |
| H  | 6.51560400 | 1.74741100  | -1.07818800 |

|   |             |             |             |
|---|-------------|-------------|-------------|
| C | 4.64376300  | 2.46956200  | -0.29281000 |
| H | 4.97613500  | 3.49178100  | -0.13422600 |
| C | 3.34550400  | 2.11092500  | 0.02950500  |
| H | 2.63007900  | 2.82325600  | 0.43787200  |
| N | 2.00140800  | -1.55580600 | 0.17256600  |
| O | 3.30920700  | -2.51464700 | 1.82588800  |
| N | 2.91164800  | 0.85877000  | -0.15059200 |
| H | 1.54683600  | -1.72965300 | 3.45071400  |
| H | -0.17378500 | 0.20267300  | 2.37041000  |
| C | 1.84742300  | 0.87310600  | 2.84309600  |
| H | 1.68265900  | 1.90305900  | 2.50699600  |
| H | 1.66432100  | 0.86257300  | 3.93334000  |
| H | 2.89240300  | 0.57752200  | 2.68347100  |
| C | -2.72103200 | 0.38811100  | 0.50323100  |
| C | -3.14128200 | 1.37749400  | -0.37779200 |
| C | -4.02277400 | 2.34731300  | 0.09518600  |
| C | -4.46675200 | 2.31069900  | 1.41522500  |
| C | -4.03559000 | 1.30345200  | 2.27505000  |
| C | -3.15104300 | 0.32569100  | 1.82353000  |
| H | -2.79214400 | 1.39554500  | -1.40911500 |
| H | -4.36100800 | 3.13412900  | -0.57728000 |
| H | -5.15629400 | 3.07184000  | 1.77597000  |
| H | -4.38726300 | 1.27144900  | 3.30477500  |
| H | -2.81393800 | -0.47032700 | 2.48567100  |
| I | -1.38444900 | -1.11119900 | -0.19402100 |
| O | -4.16469000 | -2.23274800 | -0.39843100 |
| C | -4.76869500 | -1.49130900 | -1.22822700 |
| O | -4.30633900 | -1.08391700 | -2.32169000 |
| O | 0.05786600  | 2.05522500  | 0.18862800  |
| C | -0.05058600 | 2.47417300  | -1.02814800 |
| O | 0.30655300  | 1.79021800  | -2.00299000 |
| C | -0.60328300 | 3.85851500  | -1.20268000 |
| H | 0.23407700  | 4.55126300  | -1.36313300 |
| H | -1.24325200 | 3.89877800  | -2.09120300 |
| H | -1.16164400 | 4.18896400  | -0.32103600 |
| C | -6.15866100 | -1.02066900 | -0.82448100 |
| H | -6.05528600 | -0.19377400 | -0.10554600 |
| H | -6.73030600 | -0.65475500 | -1.68483200 |
| H | -6.71722000 | -1.81850500 | -0.32020900 |

E (M06-SMD/BS1) = -1594.359776 au  
 H (M06-SMD/BS1) = -1593.81243 au  
 G (M06-SMD/BS1) = -1593.923189 au  
 E (M06-SMD/BS2//M06-SMD/BS1) = -1881.344118 au

|    |             |             |             |
|----|-------------|-------------|-------------|
| Pd | -0.66778700 | -0.12458800 | 0.05936500  |
| C  | -0.69931700 | 2.21809700  | 0.44470100  |
| C  | -1.14739000 | 2.61193800  | -0.91623300 |
| H  | -0.32007900 | 2.57029800  | -1.63640600 |
| C  | -2.30343500 | 1.71158100  | -1.36036600 |
| C  | -2.97389400 | -0.67428500 | -1.47936700 |
| C  | -2.26610100 | -1.96150300 | -1.92492600 |
| H  | -1.90882900 | -1.83683000 | -2.95662800 |
| H  | -2.96829200 | -2.80530300 | -1.89490800 |
| H  | -1.40380600 | -2.21785400 | -1.29205800 |
| C  | -4.10989000 | -0.41578900 | -2.46437100 |
| H  | -4.81562600 | 0.34040700  | -2.11437700 |
| H  | -4.65216600 | -1.35283700 | -2.64784900 |
| H  | -3.68896200 | -0.08250800 | -3.42147500 |
| C  | -3.44484700 | -0.85422800 | -0.04639400 |
| C  | -4.70768000 | -1.28430000 | 0.33577500  |
| H  | -5.46384700 | -1.48270500 | -0.42015800 |
| C  | -4.98663200 | -1.45502200 | 1.68742700  |
| H  | -5.97461200 | -1.78688900 | 1.99999500  |
| C  | -4.00047600 | -1.20145100 | 2.63424400  |
| H  | -4.18331400 | -1.32782100 | 3.69781500  |
| C  | -2.75658100 | -0.77742600 | 2.19743100  |
| H  | -1.94009600 | -0.56310000 | 2.88543900  |
| N  | -1.95180500 | 0.39940700  | -1.42519600 |
| O  | -3.41096000 | 2.18747100  | -1.60625000 |
| N  | -2.50562300 | -0.61045900 | 0.89387000  |
| H  | -1.52788800 | 3.64219800  | -0.86949600 |
| H  | 0.37165700  | 2.11740000  | 0.66023100  |
| C  | -1.61164500 | 2.39152400  | 1.58542700  |
| H  | -1.30583100 | 1.81365500  | 2.46453100  |
| H  | -1.53649400 | 3.45949100  | 1.85829100  |
| H  | -2.66388900 | 2.20698400  | 1.33374100  |
| C  | 2.51124700  | -1.68351800 | -0.72468600 |
| C  | 2.33055000  | -2.93034500 | -1.31148300 |
| C  | 2.95891000  | -4.02875300 | -0.72881700 |
| C  | 3.74119900  | -3.86608100 | 0.41169400  |
| C  | 3.90620700  | -2.60429900 | 0.97754500  |

|   |            |             |             |
|---|------------|-------------|-------------|
| C | 3.28730800 | -1.49113300 | 0.41143800  |
| H | 1.70474800 | -3.04850000 | -2.19476900 |
| H | 2.82963300 | -5.01538000 | -1.17052400 |
| H | 4.22616300 | -4.72965200 | 0.86344100  |
| H | 4.51489200 | -2.47881400 | 1.87179900  |
| H | 3.38694100 | -0.50264700 | 0.85979300  |
| I | 1.50073700 | -0.00978100 | -1.57663600 |
| O | 2.66006000 | 3.35164900  | -0.40598400 |
| C | 3.15668600 | 2.49985500  | 0.39037600  |
| O | 2.53549100 | 1.92884000  | 1.32347900  |
| O | 0.42946500 | -0.59914600 | 1.75011000  |
| C | 0.50236700 | -1.87410400 | 1.96016100  |
| O | 0.01870400 | -2.72764700 | 1.20264200  |
| C | 1.17432500 | -2.25975600 | 3.24962500  |
| H | 0.43187200 | -2.19767000 | 4.05798400  |
| H | 1.54334300 | -3.28940600 | 3.20090300  |
| H | 1.99245900 | -1.57420700 | 3.49681000  |
| C | 4.60583700 | 2.12012500  | 0.15352100  |
| H | 5.18572200 | 2.97796300  | -0.20667200 |
| H | 5.07030500 | 1.71052000  | 1.05784500  |
| H | 4.64518800 | 1.34641500  | -0.62832800 |
| C | 0.92915000 | 4.76869700  | 1.99727600  |
| H | 1.93301400 | 5.22244900  | 2.02862900  |
| H | 0.22691000 | 5.46224300  | 2.47683400  |
| H | 0.95947000 | 3.84153900  | 2.59518700  |
| O | 0.50234200 | 4.54178100  | 0.67388800  |
| H | 1.25636700 | 4.08485300  | 0.21150200  |

## 42

E (M06-SMD/BS1) = -1365.443307 au

H (M06-SMD/BS1) = -1364.961359 au

G (M06-SMD/BS1) = -1365.058313 au

E (M06-SMD/BS2//M06-SMD/BS1) = -1652.328603 au

|    |             |             |             |
|----|-------------|-------------|-------------|
| Pd | -0.29635400 | -0.12985400 | 0.08968900  |
| C  | -1.77171800 | 2.69533800  | 0.87604500  |
| C  | -2.05844300 | 2.47700700  | -0.60770800 |
| H  | -1.14205100 | 2.67952900  | -1.17664700 |
| C  | -2.60355000 | 1.10130200  | -0.94439500 |
| C  | -2.18990500 | -1.17233000 | -1.72763800 |
| C  | -1.02260300 | -1.95114900 | -2.35145300 |
| H  | -0.69595400 | -1.44061900 | -3.26858400 |

|   |             |             |             |
|---|-------------|-------------|-------------|
| H | -1.34335600 | -2.96911900 | -2.61201900 |
| H | -0.15922600 | -2.02708200 | -1.67544900 |
| C | -3.31577600 | -1.15881600 | -2.75792200 |
| H | -4.26300500 | -0.79973600 | -2.34967700 |
| H | -3.46303000 | -2.16659500 | -3.16861800 |
| H | -3.02515600 | -0.50252900 | -3.58933700 |
| C | -2.55707000 | -1.84333900 | -0.42106300 |
| C | -3.57627000 | -2.76690900 | -0.23326100 |
| H | -4.21440900 | -3.04798400 | -1.06814900 |
| C | -3.76953900 | -3.31588200 | 1.02967700  |
| H | -4.56819300 | -4.03688500 | 1.19268500  |
| C | -2.94209500 | -2.93610800 | 2.08128400  |
| H | -3.06713000 | -3.34184200 | 3.08157400  |
| C | -1.93684300 | -2.01610900 | 1.83262400  |
| H | -1.25202700 | -1.67701800 | 2.60849300  |
| N | -1.69199700 | 0.18449500  | -1.38802600 |
| O | -3.82301600 | 0.89908800  | -0.83712300 |
| N | -1.75906500 | -1.49715700 | 0.61178500  |
| H | -2.81720100 | 3.20999800  | -0.92052600 |
| H | -1.03169600 | 1.94178300  | 1.21890900  |
| C | -3.01006200 | 2.59497500  | 1.74313700  |
| H | -2.78064700 | 2.80701300  | 2.79500500  |
| H | -3.77924700 | 3.30296400  | 1.40301600  |
| H | -3.42987000 | 1.58133200  | 1.69750200  |
| C | 3.18599100  | 0.12671700  | -0.62791700 |
| C | 3.36820700  | -0.85595800 | -1.59391500 |
| C | 4.36309400  | -1.80955400 | -1.38693100 |
| C | 5.14391400  | -1.77224900 | -0.23436100 |
| C | 4.94114000  | -0.77727000 | 0.71809700  |
| C | 3.95307500  | 0.18765900  | 0.52865300  |
| H | 2.74210600  | -0.88745900 | -2.48445500 |
| H | 4.52008600  | -2.58779800 | -2.13199100 |
| H | 5.91548300  | -2.52403100 | -0.07787000 |
| H | 5.54936800  | -0.74848800 | 1.62101300  |
| H | 3.77976600  | 0.96050900  | 1.27566700  |
| I | 1.59759400  | 1.53508000  | -0.88430400 |
| O | 0.90072400  | -0.52665500 | 1.73832300  |
| C | 1.53482000  | -1.65393100 | 1.73919000  |
| O | 1.49651200  | -2.48758900 | 0.82324700  |
| C | 2.31277900  | -1.92999300 | 3.00082100  |
| H | 1.63066200  | -2.37241400 | 3.74067300  |

|   |             |             |            |
|---|-------------|-------------|------------|
| H | 3.11870600  | -2.64598800 | 2.80777800 |
| H | 2.72180900  | -1.01066300 | 3.43447400 |
| C | -0.44898300 | 4.18507400  | 2.15733700 |
| H | 0.07187600  | 5.14444700  | 2.06493100 |
| H | -1.10656900 | 4.23118000  | 3.03970700 |
| H | 0.29941800  | 3.38914300  | 2.31941500 |
| O | -1.16099900 | 3.97642800  | 0.96014700 |

### 43

E (M06-SMD/BS1) = -930.4838017 au

H (M06-SMD/BS1) = -930.186073 au

G (M06-SMD/BS1) = -930.251745 au

E (M06-SMD/BS2//M06-SMD/BS1) = -930.8216598 au

|   |             |             |             |
|---|-------------|-------------|-------------|
| C | -2.33569200 | 2.15883600  | -0.23277600 |
| C | -1.38558100 | 1.15756800  | -0.07661900 |
| C | -1.85479200 | -0.19380000 | 0.04774100  |
| C | -3.24359800 | -0.48331800 | 0.01152500  |
| C | -4.17305200 | 0.56993600  | -0.14612900 |
| C | -3.71171500 | 1.85795700  | -0.26384600 |
| H | -2.00767600 | 3.18721400  | -0.33211400 |
| C | -3.63535300 | -1.83726900 | 0.13241600  |
| H | -5.23721500 | 0.33883400  | -0.17428700 |
| H | -4.41779900 | 2.67804000  | -0.38841400 |
| C | -2.68893300 | -2.81906800 | 0.28028500  |
| C | -1.33256900 | -2.44689300 | 0.31052400  |
| H | -4.69754300 | -2.08060000 | 0.10488000  |
| H | -2.96271200 | -3.86695700 | 0.37453200  |
| H | -0.54973700 | -3.19743700 | 0.43109800  |
| N | -0.93158800 | -1.19468300 | 0.20068100  |
| N | -0.00316400 | 1.32654700  | -0.02331400 |
| C | 0.66769500  | 2.51120700  | -0.00599200 |
| C | 2.14980200  | 2.30730800  | 0.21137400  |
| H | 2.70592400  | 3.13490500  | -0.25947100 |
| H | 2.31187200  | 2.41675500  | 1.29896100  |
| C | 2.64633700  | 0.93560300  | -0.23514800 |
| H | 2.74942100  | 0.91890100  | -1.33482900 |
| C | 3.95244000  | 0.54638000  | 0.41777100  |
| H | 3.83931800  | 0.41163000  | 1.50488400  |
| H | 4.37363700  | -0.37965600 | 0.00013600  |
| H | 4.71576900  | 1.33201100  | 0.27225800  |
| O | 0.16020800  | 3.63726300  | -0.09702000 |

|    |            |             |             |
|----|------------|-------------|-------------|
| Pd | 1.08706800 | -0.34671900 | 0.07775200  |
| O  | 2.23236600 | -2.18035500 | 0.20812200  |
| H  | 3.05661800 | -2.02893600 | 0.70109700  |
| C  | 2.55498400 | -2.73809700 | -1.07063500 |
| H  | 1.60524100 | -2.93905400 | -1.57585200 |
| H  | 3.14713100 | -2.03589700 | -1.67242200 |
| H  | 3.10547600 | -3.67708800 | -0.94036700 |

#### 44

E (M06-SMD/BS1) = -1502.937736 au  
H (M06-SMD/BS1) = -1502.433864 au  
G (M06-SMD/BS1) = -1502.524366 au  
E (M06-SMD/BS2//M06-SMD/BS1) = -1503.479093 au

|   |             |             |             |
|---|-------------|-------------|-------------|
| C | -4.03933800 | 0.25381100  | 0.32207300  |
| C | -2.66899600 | 0.41114500  | 0.49274400  |
| C | -1.94720800 | -0.66648500 | 1.11286300  |
| C | -2.62662600 | -1.83241700 | 1.55507300  |
| C | -4.02093800 | -1.94801100 | 1.35332500  |
| C | -4.69680800 | -0.91810300 | 0.74559700  |
| H | -4.60674600 | 1.04999300  | -0.14623400 |
| C | -1.85760800 | -2.84827200 | 2.16996900  |
| H | -4.53204600 | -2.85157800 | 1.68382500  |
| H | -5.77104300 | -0.99604700 | 0.58233500  |
| C | -0.50305400 | -2.69102500 | 2.32330100  |
| C | 0.09466400  | -1.51128400 | 1.84367600  |
| H | -2.36154400 | -3.75087000 | 2.51650900  |
| H | 0.11110200  | -3.45325000 | 2.79628500  |
| H | 1.17168300  | -1.35641400 | 1.94125000  |
| N | -0.59040400 | -0.54517800 | 1.26085600  |
| N | -1.90669000 | 1.51423400  | 0.12216200  |
| C | -2.37229600 | 2.68622700  | -0.38555500 |
| C | -1.25245200 | 3.68498500  | -0.57417700 |
| H | -1.53162600 | 4.40404600  | -1.36225500 |
| H | -1.20399900 | 4.26779500  | 0.36362400  |
| C | 0.10459600  | 3.03405200  | -0.83235900 |
| H | 0.14476500  | 2.68593500  | -1.87930300 |
| C | 1.25688600  | 3.96881200  | -0.55065700 |
| H | 1.29825800  | 4.25445200  | 0.51239500  |
| H | 2.22662700  | 3.52695500  | -0.81787300 |
| H | 1.15410500  | 4.90649100  | -1.12669700 |
| O | -3.55686200 | 2.96267700  | -0.62392400 |



|    |             |             |             |
|----|-------------|-------------|-------------|
| Pd | 0.08893200  | 1.28077200  | 0.23764800  |
| C  | 2.98611400  | -1.95531000 | -1.72302700 |
| C  | 2.35322100  | -0.82097200 | -1.26205300 |
| C  | 2.82699700  | -0.17882900 | -0.07807900 |
| C  | 3.98413700  | -0.71252200 | 0.55946200  |
| C  | 4.59193000  | -1.89014500 | 0.06580300  |
| C  | 4.08776900  | -2.51196600 | -1.04674800 |
| H  | 2.63589500  | -2.40741400 | -2.64934400 |
| C  | 4.49763200  | -0.04303900 | 1.69211900  |
| H  | 5.46687300  | -2.27965000 | 0.58490300  |
| H  | 4.55390400  | -3.41403100 | -1.43732100 |
| C  | 3.88374200  | 1.09438900  | 2.14550800  |
| C  | 2.72338500  | 1.53507300  | 1.48956500  |
| H  | 5.38340600  | -0.44396600 | 2.18377900  |
| H  | 4.25545100  | 1.64625000  | 3.00473400  |
| H  | 2.19393200  | 2.41514600  | 1.85348900  |
| N  | 2.19258900  | 0.92519300  | 0.43693900  |
| N  | 1.29425900  | -0.25058600 | -2.00152800 |
| H  | 1.36057400  | 0.74601400  | -2.20031900 |
| C  | 0.06791900  | -0.78189100 | -2.29588500 |
| C  | -0.22194100 | -2.19502200 | -1.86219600 |
| H  | 0.34550400  | -2.88399900 | -2.50817400 |
| H  | 0.17492800  | -2.35197900 | -0.84544000 |
| C  | -1.70262800 | -2.53785700 | -1.92050800 |
| H  | -2.06220500 | -2.43317000 | -2.95410300 |
| H  | -2.27168400 | -1.80702500 | -1.32389800 |
| C  | -1.96915200 | -3.94261400 | -1.41169600 |
| H  | -1.60691600 | -4.06605900 | -0.37961800 |
| H  | -3.04232700 | -4.17466400 | -1.41746100 |
| H  | -1.45950700 | -4.69564800 | -2.03012400 |
| O  | -0.75891200 | -0.09453400 | -2.89790300 |

#### 45

E (M06-SMD/BS1) = -1502.919763 au  
 H (M06-SMD/BS1) = -1502.415861 au  
 G (M06-SMD/BS1) = -1502.510273 au  
 E (M06-SMD/BS2//M06-SMD/BS1) = -1503.461371 au  

|   |             |             |             |
|---|-------------|-------------|-------------|
| C | -5.62935000 | -0.26338800 | 0.06070800  |
| C | -4.26184400 | -0.09383800 | -0.11638800 |
| C | -3.74630000 | 1.24612300  | -0.08131900 |
| C | -4.61514200 | 2.35058400  | 0.12071700  |

|    |             |             |             |
|----|-------------|-------------|-------------|
| C  | -6.00057200 | 2.12765000  | 0.29129900  |
| C  | -6.48037900 | 0.84159700  | 0.26003600  |
| H  | -6.04420800 | -1.26475400 | 0.04428100  |
| C  | -4.03947200 | 3.64259000  | 0.14658800  |
| H  | -6.66011800 | 2.98033300  | 0.44812000  |
| H  | -7.54538700 | 0.65611900  | 0.39440700  |
| C  | -2.68708500 | 3.79861500  | -0.02003100 |
| C  | -1.89629400 | 2.65161000  | -0.21559700 |
| H  | -4.68942100 | 4.50394700  | 0.30097000  |
| H  | -2.21919100 | 4.77982300  | -0.00485600 |
| H  | -0.81738100 | 2.73570200  | -0.35488300 |
| N  | -2.39887000 | 1.43225200  | -0.24627600 |
| N  | -3.32154400 | -1.09955900 | -0.33028600 |
| C  | -3.58443700 | -2.41792200 | -0.53960100 |
| C  | -2.33095300 | -3.18261500 | -0.89726200 |
| H  | -2.44000200 | -4.23401200 | -0.58283500 |
| H  | -2.29535600 | -3.20107200 | -2.00160500 |
| C  | -1.05319800 | -2.54021100 | -0.36479900 |
| H  | -0.95231500 | -2.76193600 | 0.71276700  |
| C  | 0.17666300  | -2.99882800 | -1.11465500 |
| H  | 0.17019000  | -2.64595100 | -2.15765100 |
| H  | 1.11177600  | -2.65343600 | -0.65128300 |
| H  | 0.22544600  | -4.10231800 | -1.14893600 |
| O  | -4.70115000 | -2.95398000 | -0.50805100 |
| Pd | -1.40280700 | -0.52425400 | -0.38276300 |
| C  | 4.40808000  | -1.44270100 | 0.90780000  |
| C  | 4.13365000  | -0.39662700 | 0.05519600  |
| C  | 5.18994600  | 0.43723300  | -0.41777900 |
| C  | 6.51016500  | 0.19606000  | 0.04926500  |
| C  | 6.75422300  | -0.85511500 | 0.96410300  |
| C  | 5.72077700  | -1.65753800 | 1.37736500  |
| H  | 3.61324600  | -2.12333100 | 1.20737500  |
| C  | 7.53334900  | 1.04087500  | -0.43944600 |
| H  | 7.77158100  | -1.01953600 | 1.31804400  |
| H  | 5.90520400  | -2.48251500 | 2.06265600  |
| C  | 7.22131000  | 2.03217600  | -1.33334500 |
| C  | 5.87811600  | 2.17517600  | -1.74117000 |
| H  | 8.55686800  | 0.88552600  | -0.09826900 |
| H  | 7.98192000  | 2.69949400  | -1.73187000 |
| H  | 5.61643200  | 2.95453500  | -2.45966400 |
| N  | 4.89110600  | 1.41928600  | -1.30776400 |

|   |             |             |             |
|---|-------------|-------------|-------------|
| N | 2.84875600  | -0.13576700 | -0.45807200 |
| H | 2.83691300  | 0.24562400  | -1.40440600 |
| C | 1.63520400  | -0.16447300 | 0.13227100  |
| C | 1.50993700  | -0.44853800 | 1.59897500  |
| H | 1.26739600  | -1.51794000 | 1.72073800  |
| H | 2.48150200  | -0.29722200 | 2.08744700  |
| C | 0.45353000  | 0.40331600  | 2.29644900  |
| H | -0.53987600 | 0.18592500  | 1.87320300  |
| H | 0.65355000  | 1.46812600  | 2.09910900  |
| C | 0.44657200  | 0.13732800  | 3.79073100  |
| H | 1.41899900  | 0.37484900  | 4.24498100  |
| H | -0.31603000 | 0.74070100  | 4.29922700  |
| H | 0.23207400  | -0.92023300 | 4.00198200  |
| O | 0.64992200  | 0.09159200  | -0.59643000 |

**TS<sup>OMe</sup><sub>18-19</sub>**

E (M06-SMD/BS1) = -1360.53033543 au

H (M06-SMD/BS1) = -1360.143034 au

G (M06-SMD/BS1) = -1360.230451 au

E (M06-SMD/BS2//M06-SMD/BS1) = -1647.41281255 au

|   |             |             |             |
|---|-------------|-------------|-------------|
| C | -3.59499100 | 1.25130200  | 1.50901800  |
| C | -2.61915600 | 0.73667600  | 0.66745100  |
| C | -2.16198500 | 1.55457300  | -0.41811300 |
| C | -2.70687700 | 2.85124700  | -0.61266700 |
| C | -3.70084500 | 3.33461600  | 0.26646600  |
| C | -4.12449600 | 2.53989700  | 1.30097600  |
| H | -3.95782500 | 0.64902200  | 2.33279800  |
| C | -2.21949000 | 3.60898000  | -1.70378600 |
| H | -4.11400200 | 4.32913500  | 0.10441600  |
| H | -4.89143500 | 2.89726000  | 1.98612900  |
| C | -1.25934600 | 3.08989400  | -2.53375700 |
| C | -0.77209900 | 1.79649200  | -2.26950900 |
| H | -2.62363800 | 4.60756700  | -1.86844700 |
| H | -0.87109600 | 3.65058300  | -3.38006800 |
| H | -0.01062700 | 1.34455500  | -2.90720500 |
| N | -1.20128200 | 1.06989400  | -1.25840000 |
| N | -2.04673200 | -0.53738600 | 0.80295600  |
| C | -2.24967600 | -1.45868900 | 1.80152600  |
| C | -1.32827000 | -2.64915400 | 1.69655500  |
| H | -1.84272300 | -3.53369200 | 2.10097300  |
| H | -0.46938200 | -2.45817600 | 2.36078100  |

|    |             |             |             |
|----|-------------|-------------|-------------|
| C  | -0.87250400 | -2.90379200 | 0.27872200  |
| H  | -1.68982700 | -3.33305000 | -0.31316000 |
| C  | 0.42045600  | -3.63264600 | 0.08917300  |
| H  | 1.24505800  | -3.16861400 | 0.64725000  |
| H  | 0.69908900  | -3.69795000 | -0.97263000 |
| H  | 0.31101400  | -4.66758300 | 0.45760800  |
| O  | -3.06786900 | -1.31301100 | 2.70594800  |
| Pd | -0.73542700 | -1.04220500 | -0.62179800 |
| C  | 4.86265200  | 0.81036000  | -0.79242200 |
| C  | 3.82003400  | 0.73266400  | 0.13434200  |
| C  | 2.65359600  | 0.08876600  | -0.26689300 |
| C  | 2.50868200  | -0.48121400 | -1.52451100 |
| C  | 3.56781300  | -0.38812700 | -2.42577100 |
| C  | 4.74278100  | 0.26101200  | -2.06144200 |
| H  | 5.77725400  | 1.31438700  | -0.48509500 |
| H  | 1.59806600  | -0.99967600 | -1.82803200 |
| H  | 3.46331800  | -0.83080500 | -3.41474000 |
| H  | 5.56876100  | 0.33321500  | -2.76640800 |
| I  | 1.02969700  | 0.00412400  | 1.14495000  |
| C  | 4.00715500  | 1.32115400  | 1.51367300  |
| O  | 5.06606200  | 1.92004600  | 1.76624900  |
| O  | 3.04660600  | 1.14512900  | 2.32863600  |
| O  | -1.47141300 | -1.70359300 | -2.36946400 |
| C  | -2.01365800 | -2.95119000 | -2.66367700 |
| H  | -1.35840700 | -3.79640700 | -2.38670600 |
| H  | -2.19496800 | -3.01104400 | -3.75012100 |
| H  | -2.99258100 | -3.09892500 | -2.17199700 |

### 19<sup>OMe</sup>

E (M06-SMD/BS1) = -1360.53508673 au

H (M06-SMD/BS1) = -1360.146486 au

G (M06-SMD/BS1) = -1360.235246 au

E (M06-SMD/BS2//M06-SMD/BS1) = -1647.41641234 au

|   |             |             |             |
|---|-------------|-------------|-------------|
| C | -4.16559600 | 0.39003700  | -1.35367700 |
| C | -2.97579600 | 0.14942600  | -0.68253900 |
| C | -2.69406700 | -1.18960200 | -0.25264300 |
| C | -3.60164400 | -2.23711300 | -0.56008900 |
| C | -4.78882500 | -1.95330100 | -1.27120400 |
| C | -5.05553500 | -0.66129200 | -1.64643100 |
| H | -4.39912000 | 1.39700600  | -1.67840300 |
| C | -3.26920900 | -3.54048300 | -0.12273000 |

|    |             |             |             |
|----|-------------|-------------|-------------|
| H  | -5.47441700 | -2.76712700 | -1.50281100 |
| H  | -5.97049900 | -0.42602400 | -2.18743200 |
| C  | -2.11065500 | -3.75996100 | 0.57746300  |
| C  | -1.27740700 | -2.66133100 | 0.85759400  |
| H  | -3.95077900 | -4.35910300 | -0.35256000 |
| H  | -1.83029900 | -4.75180000 | 0.92234200  |
| H  | -0.35170300 | -2.79380300 | 1.41995300  |
| N  | -1.55988700 | -1.43578400 | 0.46559100  |
| N  | -2.01776800 | 1.13468900  | -0.40721700 |
| C  | -1.98477000 | 2.44228600  | -0.82884400 |
| C  | -0.81078900 | 3.21280300  | -0.27910800 |
| H  | -1.10158700 | 4.26742800  | -0.16298000 |
| H  | -0.01471400 | 3.18514300  | -1.04071800 |
| C  | -0.31589700 | 2.65734100  | 1.03182800  |
| H  | -1.01238800 | 2.86092100  | 1.85437000  |
| C  | 1.10993500  | 2.89724000  | 1.40072900  |
| H  | 1.80454400  | 2.69424400  | 0.57617100  |
| H  | 1.41222200  | 2.31818500  | 2.28485700  |
| H  | 1.21756000  | 3.96139400  | 1.67715000  |
| O  | -2.79424800 | 2.91371900  | -1.62106400 |
| Pd | -0.63062200 | 0.59559800  | 0.90009400  |
| C  | 5.06366000  | -1.07904200 | 0.53080800  |
| C  | 4.06263200  | -0.66399100 | -0.35422100 |
| C  | 2.77639900  | -0.52947000 | 0.16273700  |
| C  | 2.47956100  | -0.79825200 | 1.49499400  |
| C  | 3.49729700  | -1.22055900 | 2.34652300  |
| C  | 4.79331900  | -1.36108300 | 1.86236600  |
| H  | 6.07216300  | -1.17936000 | 0.13387000  |
| H  | 1.46869600  | -0.69694300 | 1.89304000  |
| H  | 3.26557300  | -1.43898400 | 3.38758800  |
| H  | 5.59268700  | -1.69140700 | 2.52317700  |
| I  | 1.17996300  | 0.14733800  | -1.11641200 |
| C  | 4.43914600  | -0.41233400 | -1.80627900 |
| O  | 5.65482900  | -0.31273400 | -2.07006700 |
| O  | 3.48473900  | -0.33847000 | -2.62855600 |
| O  | -1.99450400 | 0.80846300  | 2.36479400  |
| C  | -1.28700200 | 0.44311900  | 3.50759400  |
| H  | -0.86529900 | -0.58052300 | 3.43793000  |
| H  | -1.98831900 | 0.43455800  | 4.36097700  |
| H  | -0.47525300 | 1.15295000  | 3.76026800  |

**TS<sup>α</sup><sub>15-16</sub>**

E (M06-SMD/BS1) = -1043.75477998 au

H (M06-SMD/BS1) = -1043.451449 au

G (M06-SMD/BS1) = -1043.521142 au

E (M06-SMD/BS2//M06-SMD/BS1) = -1044.13672027 au

|    |             |             |             |
|----|-------------|-------------|-------------|
| C  | 2.66119500  | -2.26790100 | -0.03478000 |
| C  | 1.78901600  | -1.21416100 | 0.15640000  |
| C  | 2.28661400  | 0.11643800  | 0.08412100  |
| C  | 3.65918600  | 0.36673600  | -0.14329800 |
| C  | 4.52893600  | -0.73497300 | -0.32355200 |
| C  | 4.02802700  | -2.01464400 | -0.27815800 |
| H  | 2.29563600  | -3.29044800 | 0.02191400  |
| C  | 4.07189300  | 1.71840000  | -0.20164900 |
| H  | 5.58549400  | -0.54793700 | -0.50954200 |
| H  | 4.69584000  | -2.86184200 | -0.42489500 |
| C  | 3.15210400  | 2.72647400  | -0.05005600 |
| C  | 1.79961500  | 2.39843400  | 0.15573600  |
| H  | 5.12419800  | 1.94310000  | -0.37337200 |
| H  | 3.44295900  | 3.77263400  | -0.09312400 |
| H  | 1.04021200  | 3.17114400  | 0.26743700  |
| N  | 1.38348300  | 1.14659900  | 0.21844700  |
| N  | 0.44003000  | -1.30578300 | 0.50389800  |
| C  | -0.51183400 | -2.12512600 | -0.05053200 |
| C  | -1.85931000 | -1.52818500 | 0.30564000  |
| O  | -0.31334000 | -3.12138200 | -0.74114600 |
| Pd | -0.55290300 | 0.37252400  | 0.31196300  |
| O  | -1.68473000 | 2.12309300  | 0.04531300  |
| C  | -2.87030800 | 1.86414800  | -0.32048200 |
| O  | -3.31232700 | 0.68215200  | -0.45433200 |
| C  | -3.80320100 | 2.99592100  | -0.60476900 |
| H  | -4.65352200 | 2.94313000  | 0.08607900  |
| H  | -4.20247600 | 2.89350500  | -1.62072000 |
| H  | -3.30412400 | 3.96272800  | -0.49884000 |
| H  | -2.38264600 | -0.21932400 | -0.04967300 |
| C  | -3.02919000 | -2.20828000 | -0.41199700 |
| H  | -3.15370900 | -1.79660800 | -1.42477300 |
| H  | -2.74689000 | -3.26256200 | -0.54853000 |
| C  | -4.33303600 | -2.13426200 | 0.36205800  |
| H  | -4.22853700 | -2.61487700 | 1.34518600  |
| H  | -5.13771900 | -2.65151500 | -0.17656500 |
| H  | -4.65602000 | -1.09878500 | 0.52861000  |

H -1.98481200 -1.58918200 1.39731700

**TS<sub>15-16</sub>**

E (M06-SMD/BS1) = -1043.76169994 au

H (M06-SMD/BS1) = -1043.459012 au

G (M06-SMD/BS1) = -1043.525367 au

E (M06-SMD/BS2//M06-SMD/BS1) = -1044.14399250 au

C -3.02646400 1.29846000 -0.74958700

C -1.85571200 0.73534700 -0.26094500

C -1.87608000 -0.65818700 0.01714800

C -3.05417100 -1.43419000 -0.12070700

C -4.22976500 -0.81112000 -0.59338700

C -4.19329200 0.52437600 -0.91243600

H -3.05212800 2.35073000 -1.00658500

C -2.97698500 -2.80507900 0.21394600

H -5.13724600 -1.40226900 -0.70686500

H -5.08640800 1.01402500 -1.29778200

C -1.78991600 -3.34584100 0.64203100

C -0.65569800 -2.52098300 0.72096800

H -3.87163900 -3.42046000 0.12252200

H -1.70344300 -4.39620900 0.90699600

H 0.31199200 -2.91509600 1.02691400

N -0.70383200 -1.23543500 0.41804400

N -0.62946100 1.39504100 -0.04665200

C -0.61538800 2.72032900 0.26433700

C 1.92267100 2.89652200 -0.29014600

C 2.46552800 1.58241200 0.23057700

H 2.43167200 1.53142700 1.33212000

O -1.63822100 3.40725300 0.40783600

Pd 0.89529000 0.05607900 0.26075700

O 2.29810000 -1.49219500 0.45752800

C 3.14854100 -1.47474600 -0.48548200

O 3.24605300 -0.49481600 -1.28667700

C 4.05121400 -2.64822500 -0.66760500

H 5.07818700 -2.30663000 -0.83551800

H 3.73504500 -3.19652000 -1.56445700

H 4.01010300 -3.32020400 0.19357800

H 2.58351100 0.48686000 -0.65447500

H 3.54618100 1.50610800 0.02252100

C 0.71825800 3.39493300 0.48610300

H 0.93386400 3.33835500 1.56712400

|   |            |            |             |
|---|------------|------------|-------------|
| H | 0.53997900 | 4.45677500 | 0.27259500  |
| H | 1.67995600 | 2.82387800 | -1.36175700 |
| H | 2.70617100 | 3.66635000 | -0.20987400 |

**16<sup>α</sup>**

E (M06-SMD/BS1) = -1043.78400239 au

H (M06-SMD/BS1) = -1043.475339 au

G (M06-SMD/BS1) = -1043.547544 au

E (M06-SMD/BS2//M06-SMD/BS1) = -1044.16695403 au

|    |             |             |             |
|----|-------------|-------------|-------------|
| C  | -2.91889700 | 2.00765300  | -0.15374300 |
| C  | -1.92284400 | 1.10358400  | 0.16613800  |
| C  | -2.21648800 | -0.29520600 | 0.12078800  |
| C  | -3.52126400 | -0.73495400 | -0.21953700 |
| C  | -4.51805200 | 0.22063300  | -0.52734200 |
| C  | -4.20980000 | 1.55970900  | -0.50031300 |
| H  | -2.70430700 | 3.07373800  | -0.11413200 |
| C  | -3.75032500 | -2.13062300 | -0.25982400 |
| H  | -5.51560400 | -0.12553700 | -0.79515100 |
| H  | -4.97245100 | 2.29771500  | -0.74413500 |
| C  | -2.72757000 | -3.00247400 | 0.01449200  |
| C  | -1.45856500 | -2.48185300 | 0.33306200  |
| H  | -4.74477600 | -2.49471200 | -0.51771500 |
| H  | -2.87443300 | -4.07928100 | -0.01301600 |
| H  | -0.62292000 | -3.14841600 | 0.54983200  |
| N  | -1.20546800 | -1.18805900 | 0.38603900  |
| N  | -0.65003400 | 1.45823400  | 0.61857500  |
| C  | 0.22086900  | 2.30076500  | -0.05438400 |
| C  | 1.56143800  | 1.89161700  | 0.44269900  |
| O  | -0.04586400 | 3.06393300  | -0.98800200 |
| Pd | 0.68319300  | -0.01636400 | 0.57433600  |
| O  | 2.27075700  | -1.49228400 | 0.52510300  |
| C  | 2.87882200  | -1.78536800 | -0.50768800 |
| O  | 2.62278400  | -1.22289100 | -1.67274400 |
| C  | 3.98026700  | -2.77711900 | -0.54863800 |
| H  | 4.92336600  | -2.24532800 | -0.73224000 |
| H  | 3.83021300  | -3.47603400 | -1.37885600 |
| H  | 4.04466600  | -3.31607400 | 0.39905300  |
| H  | 1.89980600  | -0.56302400 | -1.56650200 |
| C  | 2.74915900  | 2.18116700  | -0.43405000 |
| H  | 2.58334700  | 1.75690200  | -1.43820300 |
| H  | 2.81932300  | 3.27363100  | -0.58451500 |



|   |            |            |             |
|---|------------|------------|-------------|
| C | 4.05471900 | 1.67114100 | 0.15050000  |
| H | 4.25586100 | 2.13933200 | 1.12492400  |
| H | 4.90539000 | 1.89207500 | -0.50695400 |
| H | 4.02847300 | 0.58379600 | 0.31329000  |
| H | 1.71546100 | 2.13065000 | 1.50475200  |

### 16<sup>v</sup>

E (M06-SMD/BS1) = -1043.79871674 au

H (M06-SMD/BS1) = -1043.489349 au

G (M06-SMD/BS1) = -1043.559273 au

E (M06-SMD/BS2//M06-SMD/BS1) = -1044.18064468 au

|    |             |             |             |
|----|-------------|-------------|-------------|
| C  | -3.22979900 | 0.74858100  | -0.62192500 |
| C  | -1.95010800 | 0.43021100  | -0.18799600 |
| C  | -1.67128500 | -0.94693900 | 0.07435900  |
| C  | -2.68108300 | -1.93698000 | -0.05782300 |
| C  | -3.97490200 | -1.55876700 | -0.47852200 |
| C  | -4.22464200 | -0.23808300 | -0.76231800 |
| H  | -3.47187900 | 1.77913600  | -0.85850600 |
| C  | -2.32655300 | -3.27589000 | 0.22849000  |
| H  | -4.74570300 | -2.32164400 | -0.58085200 |
| H  | -5.21236300 | 0.06676400  | -1.10568300 |
| C  | -1.04506900 | -3.58364800 | 0.60965900  |
| C  | -0.10035800 | -2.54506400 | 0.69782500  |
| H  | -3.08637000 | -4.05199200 | 0.13590400  |
| H  | -0.74563200 | -4.60428000 | 0.83409400  |
| H  | 0.93139700  | -2.75332100 | 0.98510200  |
| N  | -0.39963600 | -1.28543900 | 0.44328200  |
| N  | -0.89385900 | 1.34558300  | -0.04936600 |
| C  | -1.13618500 | 2.63298500  | 0.31386800  |
| C  | 1.18640000  | 3.28196500  | -0.59915200 |
| C  | 2.01107900  | 2.09537200  | -0.17152000 |
| H  | 2.53229100  | 2.29154300  | 0.78227100  |
| O  | -2.25310000 | 3.07981200  | 0.62516100  |
| Pd | 0.91798800  | 0.42968400  | 0.20175400  |
| O  | 2.77494300  | -0.58737600 | 0.54044100  |
| C  | 3.28779900  | -1.30948900 | -0.32011000 |
| O  | 2.76634100  | -1.47940800 | -1.51850500 |
| C  | 4.53983300  | -2.07057200 | -0.09478300 |
| H  | 5.26652600  | -1.82594900 | -0.87821300 |
| H  | 4.32652500  | -3.14425000 | -0.16944600 |
| H  | 4.95360800  | -1.84212100 | 0.88963900  |

|   |             |             |             |
|---|-------------|-------------|-------------|
| H | 1.93754400  | -0.95286300 | -1.59888800 |
| H | 2.75957200  | 1.80483700  | -0.92709200 |
| C | 0.04799800  | 3.57630900  | 0.36284200  |
| H | 0.43152200  | 3.57570400  | 1.39787900  |
| H | -0.36401700 | 4.58018200  | 0.19380000  |
| H | 0.78280300  | 3.12813100  | -1.61269000 |
| H | 1.82696300  | 4.17947900  | -0.65957200 |
